# Supplementary material for: Synthesis of 4-hydroxyindole fused isocoumarin derivatives and their fluorescence “Turn-off” sensing of Cu(ii) and Fe(iii) ions
Source: Royal Society of Chemistry journal article supplement (doi:10.1039/c5ra01060h), 2015-01-01

## Synthesis of 4-hydroxyindole fused isocoumarin derivatives and their fluorescence “Turn-off” sensing of Cu(II) and Fe(III) ions

Sudipta Pathak, Doyel Das, Ashis Kundu, Subhendu Maity, Nikhil Guchhait and Animesh Pramanik\*

*Department of Chemistry, University of Calcutta, 92, A. P. C. Road, Kolkata-700 009, India*

E-mail: animesh\_in2001@yahoo.co.in

### Supporting Information

| Contents                                                           | Pages     |
|--------------------------------------------------------------------|-----------|
| 1. Photophysical Study.....                                        | S2 – S10  |
| 2. X-ray crystallographic data and analysis.....                   | S11 – S15 |
| 3. Association constant for complexes.....                         | S15       |
| 4. Titration of ligand with low metal concentration.....           | S15-S16   |
| 5. General information.....                                        | S17       |
| 6. <sup>1</sup> H NMR, <sup>13</sup> C NMR and Mass spectrums..... | S18-S50   |

## Photophysical Study

Spectroscopic grade solvents were purchased from Spectrochem, India and used without further distillation. The concentration of the ligands was maintained at  $5 \times 10^{-5}$  M. Absorption and emission measurements were performed using Hitachi UV-vis U-3501 spectrophotometer and Perkin Elmer LS-55 fluorimeter respectively. The backgrounds of the recorded spectra were appropriately subtracted with a blank solvent in order to eliminate any spectral interference. The experiments have been carried out at room temperature.

Theoretical calculations have been performed using Gaussian 09 suite of program. Optimization of the ground state geometry has been carried out at DFT level using B3LYP hybrid functional and 6-31+G(d,p) basis set. The excited state was regenerated by the vertical excitation of the optimized ground state geometry followed by optimization at the excited state using TDDFT method and B3LYP/6-31+G(d,p) functional and basis set.

Fluorescence quantum yields ( $\Phi_F$ ) in various solvents are determined using the following equation<sup>1</sup>

$$\Phi_{\text{sample}} = [(A_{\text{std}} F_{\text{sample}} \eta_{\text{sample}}^2 / A_{\text{sample}} F_{\text{std}} \eta_{\text{std}}^2)] \Phi_{\text{std}}$$

In this equation  $\Phi_{\text{sample}}$  and  $\Phi_{\text{std}}$  are the quantum yields of sample and standard, respectively;  $A_{\text{std}}$  and  $A_{\text{sample}}$  are the absorbance of the sample and standard, respectively;  $F_{\text{sample}}$  and  $F_{\text{std}}$  are integrated emission area across the fluorescence band and  $\eta_{\text{sample}}$  and  $\eta_{\text{std}}$  are the refractive indexes of the sample and standard solution, respectively.

**Table S1.** Spectroscopic data of **9** in three solvents

| Compounds | Solvent | $\lambda_{\text{abs}}(\text{nm})$ | $\lambda_{\text{em}}(\text{nm})$ | $\Phi_F^a$ |
|-----------|---------|-----------------------------------|----------------------------------|------------|
|-----------|---------|-----------------------------------|----------------------------------|------------|

---

|           |                                 |     |     |      |
|-----------|---------------------------------|-----|-----|------|
| <b>9a</b> | CH <sub>2</sub> Cl <sub>2</sub> | 382 | 496 | 0.42 |
|           | CH <sub>3</sub> CN              | 385 | 501 | 0.47 |
|           | CH <sub>3</sub> OH              | 395 | 511 | 0.23 |
| <b>9b</b> | CH <sub>2</sub> Cl <sub>2</sub> | 378 | 494 | 0.42 |
|           | CH <sub>3</sub> CN              | 382 | 499 | 0.58 |
|           | CH <sub>3</sub> OH              | 391 | 509 | 0.28 |
| <b>9c</b> | CH <sub>2</sub> Cl <sub>2</sub> | 382 | 496 | 0.67 |
|           | CH <sub>3</sub> CN              | 381 | 500 | 0.54 |
|           | CH <sub>3</sub> OH              | 391 | 510 | 0.30 |
| <b>9d</b> | CH <sub>2</sub> Cl <sub>2</sub> | 376 | 492 | 0.64 |
|           | CH <sub>3</sub> CN              | 380 | 502 | 0.68 |
|           | CH <sub>3</sub> OH              | 391 | 511 | 0.30 |
| <b>9e</b> | CH <sub>2</sub> Cl <sub>2</sub> | 377 | 496 | 0.66 |
|           | CH <sub>3</sub> CN              | 377 | 501 | 0.65 |
|           | CH <sub>3</sub> OH              | 391 | 509 | 0.35 |
| <b>9f</b> | CH <sub>2</sub> Cl <sub>2</sub> | 381 | 496 | 0.53 |
|           | CH <sub>3</sub> CN              | 380 | 499 | 0.57 |

---

|                    |     |     |      |
|--------------------|-----|-----|------|
| CH <sub>3</sub> OH | 389 | 511 | 0.31 |
|--------------------|-----|-----|------|

<sup>a</sup>Determined with reference to quinine sulfate in 0.1M H<sub>2</sub>SO<sub>4</sub> ( $\Phi_F$  0.54). <sup>b</sup>Measured life time in acetonitrile

**Table S2.** Absorbance (A), fluorescence emission area (F) and refractive index ( $\eta$ ) of **9** in different Solvents

| Product   | Solvent                         | Absorbance (A) | Emission area (F) | Refractive index ( $\eta$ ) |
|-----------|---------------------------------|----------------|-------------------|-----------------------------|
| <b>9a</b> | CH <sub>3</sub> CN              | 0.172          | 59521             | 1.3460                      |
|           | CH <sub>2</sub> Cl <sub>2</sub> | 0.105          | 33140             | 1.4242                      |
|           | MeOH                            | 0.105          | 17695             | 1.3314                      |
| <b>9b</b> | CH <sub>3</sub> CN              | 0.095          | 40667             | 1.3460                      |
|           | CH <sub>2</sub> Cl <sub>2</sub> | 0.110          | 34254             | 1.4242                      |
|           | MeOH                            | 0.093          | 19166             | 1.3314                      |
| <b>9c</b> | CH <sub>3</sub> CN              | 0.128          | 51617             | 1.3460                      |
|           | CH <sub>2</sub> Cl <sub>2</sub> | 0.097          | 46373             | 1.4242                      |
|           | MeOH                            | 0.112          | 24971             | 1.3314                      |
| <b>9d</b> | CH <sub>3</sub> CN              | 0.081          | 41037             | 1.3460                      |
|           | CH <sub>2</sub> Cl <sub>2</sub> | 0.092          | 43734             | 1.4242                      |
|           | MeOH                            | 0.091          | 20594             | 1.3314                      |
| <b>9e</b> | CH <sub>3</sub> CN              | 0.125          | 60388             | 1.3460                      |
|           | CH <sub>2</sub> Cl <sub>2</sub> | 0.091          | 44923             | 1.4242                      |
|           | MeOH                            | 0.081          | 21298             | 1.3314                      |
| <b>9f</b> | CH <sub>3</sub> CN              | 0.134          | 56876             | 1.3460                      |
|           | CH <sub>2</sub> Cl <sub>2</sub> | 0.146          | 58046             | 1.4242                      |
|           | MeOH                            | 0.098          | 22459             | 1.3314                      |

#### Related reference.

(1) D. F. Eaton, *Pure & Appl. Chem.* **1988**, 60 (7), 1107.

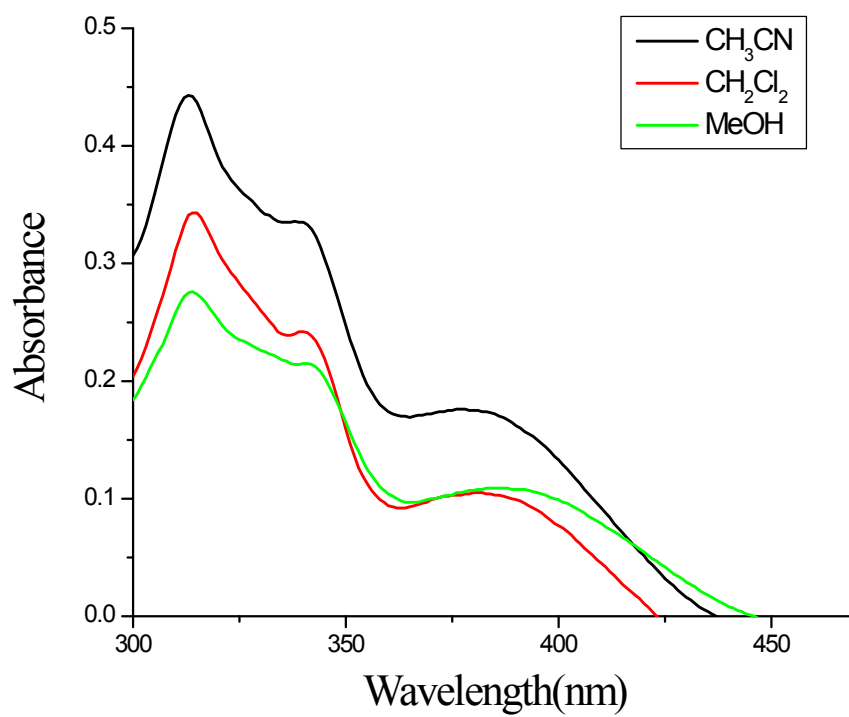

**Fig. S1** UV-vis absorption spectra of compound **9a** in different solvents ( $[9a] = \sim 2 \times 10^{-5}$  M).

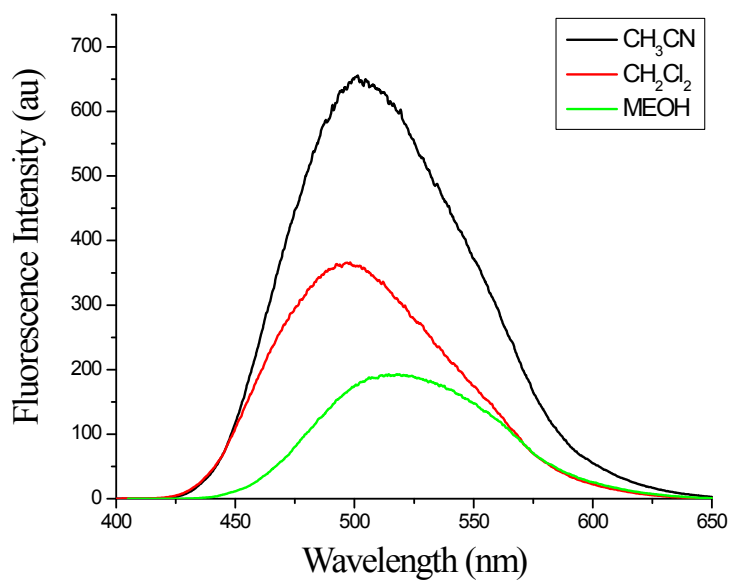

**Fig. S2.** Fluorescence emission spectra of **9a** in different solvents ( $[9a] = \sim 2 \times 10^{-5}$  M).

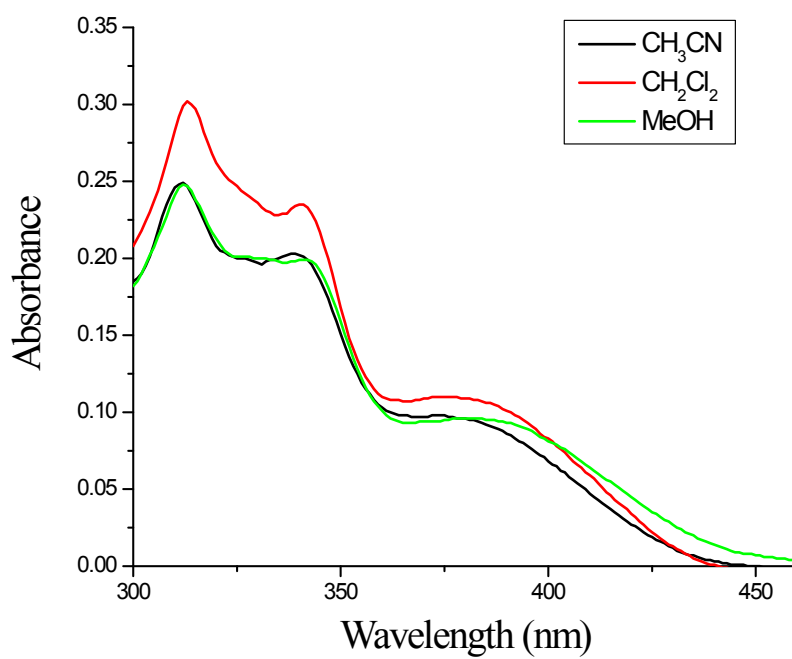

**Fig. S3** UV-vis absorption spectra of compound **9b** in different solvents ( $[\mathbf{9b}] = \sim 2 \times 10^{-5}$  M).

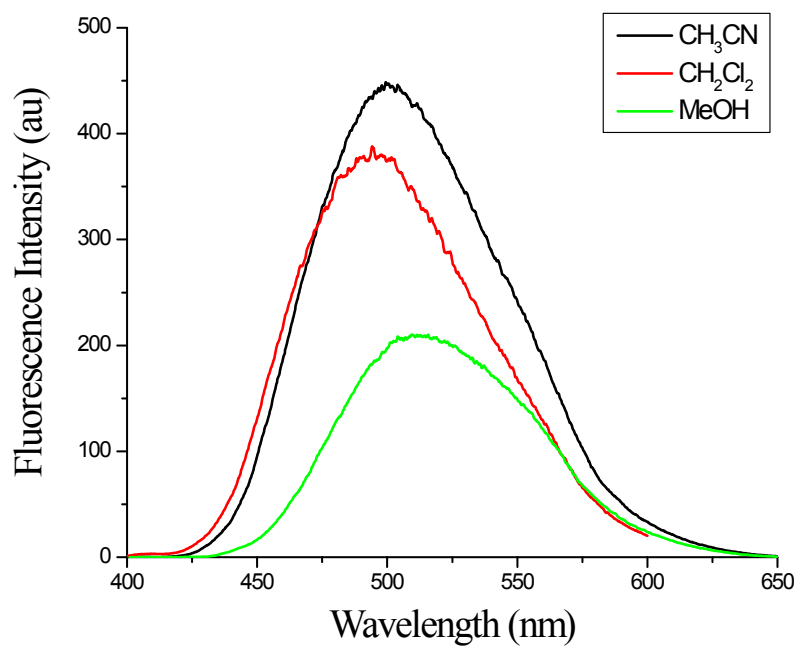

**Fig. S4** Fluorescence emission spectra of **9b** in different solvents ( $[\mathbf{9b}] = \sim 2 \times 10^{-5}$  M).

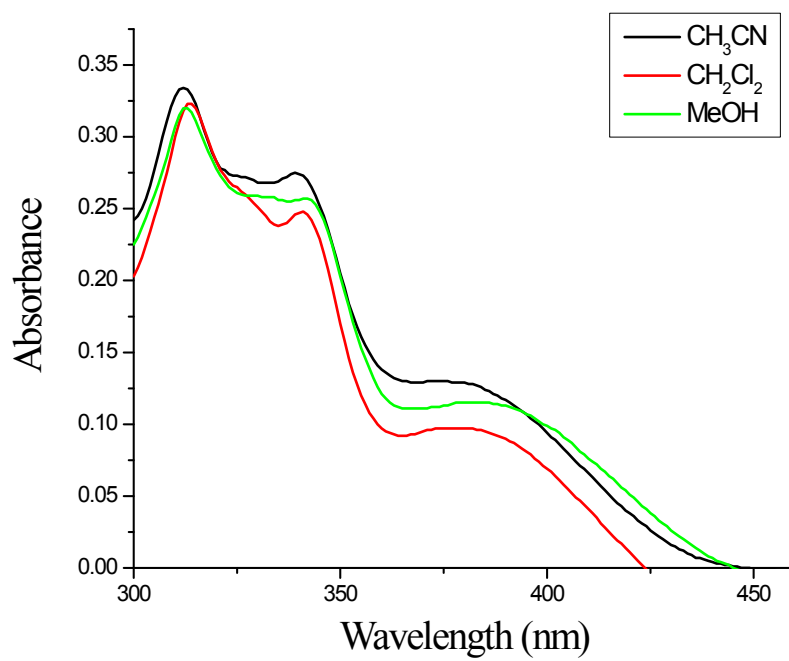

**Fig. S5** UV-vis absorption spectra of compound **9c** in different solvents ( $[\mathbf{9c}] = \sim 2 \times 10^{-5}$  M).

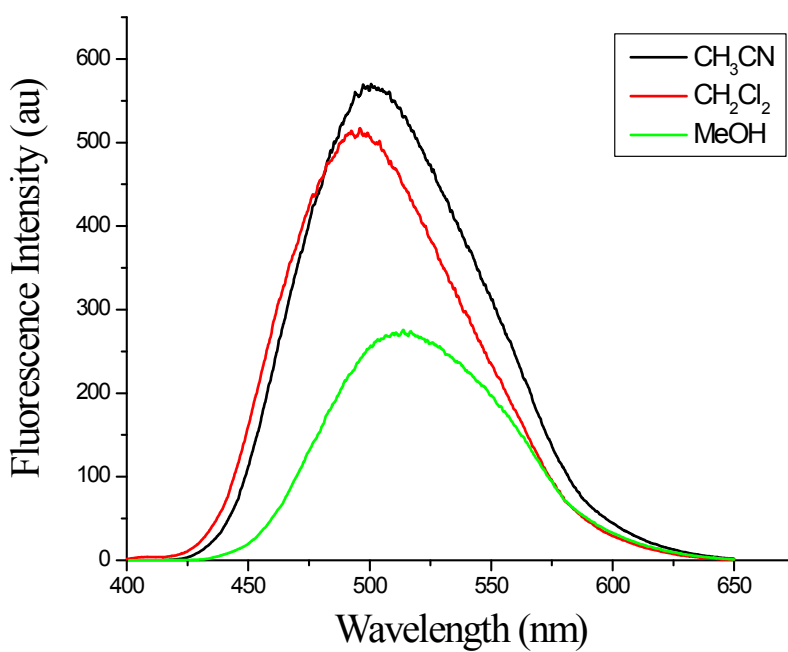

**Fig. S6** Fluorescence emission spectra of **9c** in different solvents ( $[\mathbf{9c}] = \sim 2 \times 10^{-5}$  M).

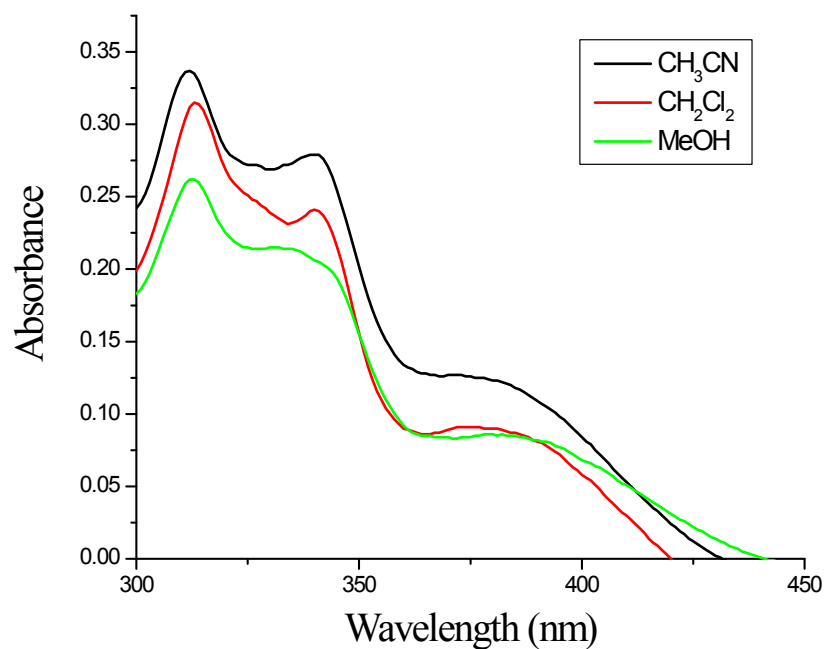

**Fig. S7** UV-vis absorption spectra of compound **9e** in different solvents ( $[\mathbf{9e}] = \sim 2 \times 10^{-5} \text{ M}$ ).

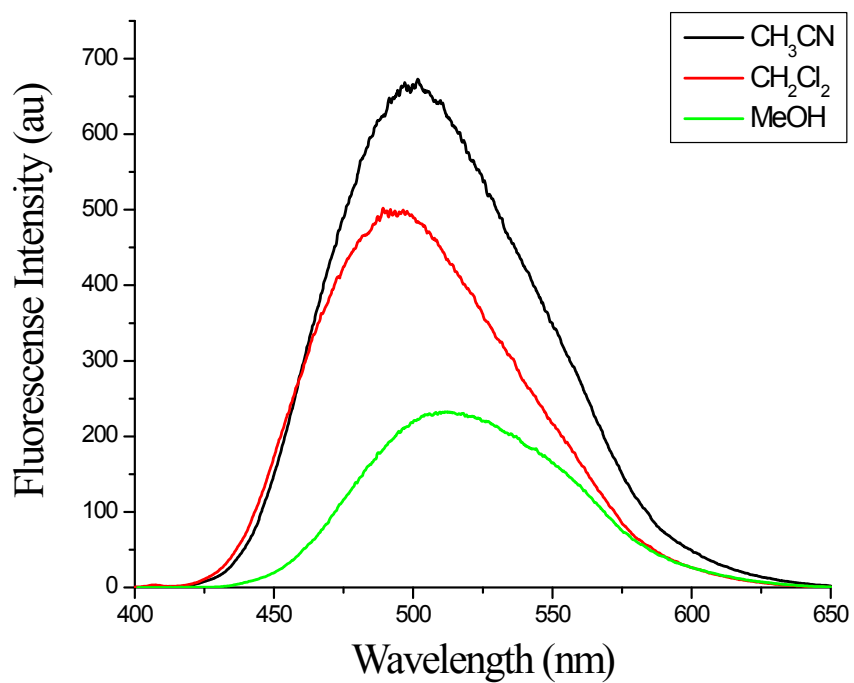

**Fig. S8** Fluorescence emission spectra of **9e** in different solvents ( $[\mathbf{9e}] = \sim 2 \times 10^{-5} \text{ M}$ ).

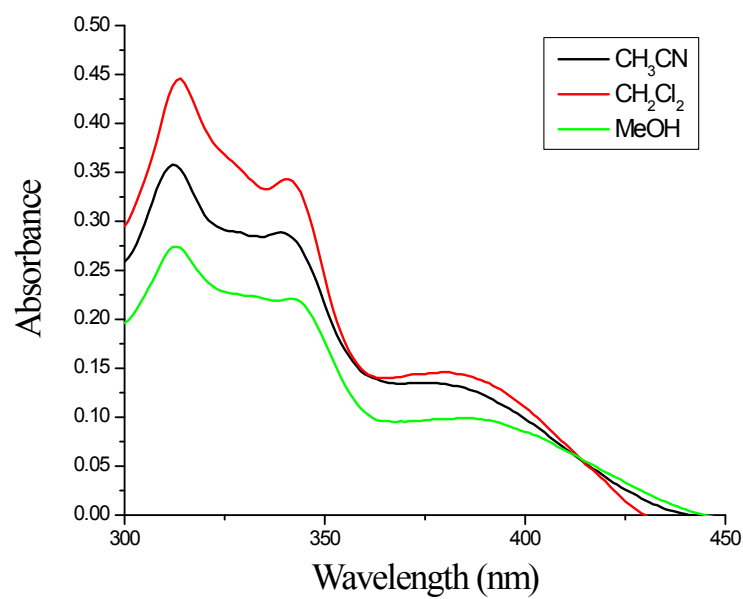

**Fig. S9** UV-vis absorption spectra of compound **9f** in different solvents ( $[\mathbf{9f}] = \sim 2 \times 10^{-5} \text{ M}$ ).

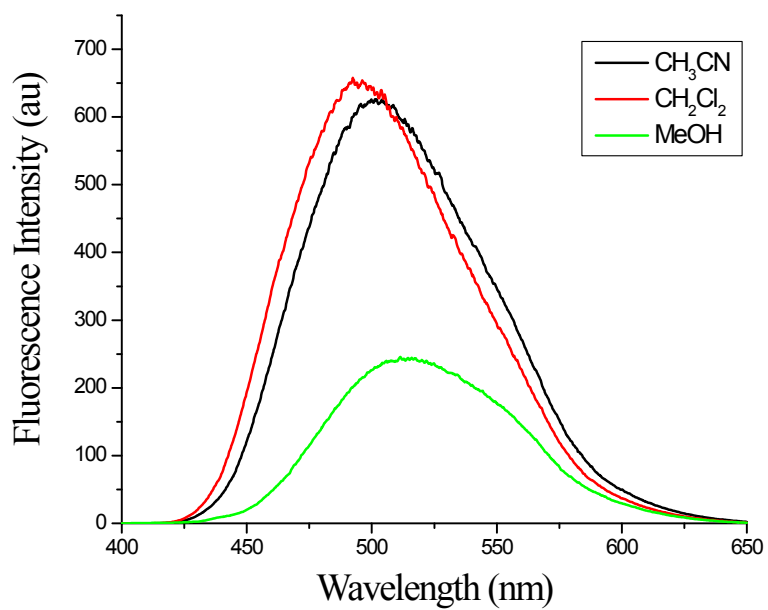

**Fig. S10** Fluorescence emission spectra of **9f** in different solvents ( $[\mathbf{9f}] = \sim 2 \times 10^{-5} \text{ M}$ ).

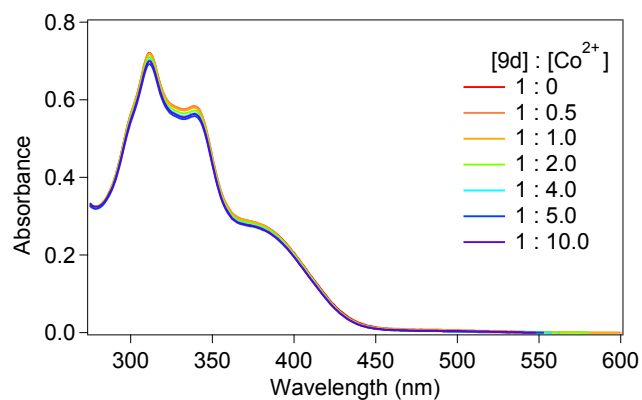

(a)

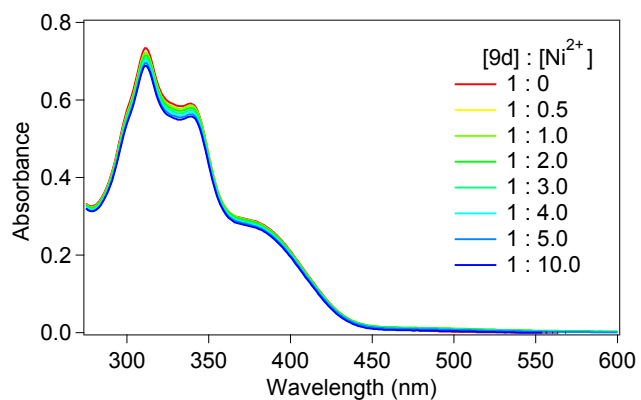

(b)

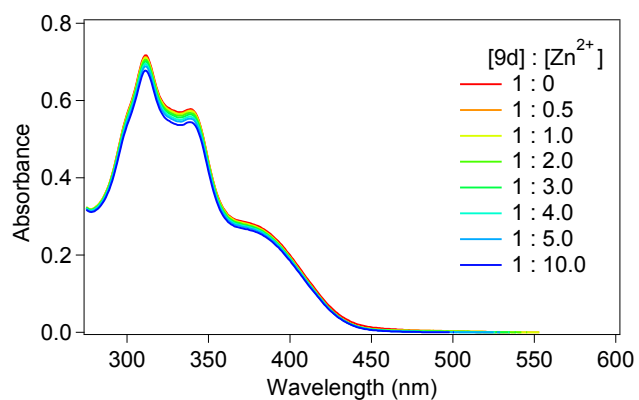

(c)

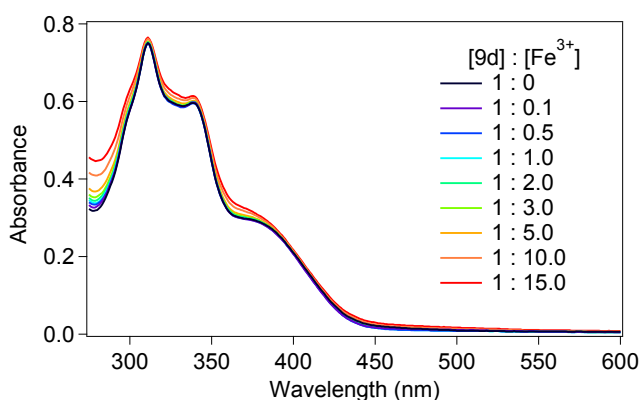

(d)

**Fig. S11** Absorption spectra of **9d** in acetonitrile with increasing concentration of metal ions (a)  $\text{Co}^{2+}$ , (b)  $\text{Ni}^{2+}$ , (c)  $\text{Zn}^{2+}$  and (d)  $\text{Fe}^{3+}$ .

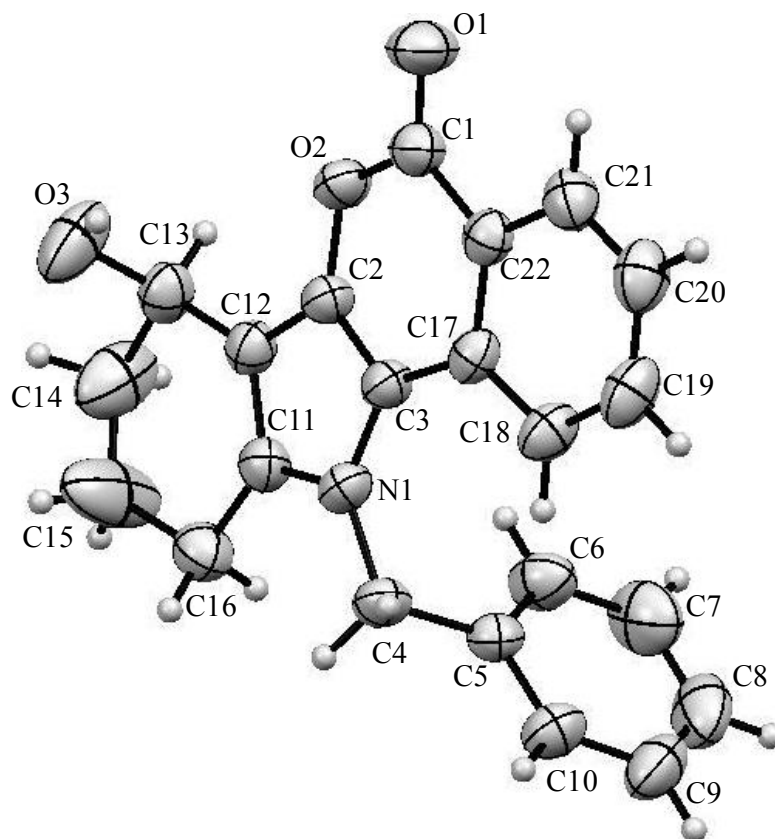

**Fig. S12** ORTEP diagram of X-ray crystal structure of isocoumarin derivative **4a** where carbonyl group is reduced by  $\text{NaBH}_4$  (CCDC number 940457).

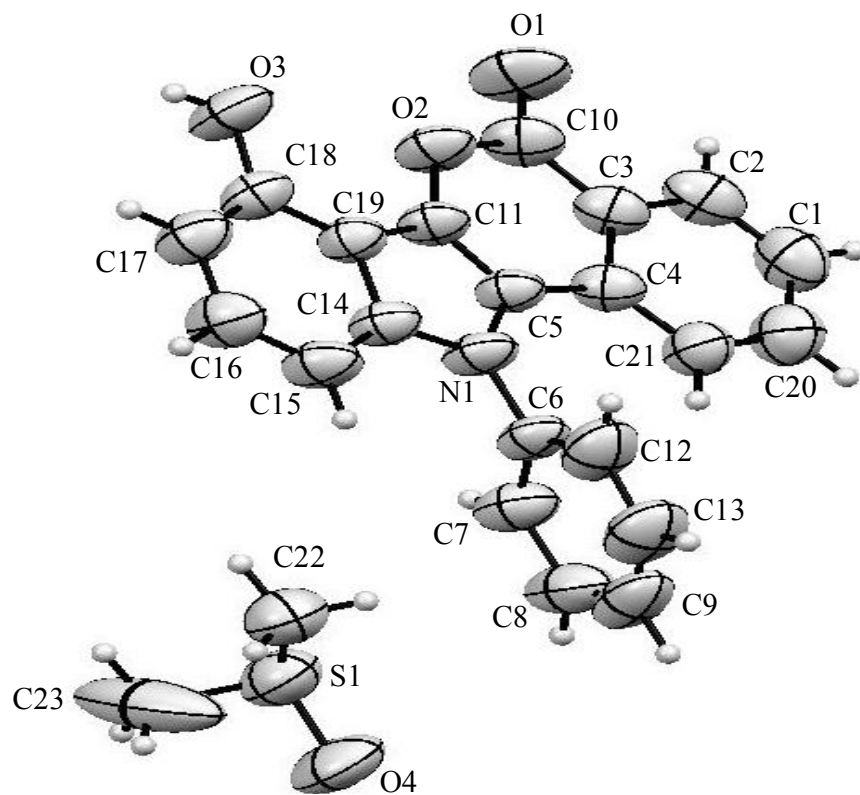

**Fig. S13** ORTEP diagram of X-ray crystal structure of hydroxylindole fused isocoumarin **9b** with atom numbering scheme (CCDC number 940783).

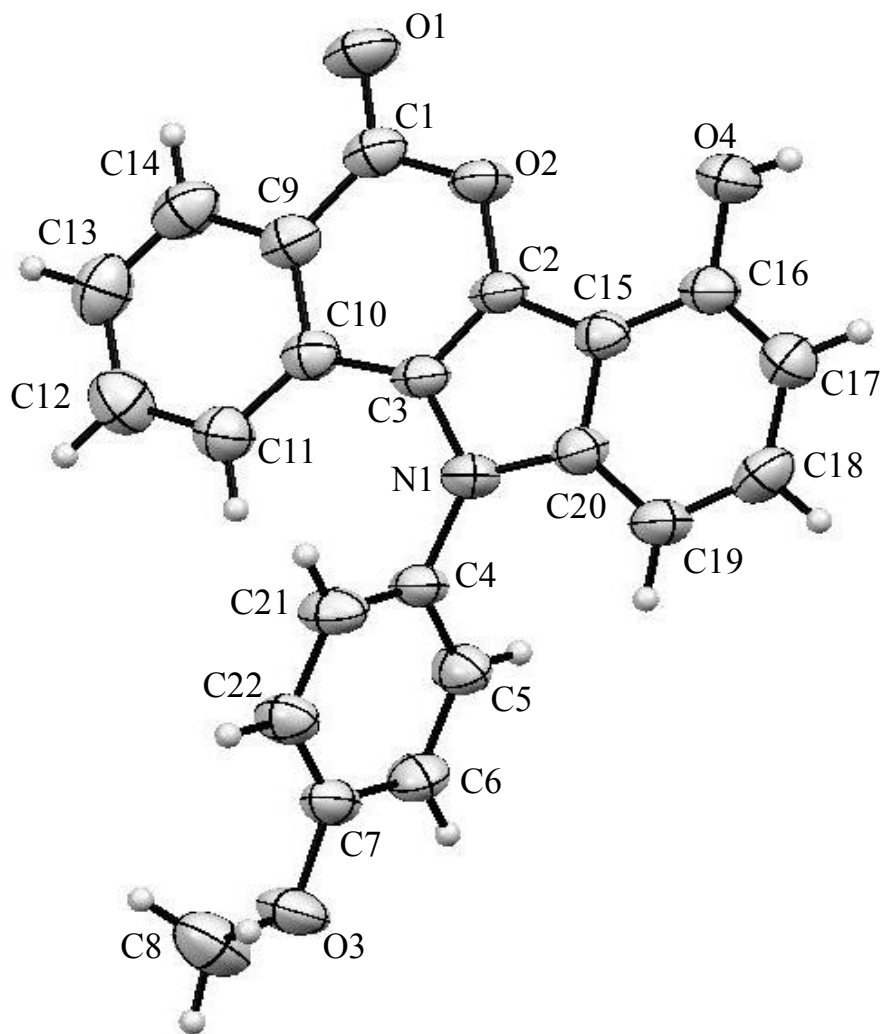

**Fig. S14** ORTEP diagram of X-ray crystal structure of hydroxylindole fused isocoumarin **9f** with atom numbering scheme (CCDC number 940459).

### X-ray crystal structure analyses

#### Crystal data

**Compound 2a:**  $C_{22}H_{17}N_1O_3 \cdot C_6H_7N_1$ ,  $M = 436.49$ , monoclinic,  $a = 20.4475(13) \text{ \AA}$ ,  $b = 14.4995(10) \text{ \AA}$ ,  $c = 13.9270(9) \text{ \AA}$ ,  $\alpha = 90.00^\circ$ ,  $\beta = 106.072(2)^\circ$ ,  $\gamma = 90.00^\circ$ ,  $V = 3967.7(5) \text{ \AA}^3$ ,  $T = 293(2) \text{ K}$ , space group  $C2/c$ ,  $Z = 7$ ,  $\mu(\text{MoK}\alpha) = 0.084 \text{ mm}^{-1}$ , 24613 reflections measured, 4530 independent reflections ( $R_{\text{int}} = 0.0387$ ). The final  $R$  values were 0.0438 ( $I > 2\sigma(I)$ ). The final

$wR(F2)$  values were 0.1043 ( $I > 2\sigma(I)$ ). The final  $R1$  values were 0.0761 (all data). The final  $wR(F2)$  values were 0.1182 (all data). The goodness of fit on  $F2$  was 1.034. CCDC number 940456.

**Compound 4a:**  $C_{22}H_{16}N_1O_3$ ,  $M = 342.36$ , monoclinic,  $a = 13.5527(18) \text{ \AA}$ ,  $b = 8.7440(12) \text{ \AA}$ ,  $c = 14.7881(19) \text{ \AA}$ ,  $\alpha = 90.00^\circ$ ,  $\beta = 104.612(4)^\circ$ ,  $\gamma = 90.00^\circ$ ,  $V = 1695.8(4) \text{ \AA}^3$ ,  $T = 296(2) \text{ K}$ , space group  $P2(1)/n$ ,  $Z = 4$ ,  $\mu(\text{MoK}\alpha) = 0.090 \text{ mm}^{-1}$ , 20680 reflections measured, 3875 independent reflections ( $R_{\text{int}} = 0.0268$ ). The final  $R1$  values were 0.0719 ( $I > 2\sigma(I)$ ). The final  $wR(F2)$  values were 0.2021 ( $I > 2\sigma(I)$ ). The final  $R1$  values were 0.0881 (all data). The final  $wR(F2)$  values were 0.2143 (all data). The goodness of fit on  $F2$  was 0.975. CCDC number 940457.

**Compound 9b:**  $C_{23}H_{19}N_1O_4S_1$ ,  $M = 405.45$ , Triclinic,  $a = 9.6997(6) \text{ \AA}$ ,  $b = 10.1012(6) \text{ \AA}$ ,  $c = 11.3180(12) \text{ \AA}$ ,  $\alpha = 96.209(3)^\circ$ ,  $\beta = 93.831(3)^\circ$ ,  $\gamma = 114.279(2)^\circ$ ,  $V = 997.31(14) \text{ \AA}^3$ ,  $T = 296(2) \text{ K}$ , space group  $P-1$ ,  $Z = 2$ ,  $\mu(\text{MoK}\alpha) = 0.192 \text{ mm}^{-1}$ , 10955 reflections measured, 3329 independent reflections ( $R_{\text{int}} = 0.0304$ ). The final  $R1$  values were 0.0949 ( $I > 2\sigma(I)$ ). The final  $wR(F2)$  values were 0.2850 ( $I > 2\sigma(I)$ ). The final  $R1$  values were 0.0949 (all data). The final  $wR(F2)$  values were 0.3187 (all data). The goodness of fit on  $F2$  was 1.016. CCDC number 940478.

**Compound 9c:**  $C_{24}H_{21}NO_4S_1$ ,  $M = 419.48$ , triclinic,  $a = 9.8359(7) \text{ \AA}$ ,  $b = 9.8990(7) \text{ \AA}$ ,  $c = 11.8318(8) \text{ \AA}$ ,  $\alpha = 98.474(2)^\circ$ ,  $\beta = 91.399(2)^\circ$ ,  $\gamma = 112.007(2)^\circ$ ,  $V = 1052.42(13) \text{ \AA}^3$ ,  $T = 296(2) \text{ K}$ , space group  $P-1$ ,  $Z = 2$ ,  $\mu(\text{MoK}\alpha) = 0.184 \text{ mm}^{-1}$ , 10390 reflections measured, 3023 independent reflections ( $R_{\text{int}} = 0.0245$ ). The final  $R1$  values were 0.0783 ( $I > 2\sigma(I)$ ). The final  $wR(F2)$  values were 0.2300 ( $I > 2\sigma(I)$ ). The final  $R1$  values were 0.0900 (all data). The final  $wR(F2)$  values were 0.2455 (all data). The goodness of fit on  $F2$  was 1.051. CCDC number 940458.

**Compound 9f:** C<sub>22</sub>H<sub>19</sub>N<sub>1</sub>O<sub>6</sub>, M= 393.38, Triclinic,  $a = 9.125(8) \text{ \AA}$ ,  $b = 10.294(8) \text{ \AA}$ ,  $c = 10.848(9) \text{ \AA}$ ,  $\alpha = 87.62(4)^\circ$ ,  $\beta = 87.11(3)^\circ$ ,  $\gamma = 66.42(3)^\circ$ ,  $V = 932.5(14) \text{ \AA}^3$ ,  $T = 296(2) \text{ K}$ , space group  $P-1$ ,  $Z = 2$ ,  $\mu(\text{MoK}\alpha) = 0.103 \text{ mm}^{-1}$ , 11248 reflections measured, 3760 independent reflections ( $R_{\text{int}} = 0.0656$ ). The final  $R$  values were 0.0688 ( $I > 2\sigma(I)$ ). The final  $wR(F2)$  values were 0.1814 ( $I > 2\sigma(I)$ ). The final  $R$  values were 0.1250 (all data). The final  $wR(F2)$  values were 0.2098 (all data). The goodness of fit on  $F2$  was 1.041. CCDC number 940459.

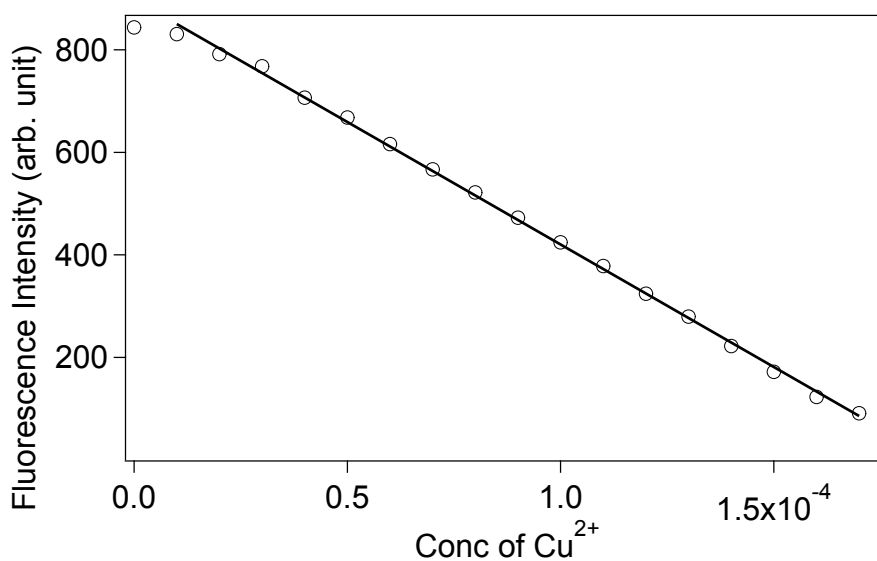

Fig. S15 Change in fluorescence intensity of **9d** in acetonitrile upon addition of Cu<sup>2+</sup>

### Calculation of limit of detection

The limit of detection of Cu<sup>2+</sup> has been determined from fluorescence titration curves. 15-20 blank measurements (in absence of metal ion) have been measured over an extended period of time and the standard deviation corresponding to the blank measurements have been calculated. Calibration curve has been obtained by plotting fluorescence intensity against metal (Cu<sup>2+</sup>) concentration. Finally the limit of detection has been calculated using the following equation

$$C_L = k \times S_b / S$$

$C_L$  is the detection limit

$K$  has been taken as 3

$S_b$  is the standard deviation of the blank measurements

$S$  is the slope of the calibration curve

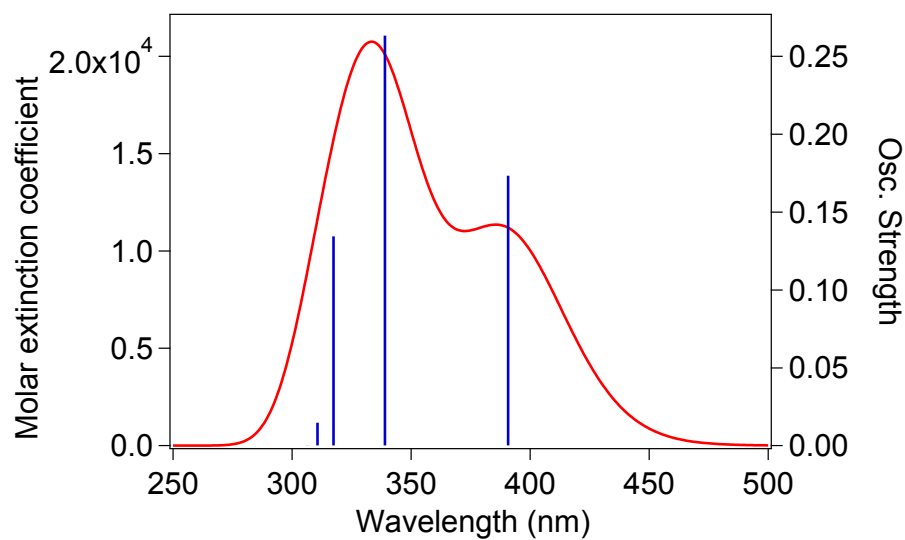

**Fig. S16** Theoretically simulated UV-Vis spectra (molar exc. coefficient vs wavelength) of **9d** in methanol solvent (red curve). UV-Vis peak half width at half height = 0.22eV. The blue lines indicate the the oscillator strength for the transitions to theoretically calculated excited states.

**General Information:**

Starting materials and solvents were purchased from commercial suppliers and used without further purification. Melting points were determined in open capillary tubes and were uncorrected. IR spectra were recorded on a Perkin-Elmer 782 spectrophotometer.  $^1\text{H}$  (300 MHz) and  $^{13}\text{C}$  NMR (75 MHz) spectra were recorded on Bruker 300 MHz instrument in  $[\text{D}_6]\text{DMSO}$ . Elemental analyses (C, H and N) were performed using Perkin-Elmer 240C elemental analyzer. HRMS was performed with a QTOF I (quadrupole-hexapole-TOF) mass spectrometer. The X-ray diffraction data for crystallized compounds were collected with  $\text{MoK}\alpha$  radiation at 296K using the Bruker APEX-II CCD System. The crystals were positioned at 50 mm from the CCD. Frames were measured with a counting time of 5s. Data analyses were carried out with the Bruker APEX2 and Bruker SAINT program. The structures were solved using direct methods with the Shelxs97 program (Sheldrick, 2008).

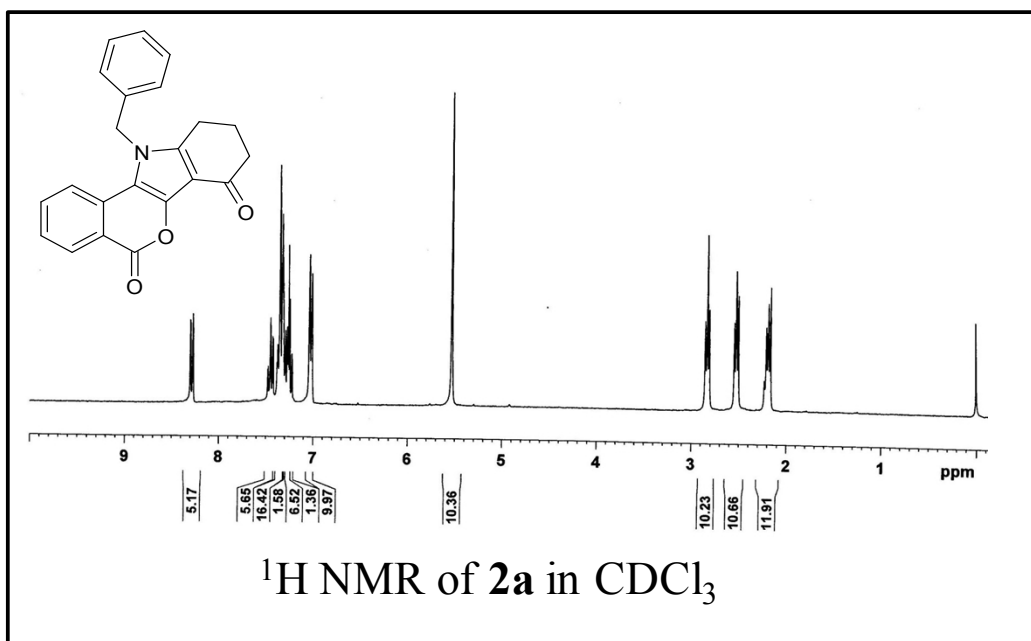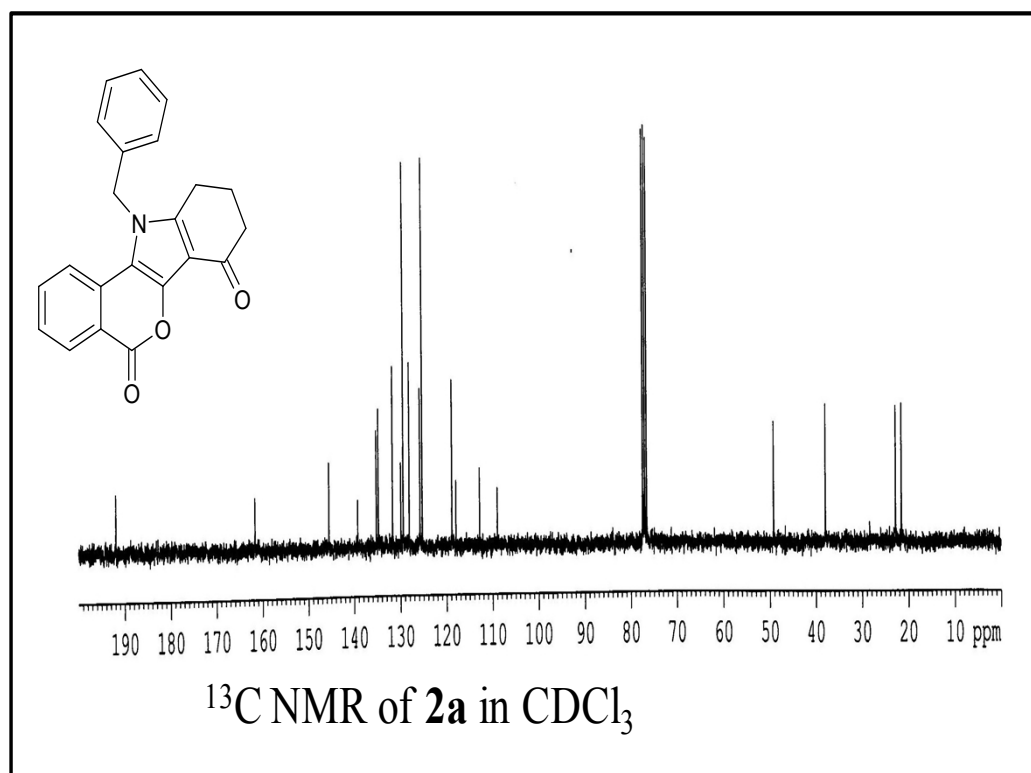

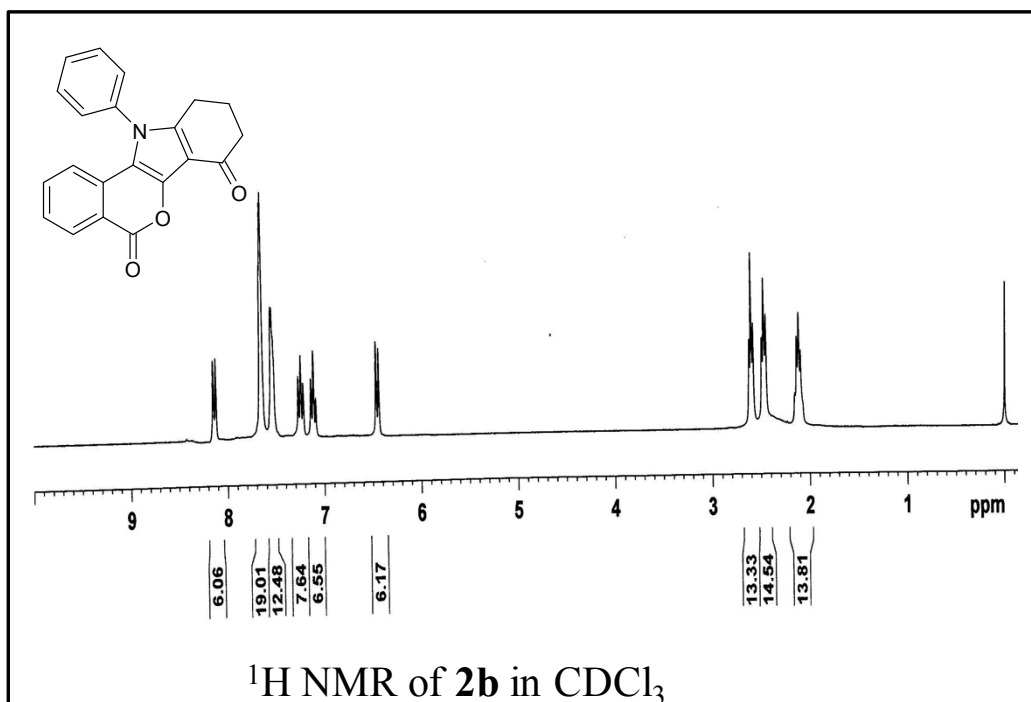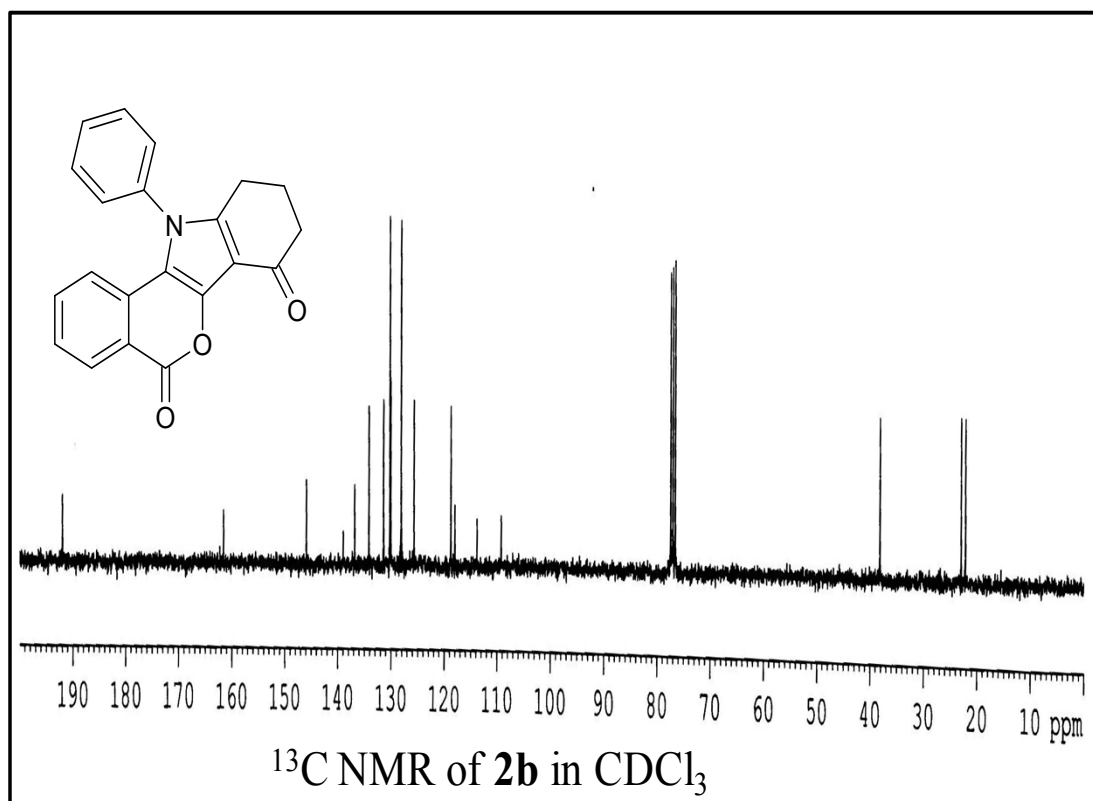

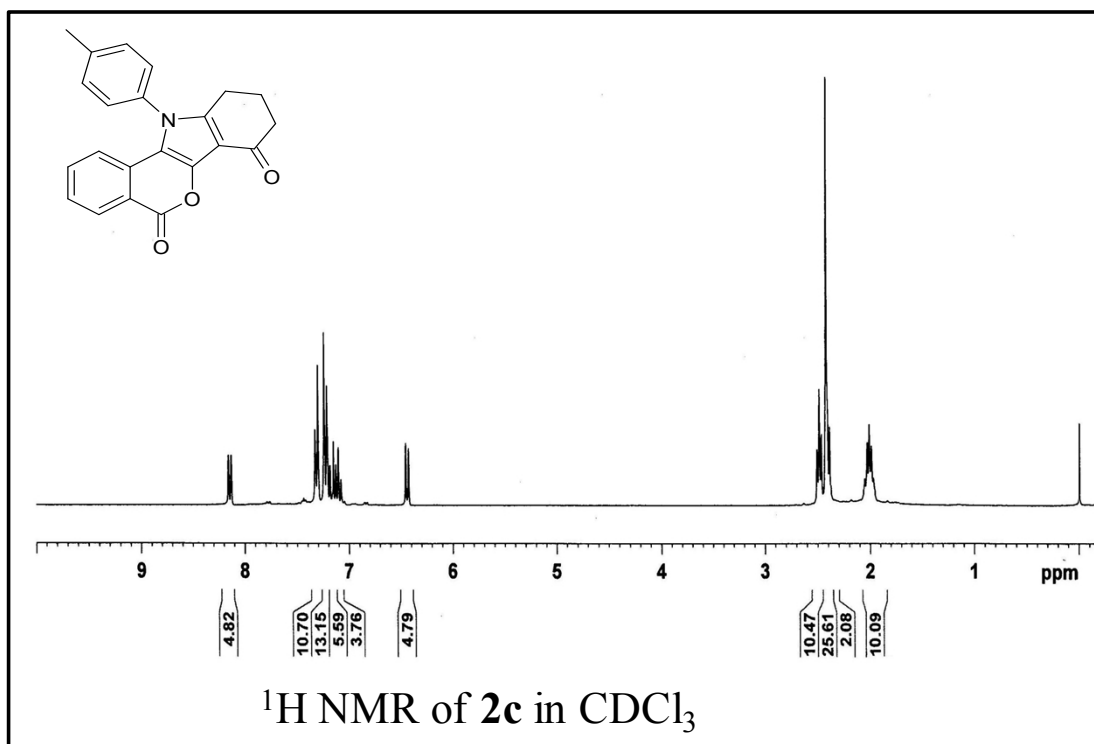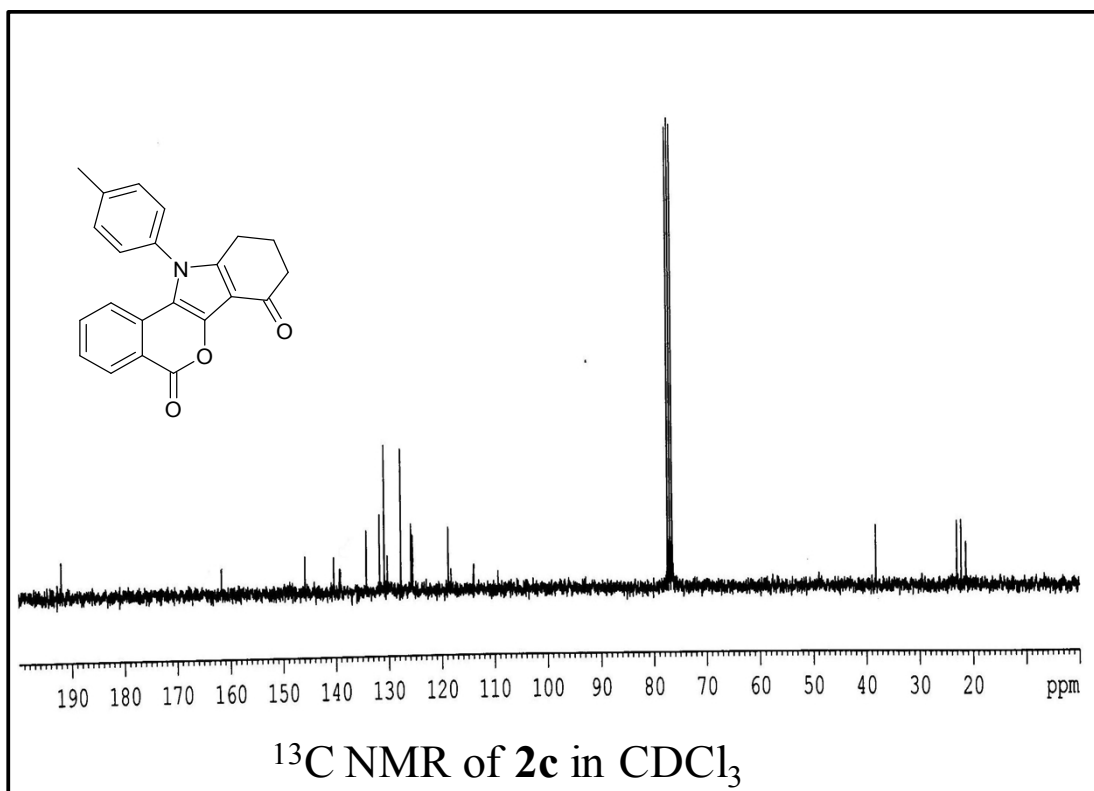

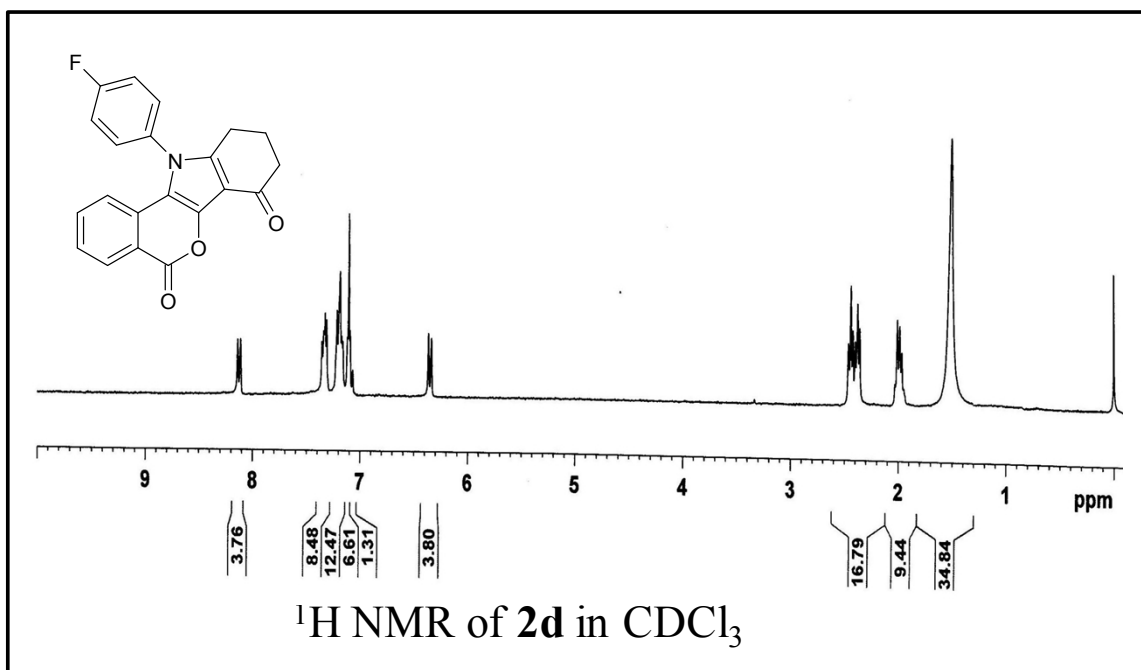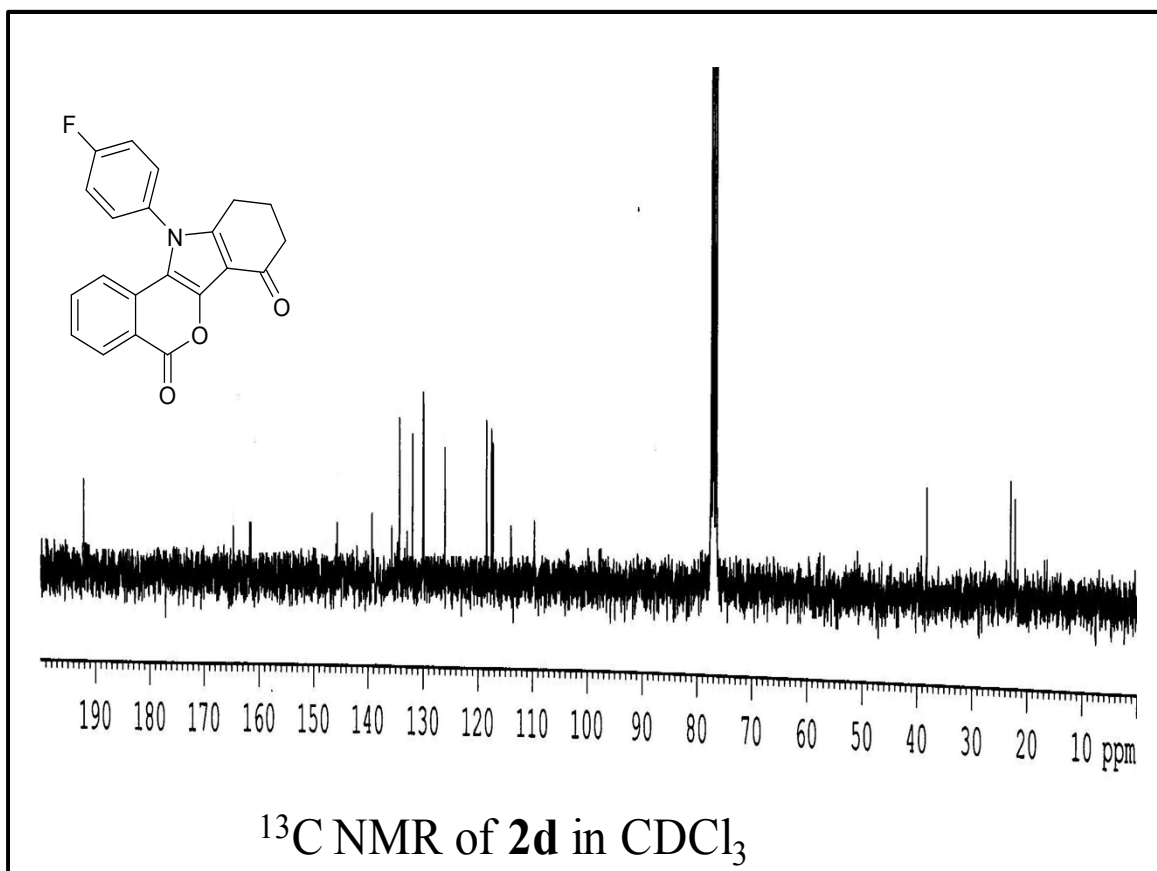

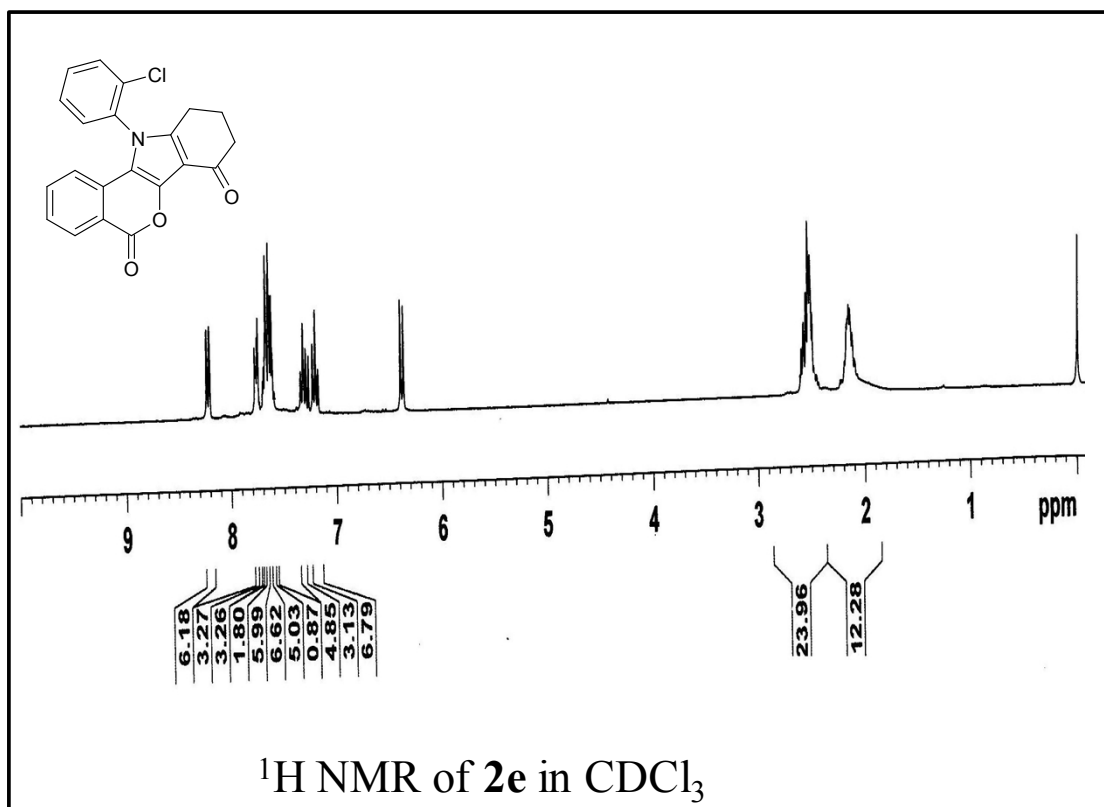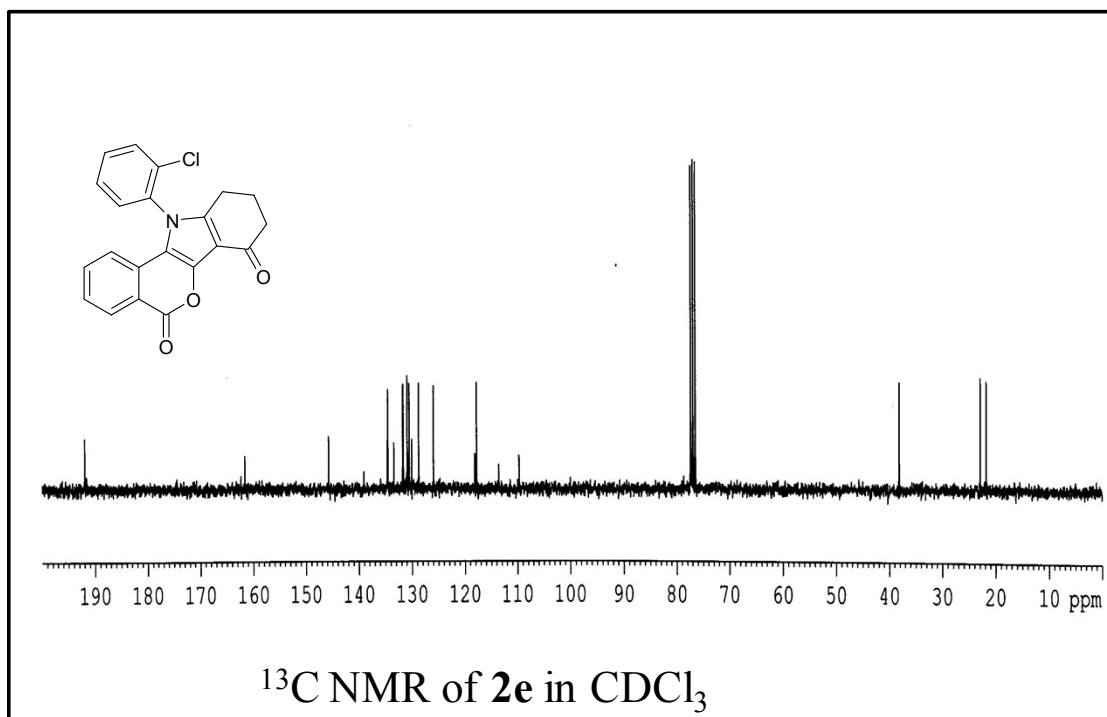

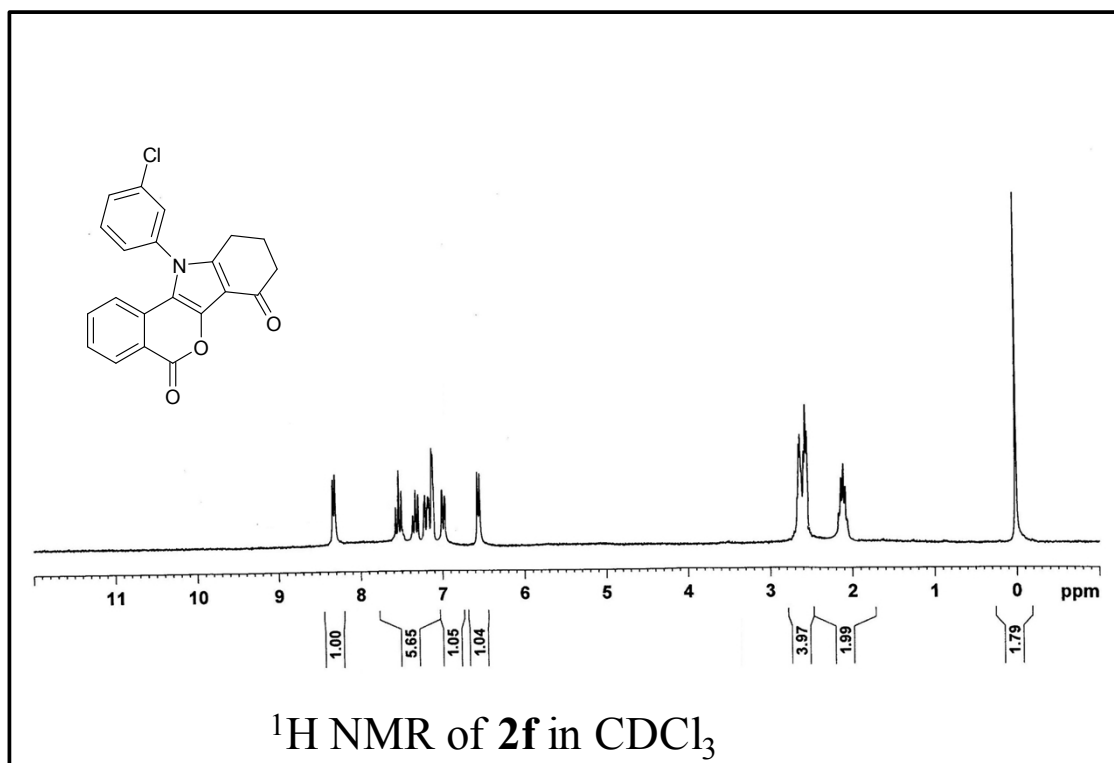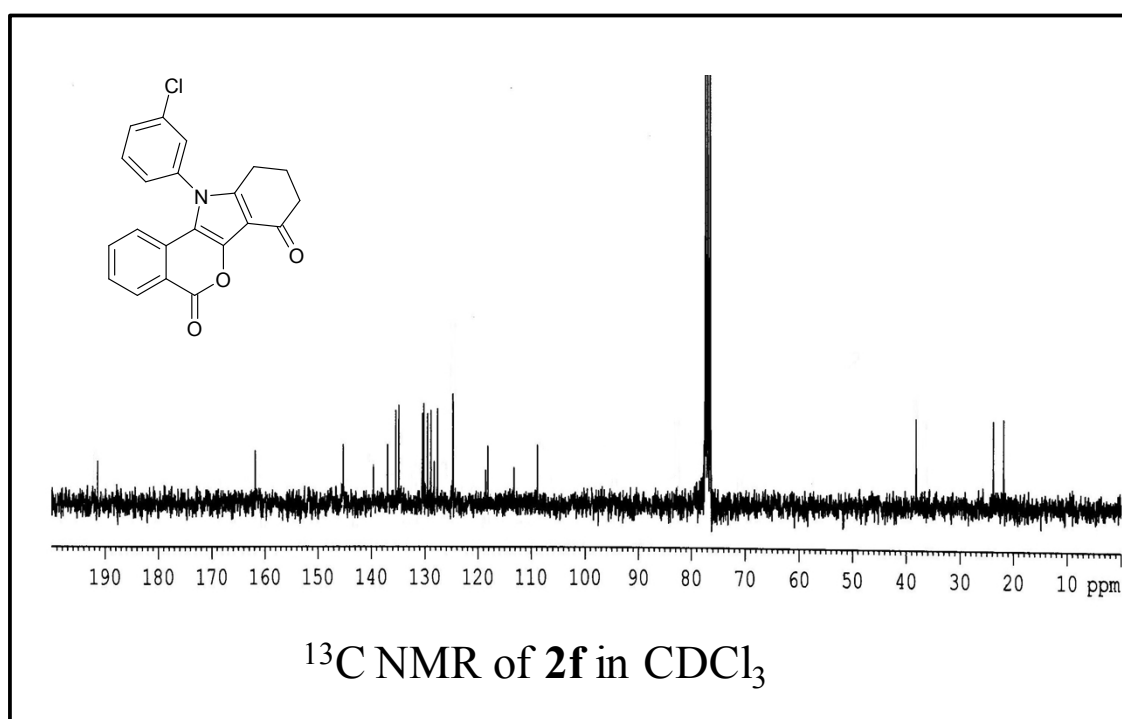

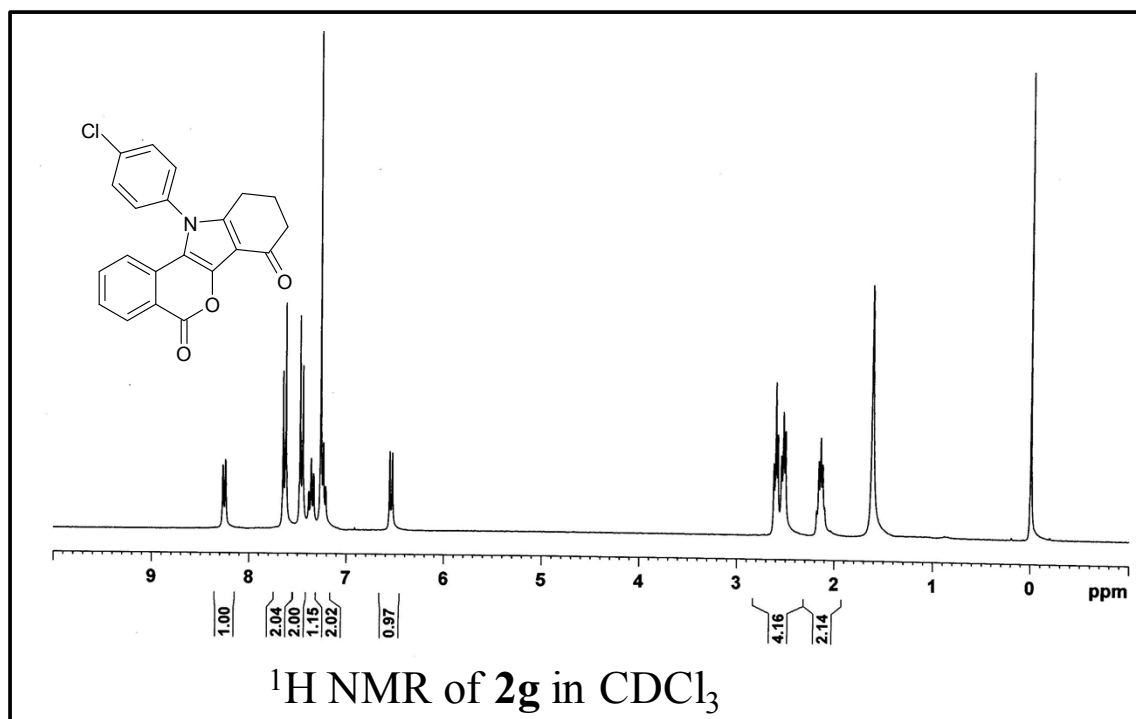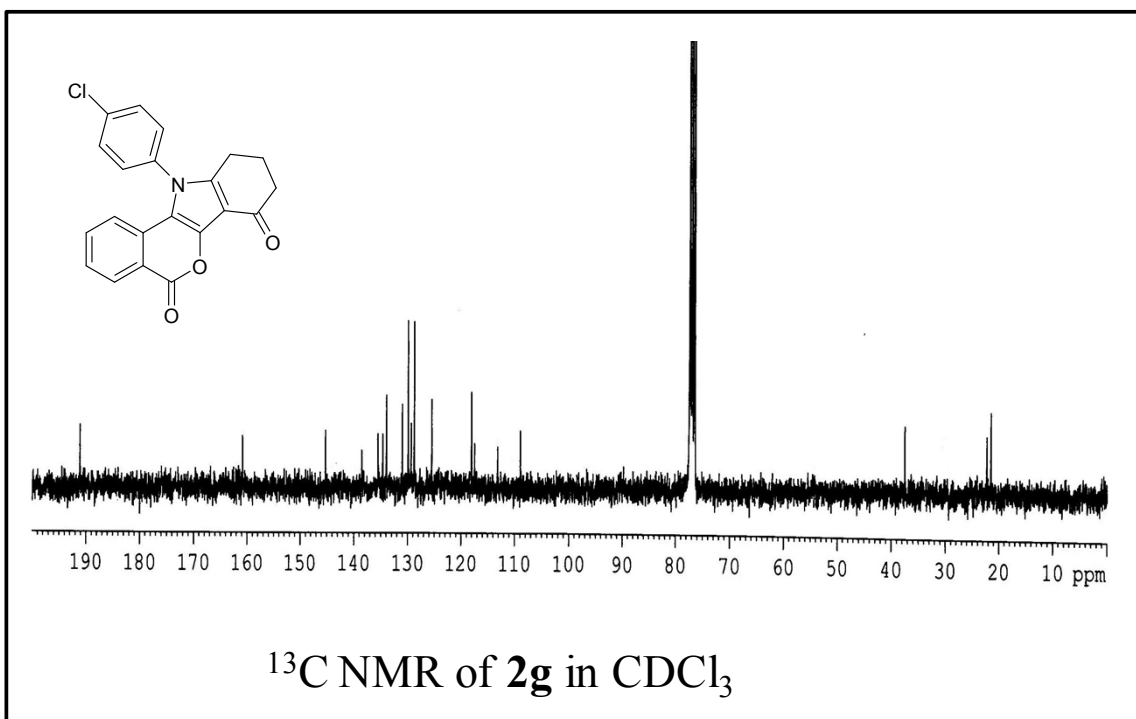

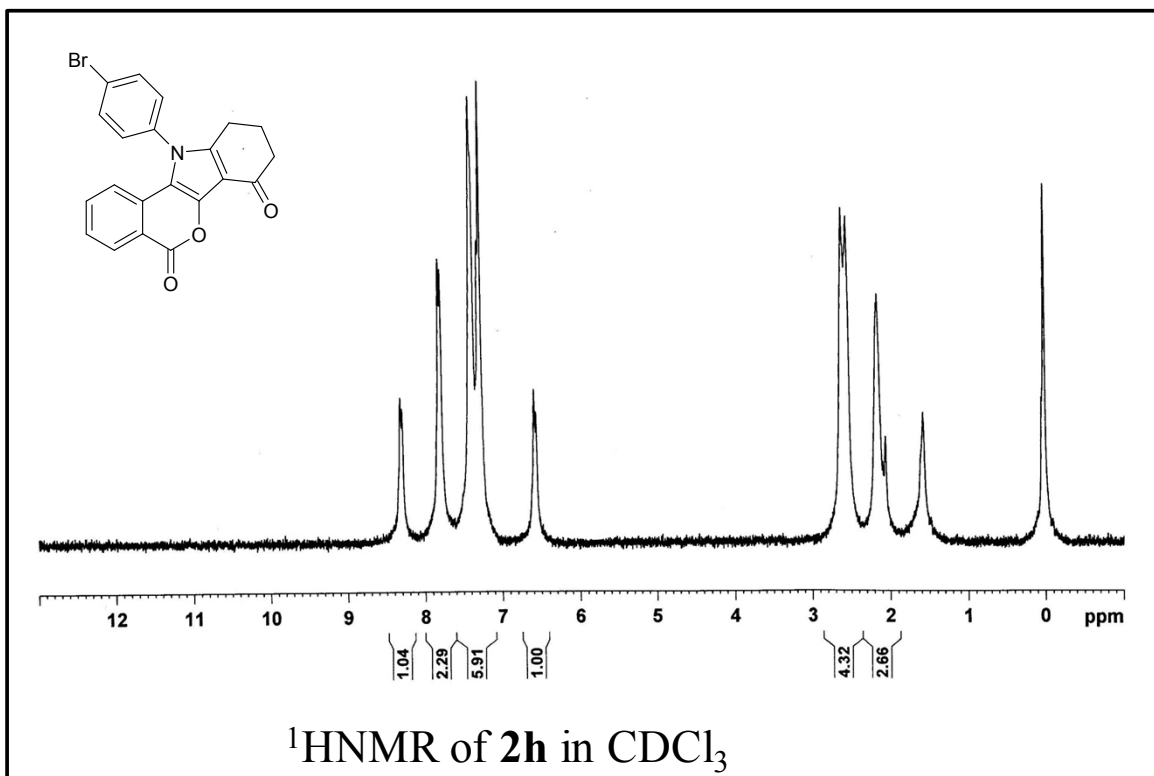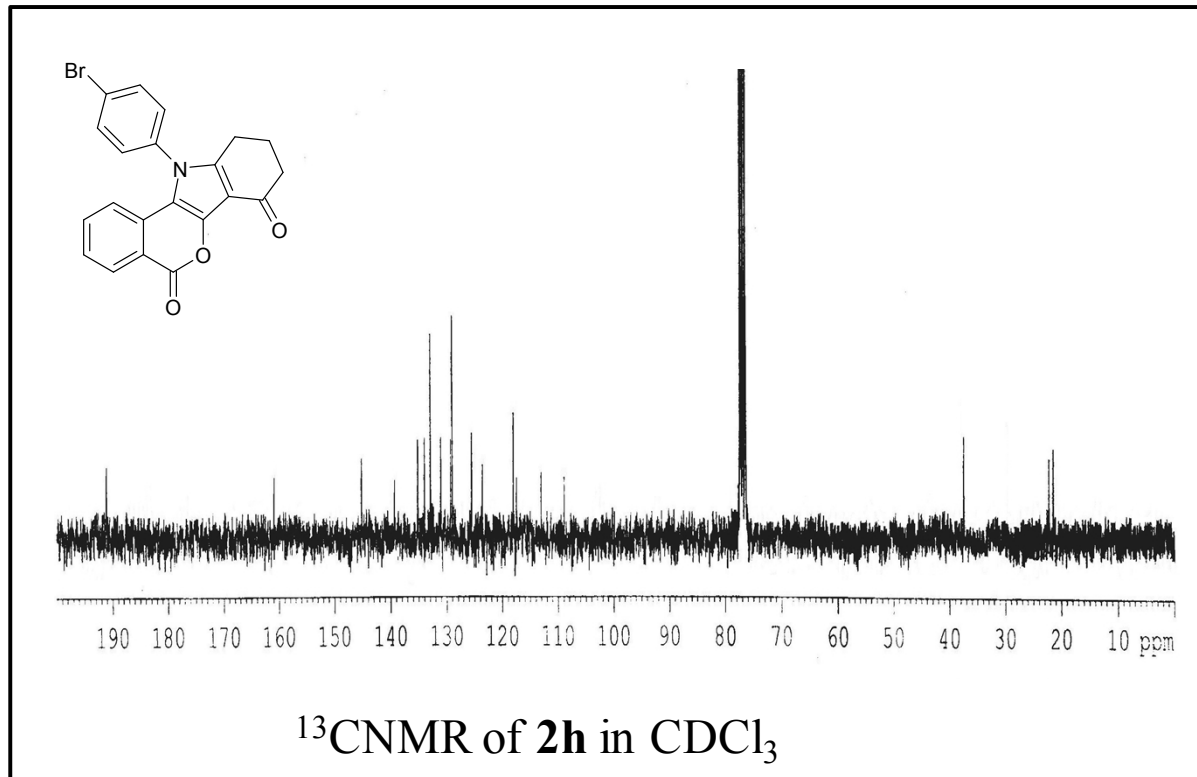

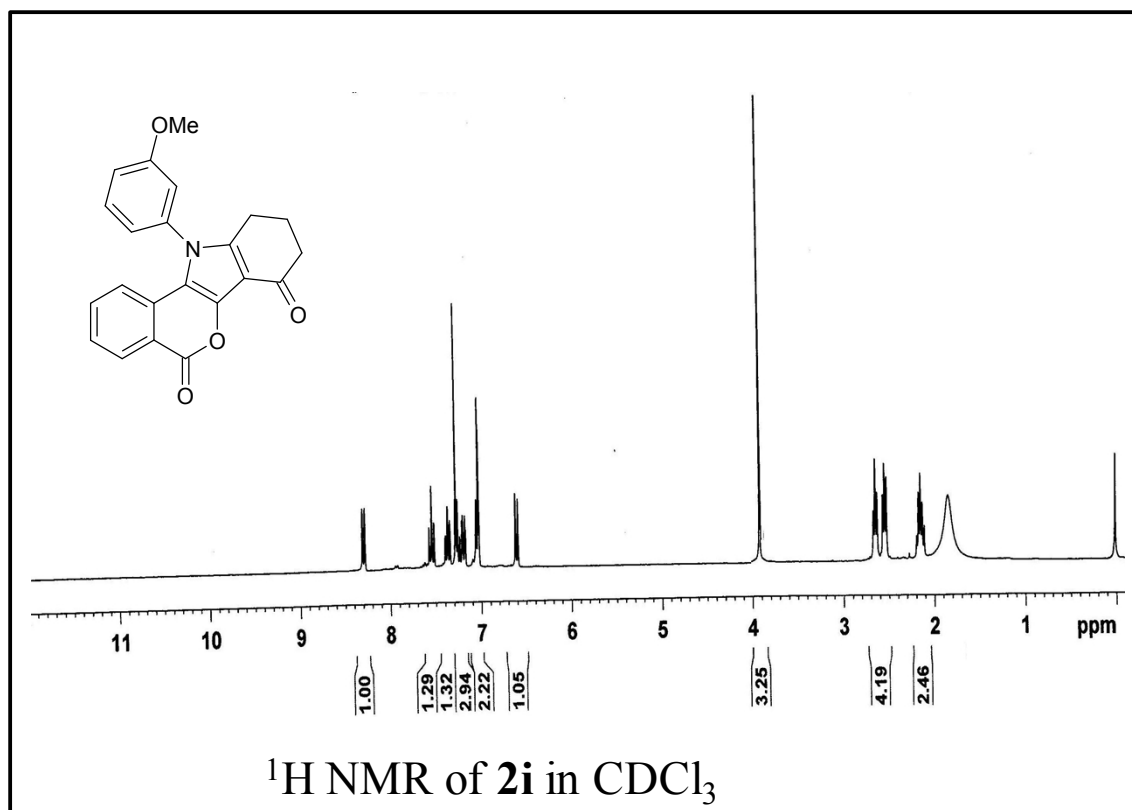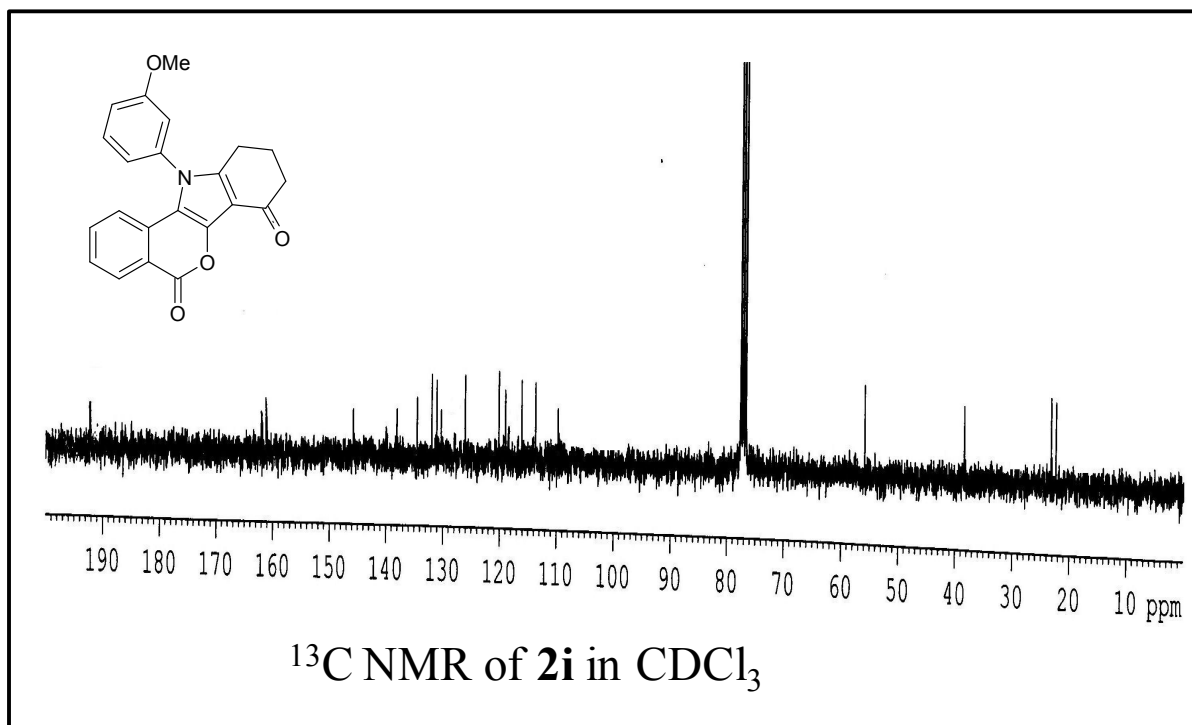

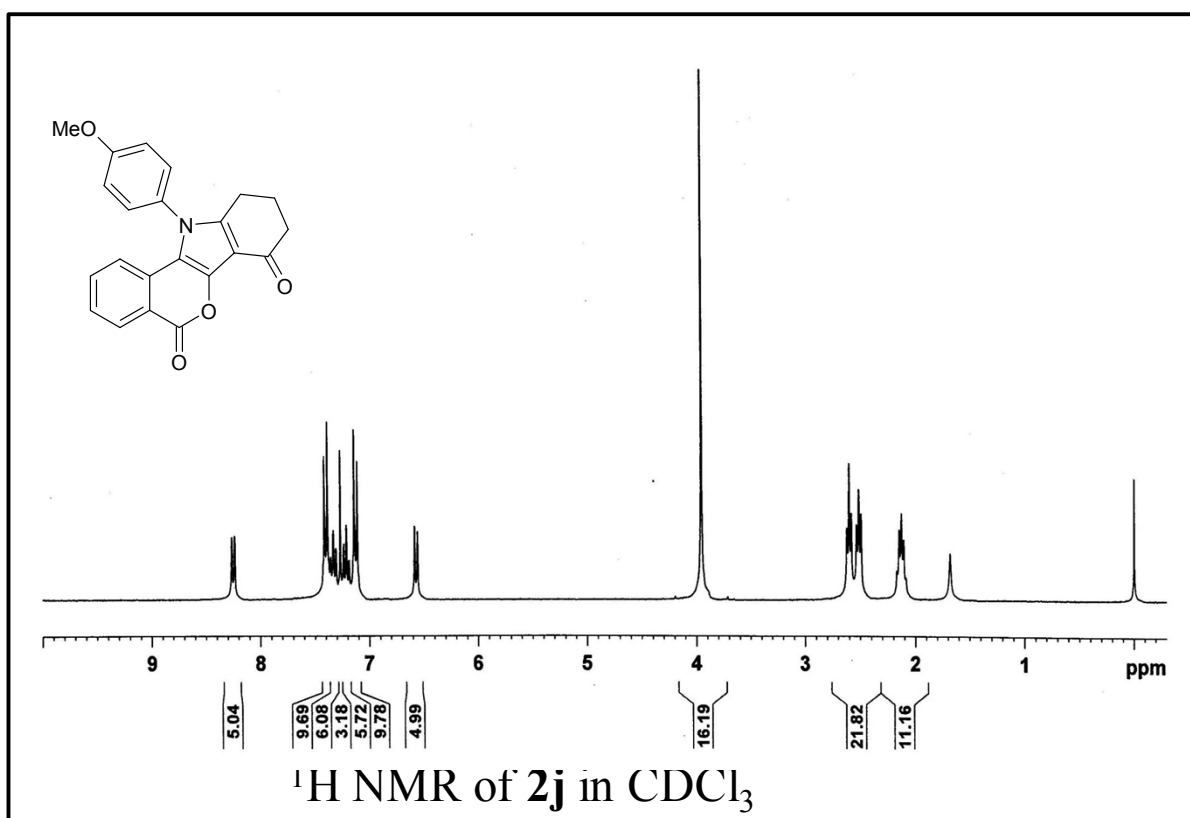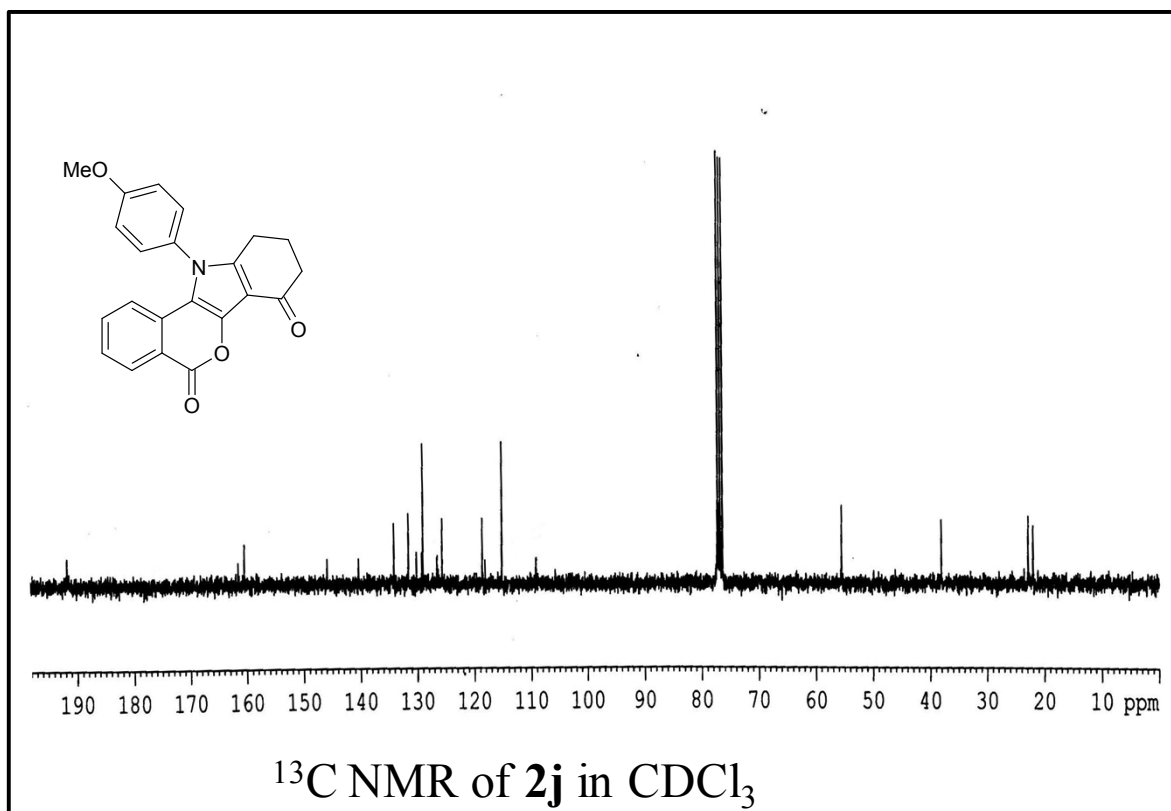

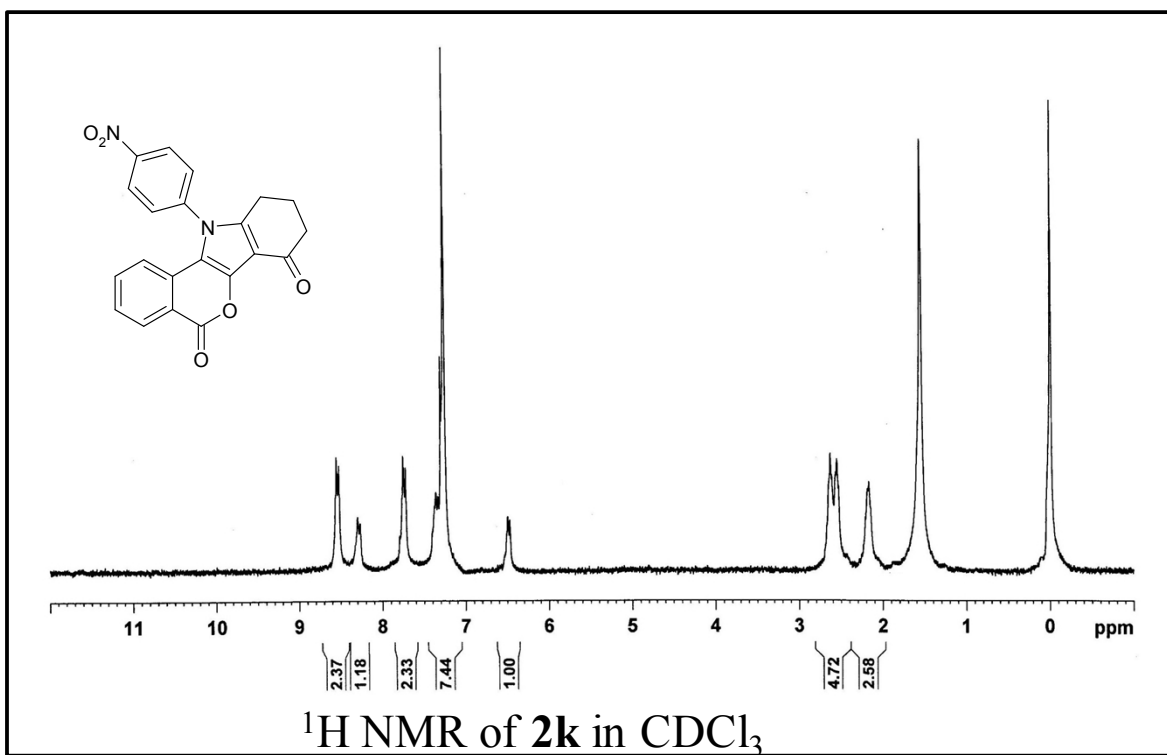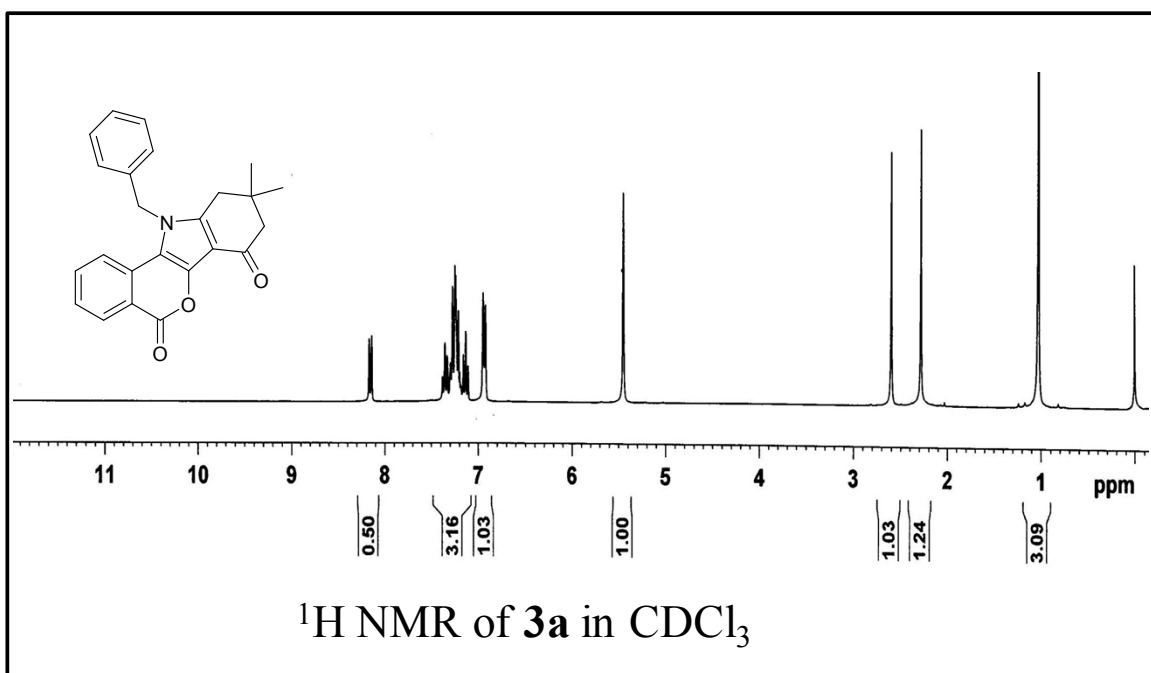

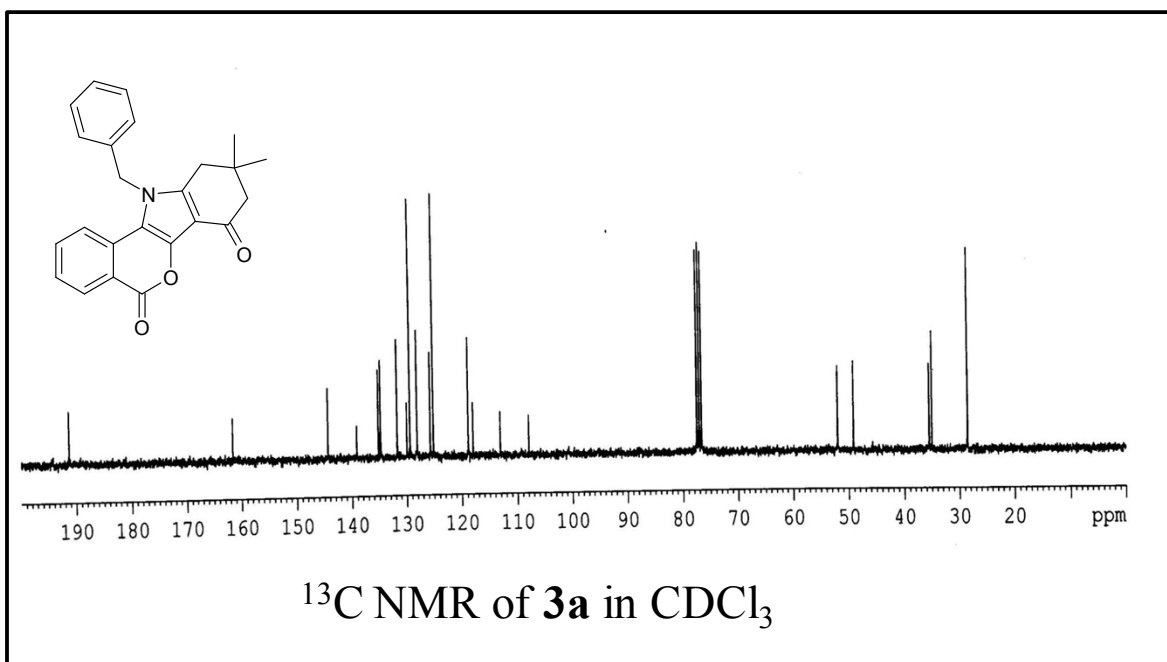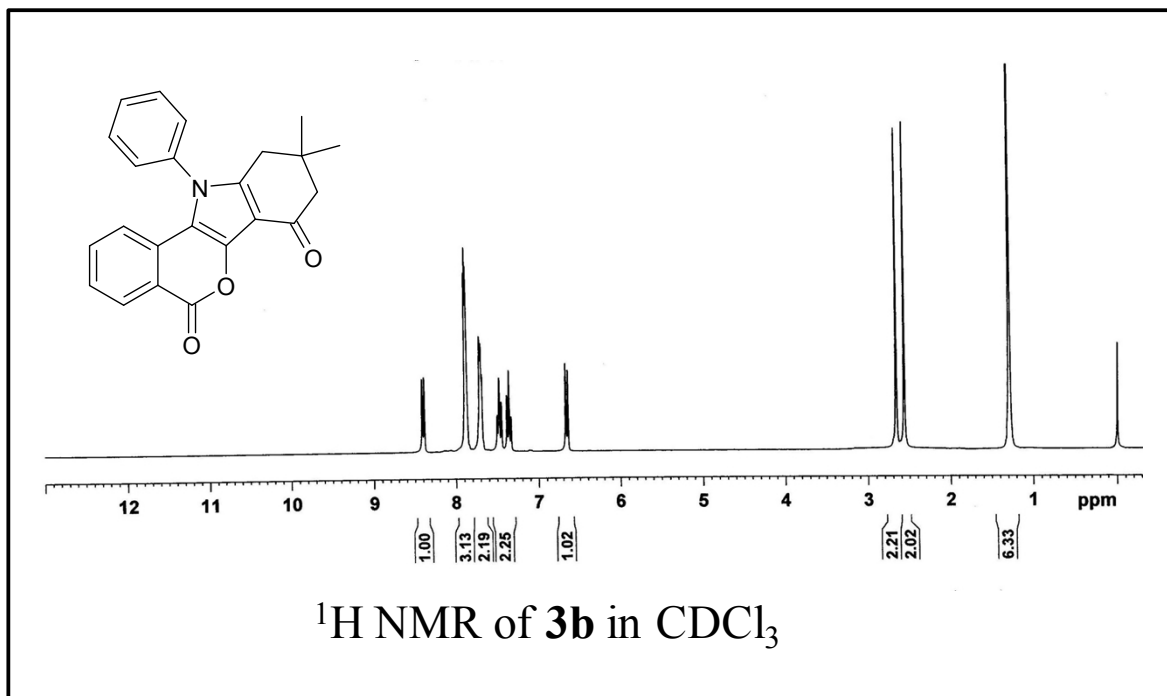

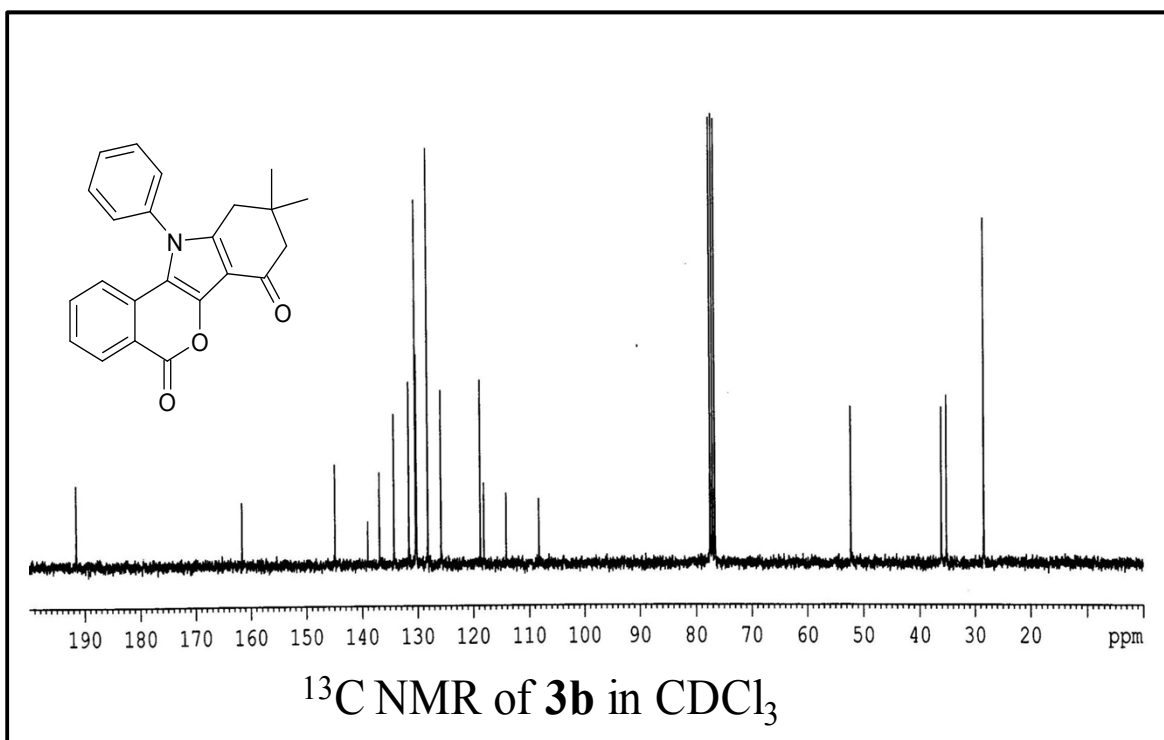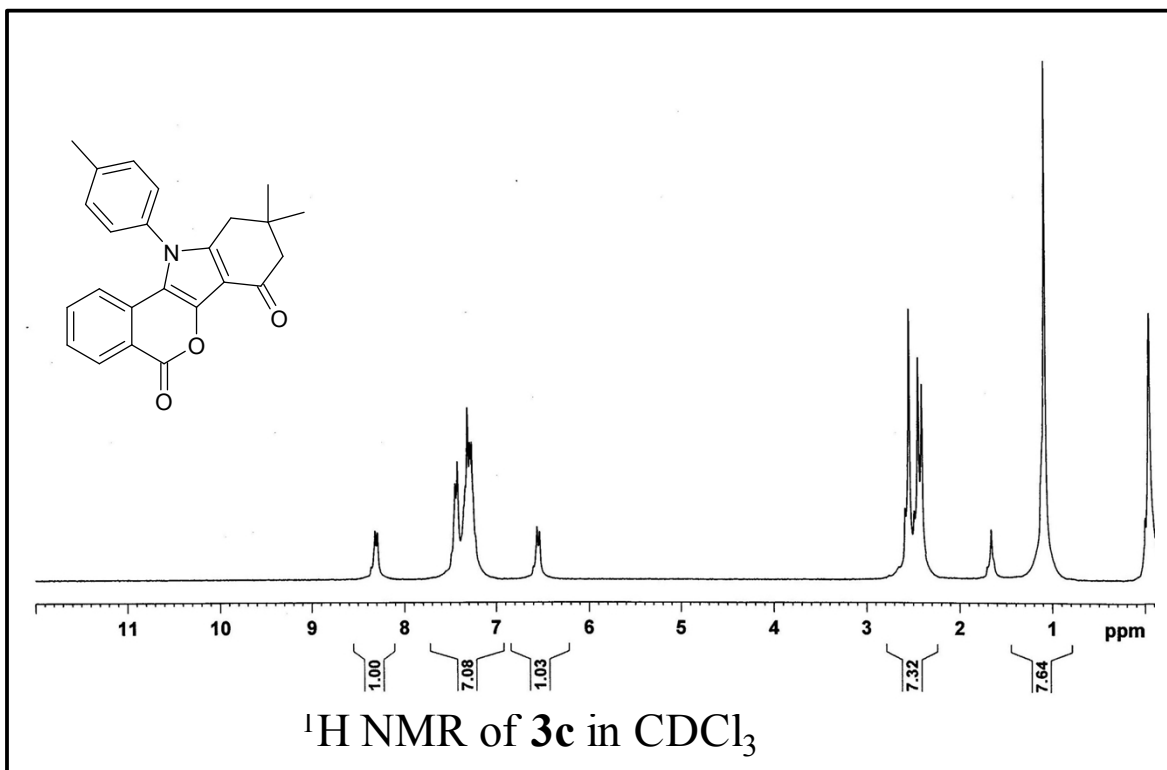

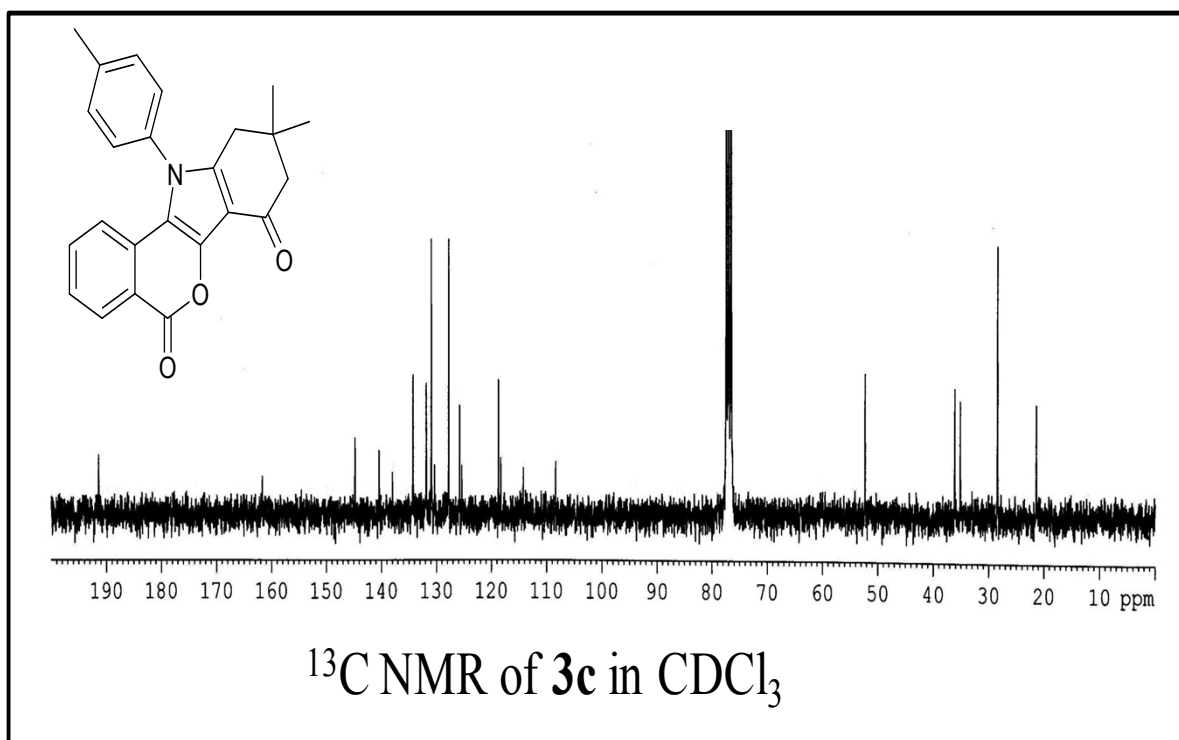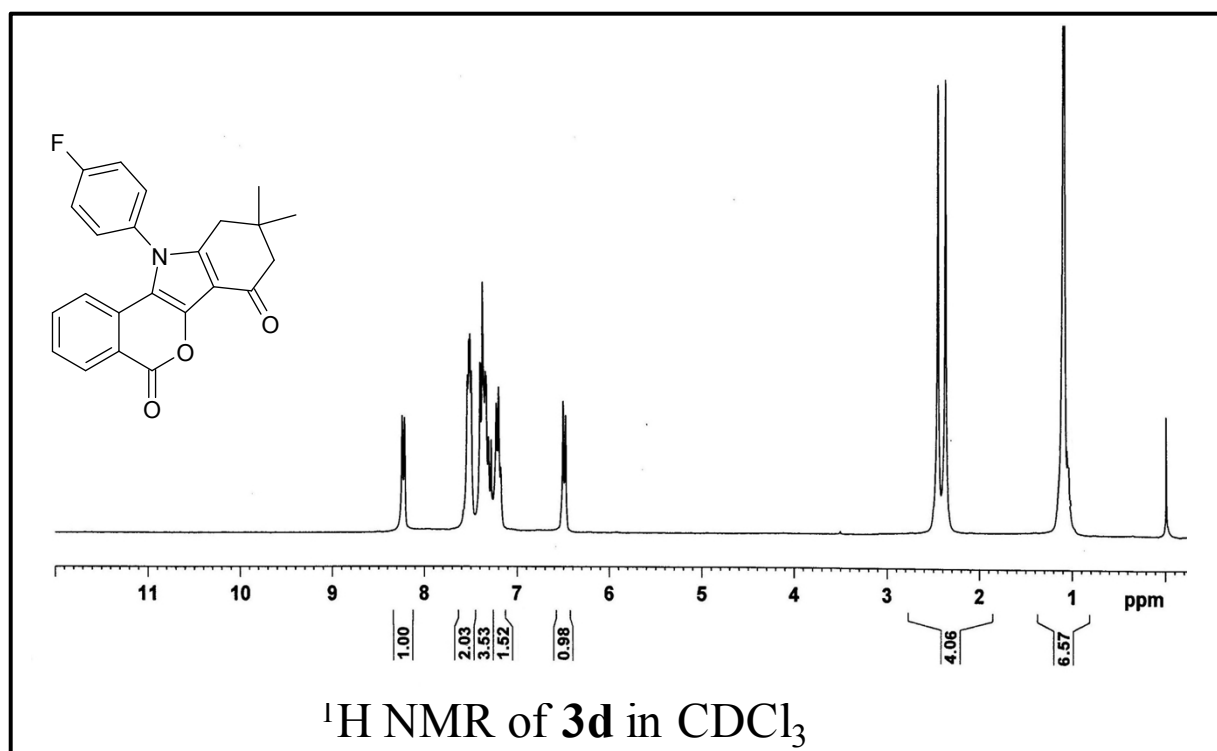

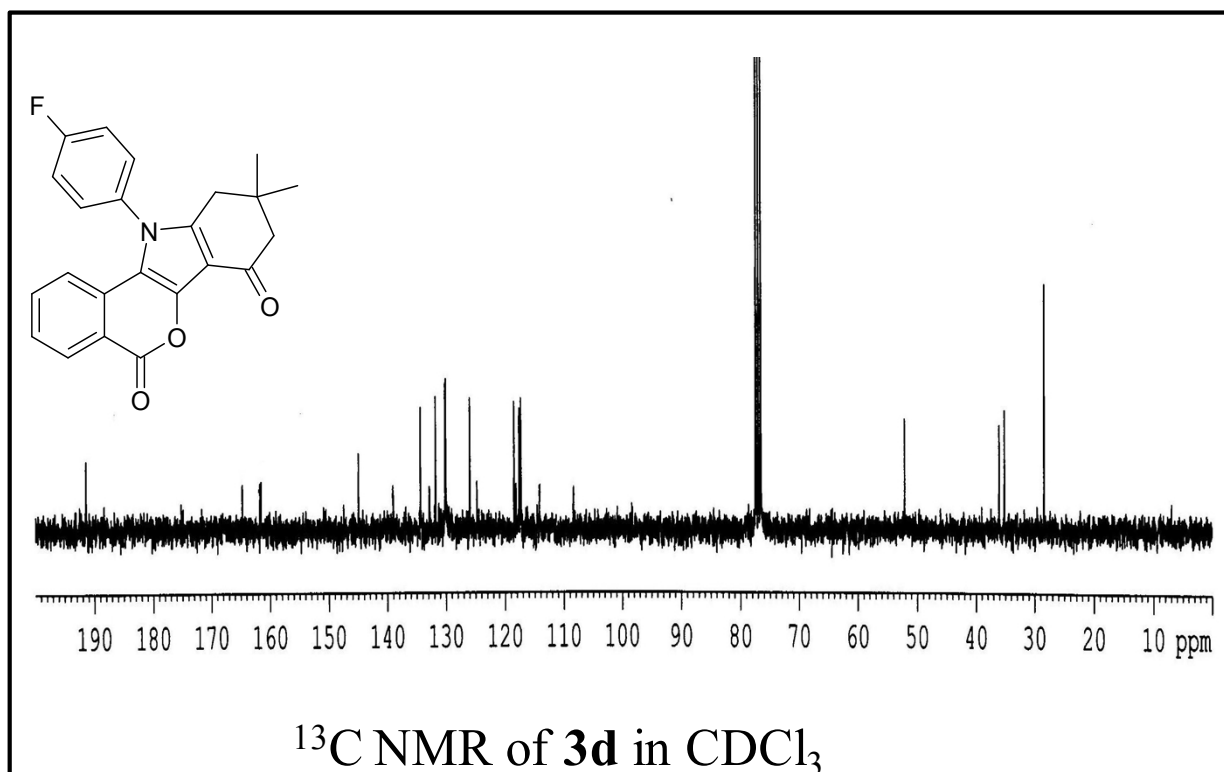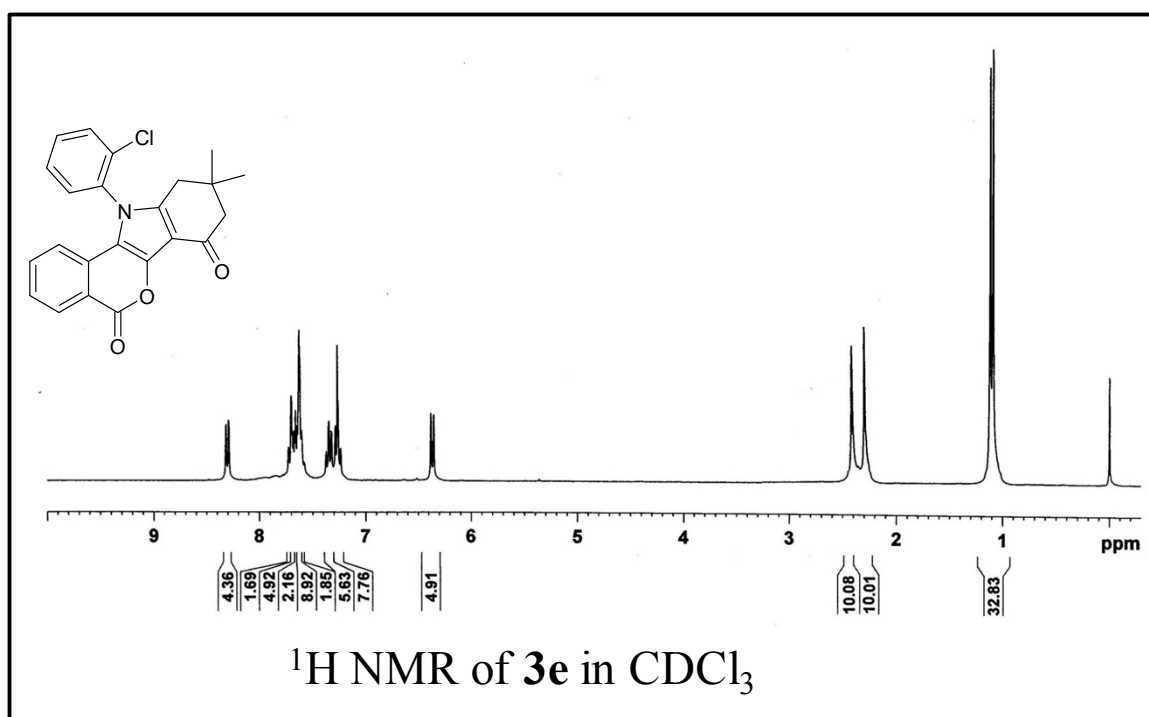

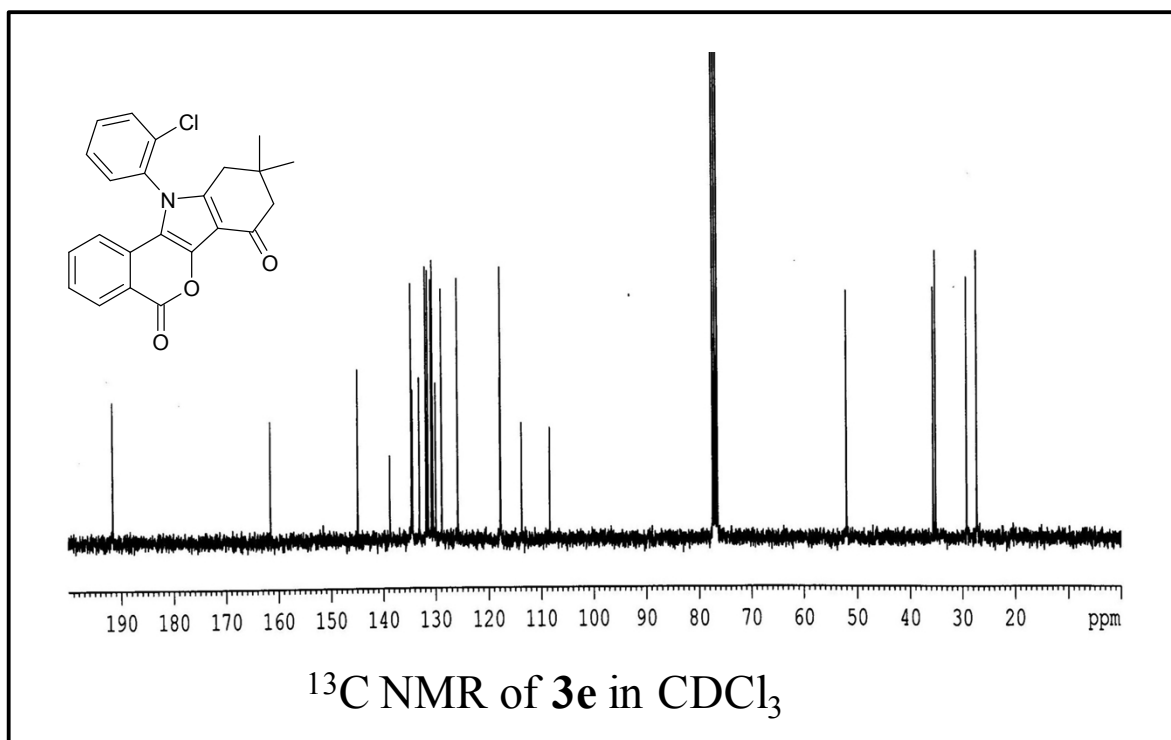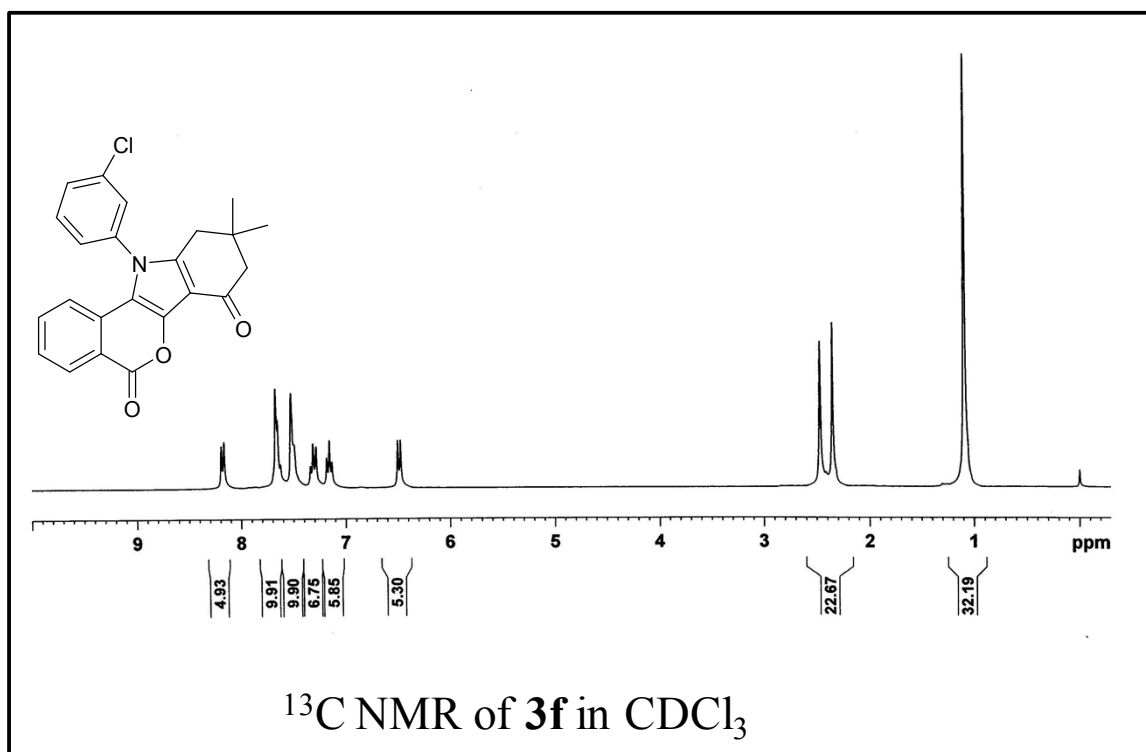

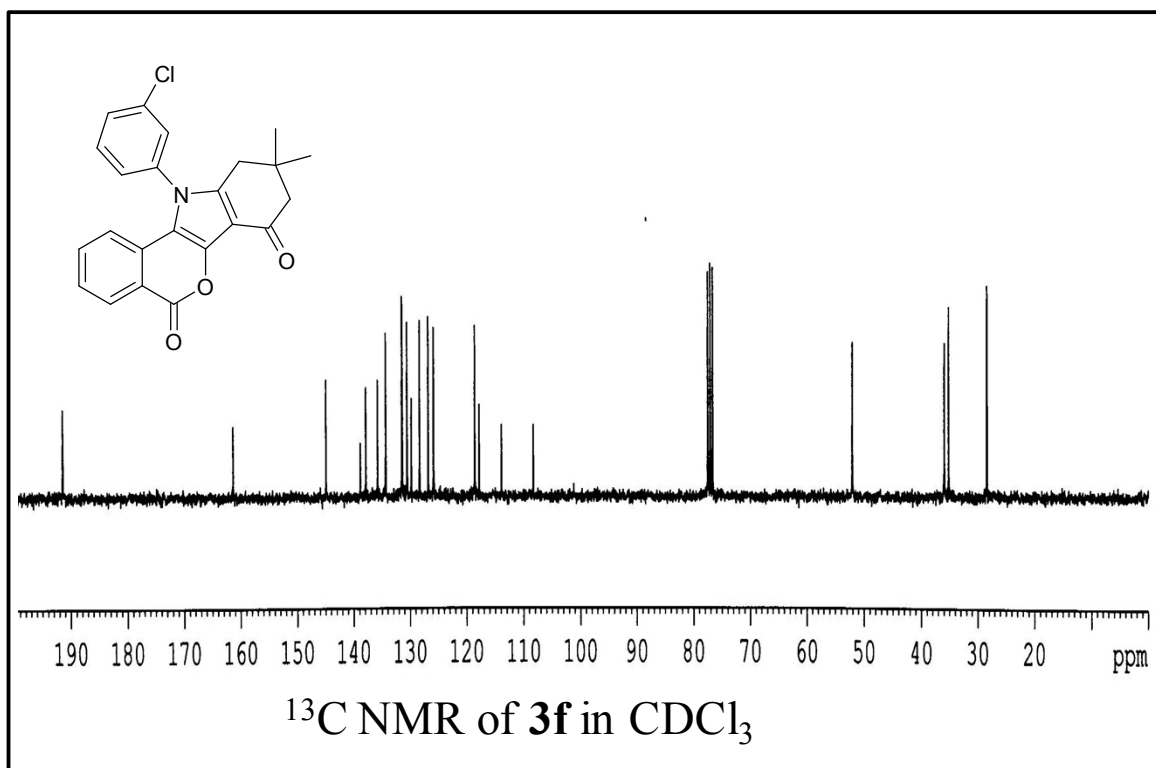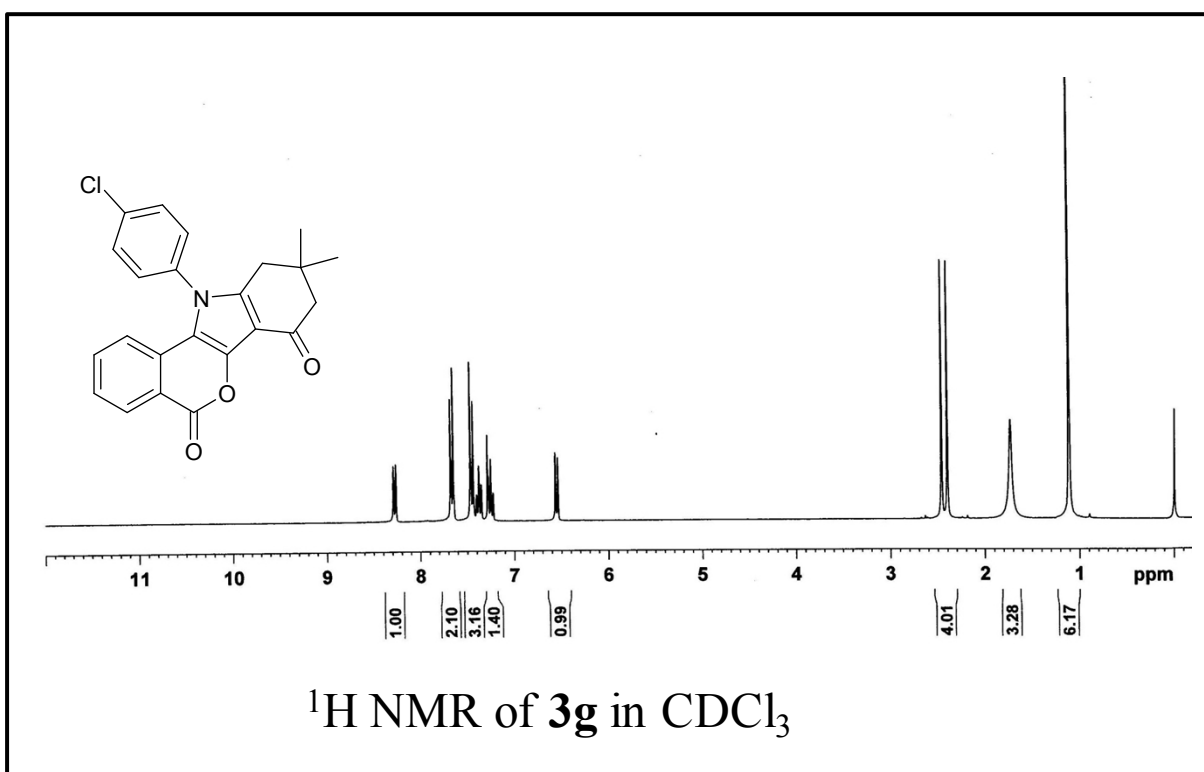

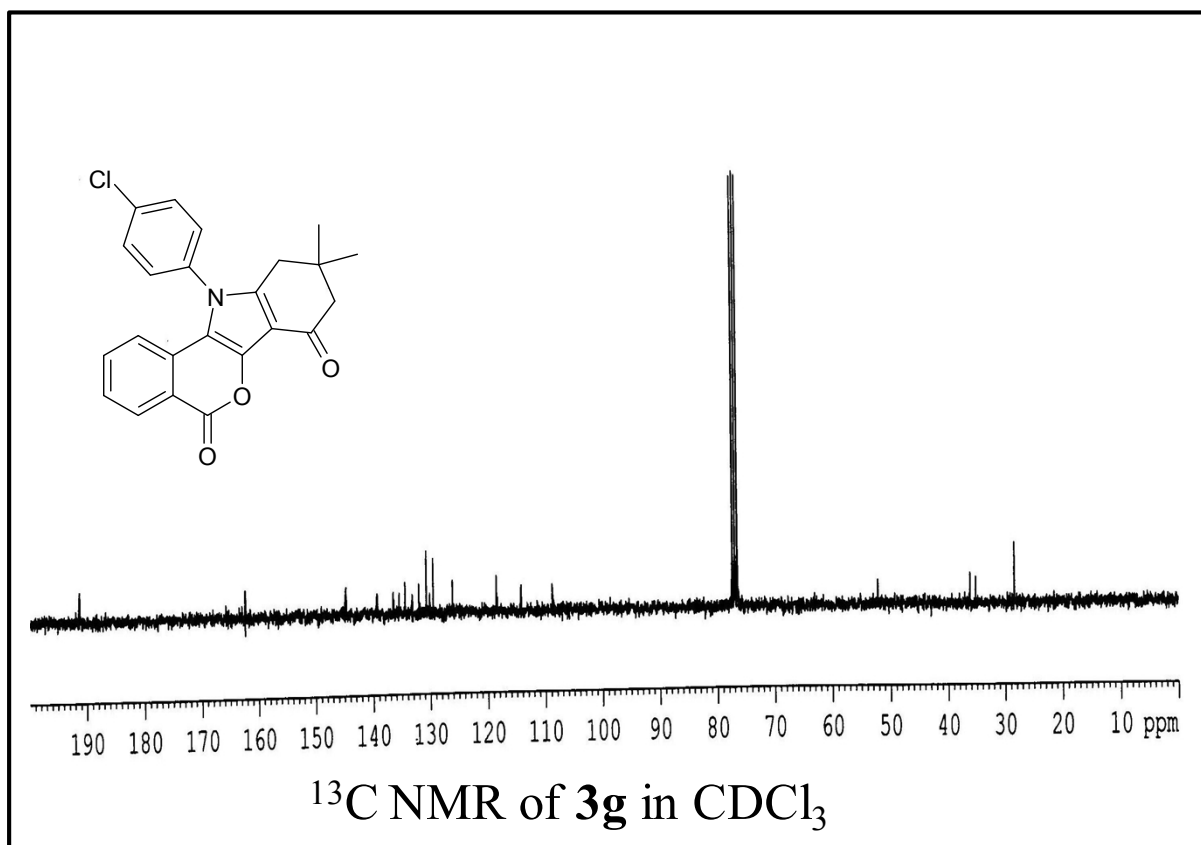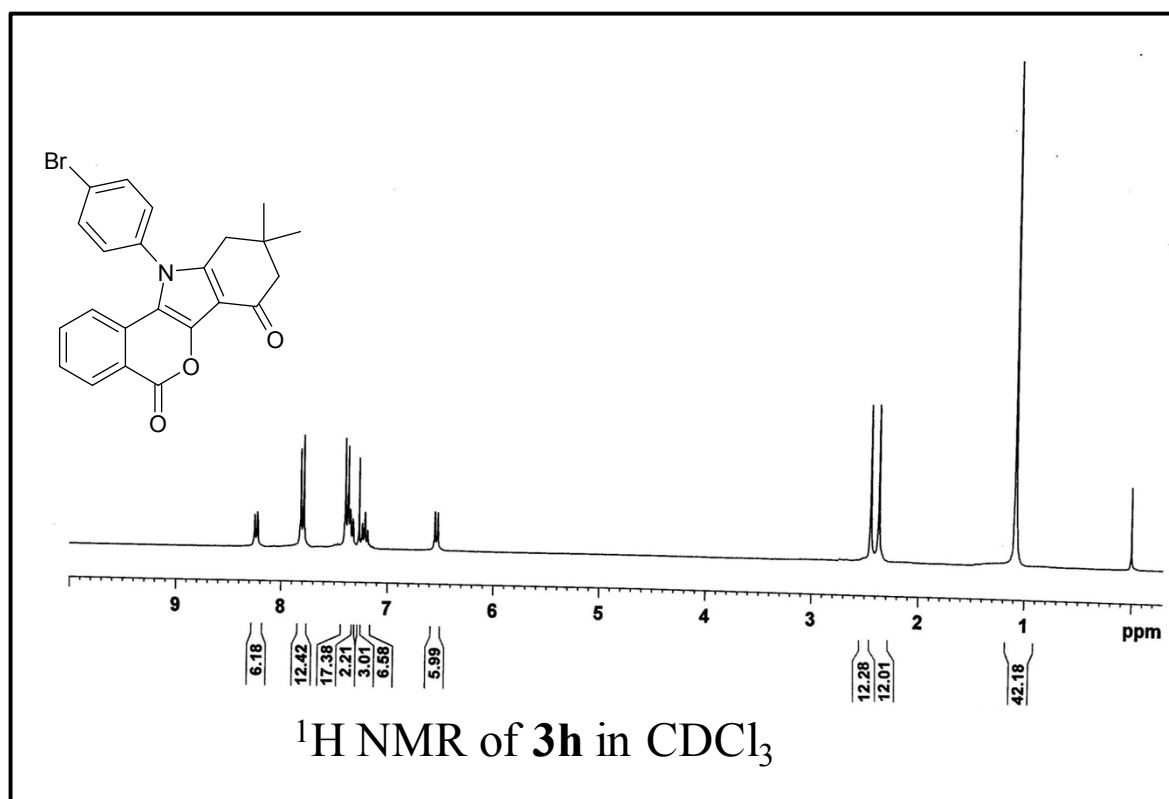

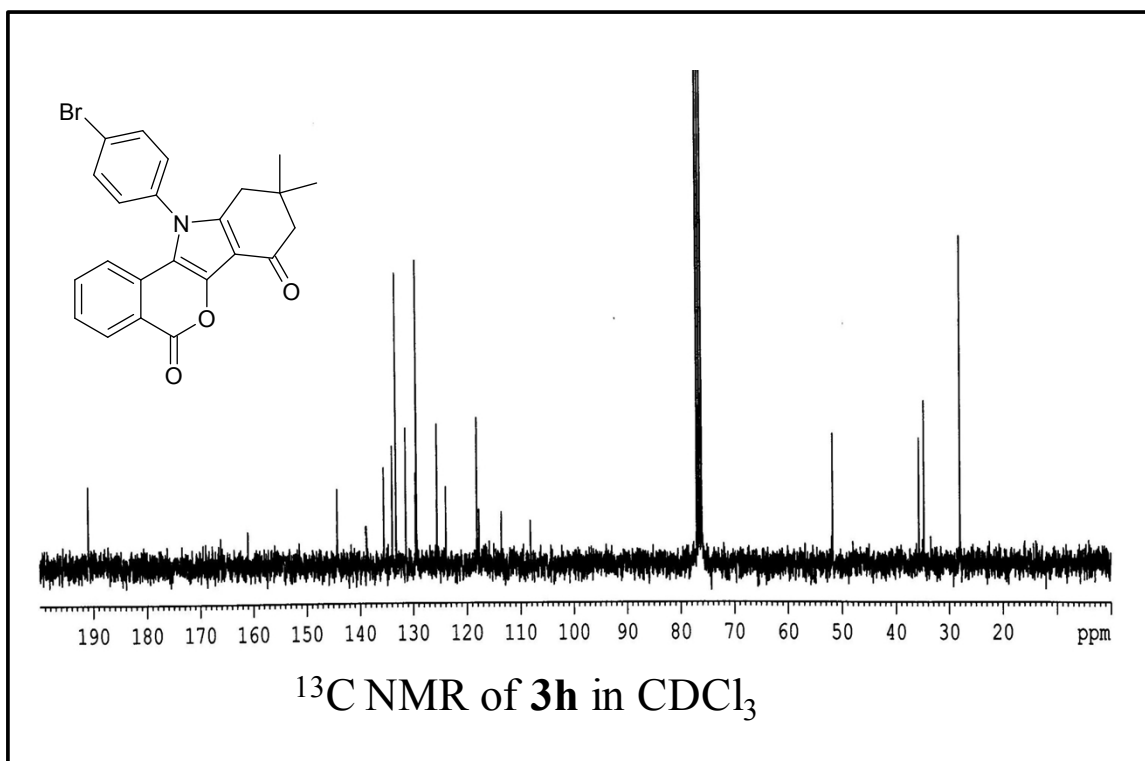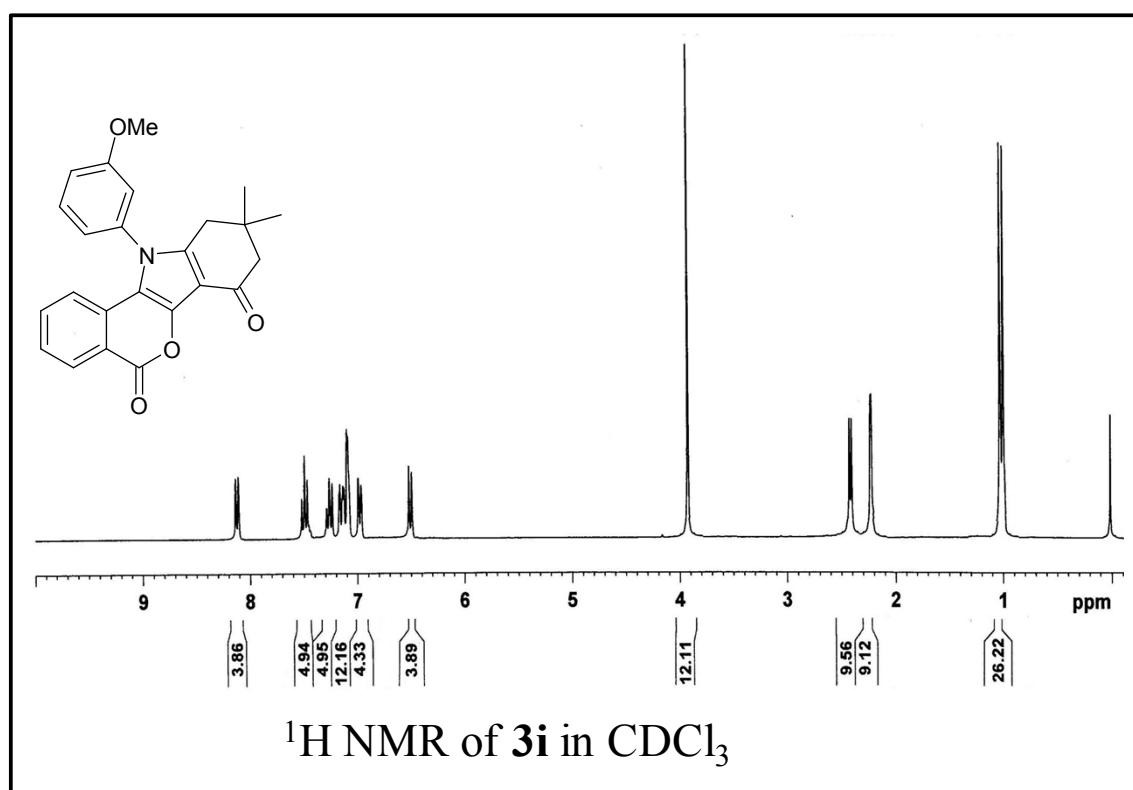

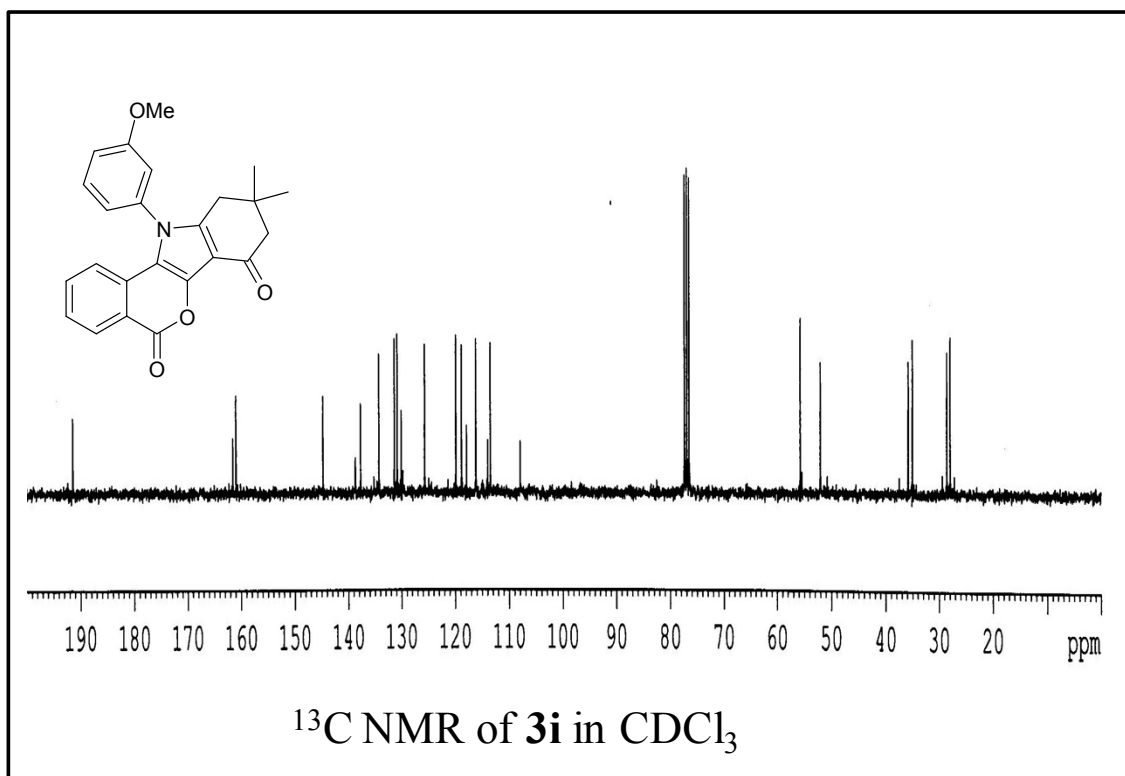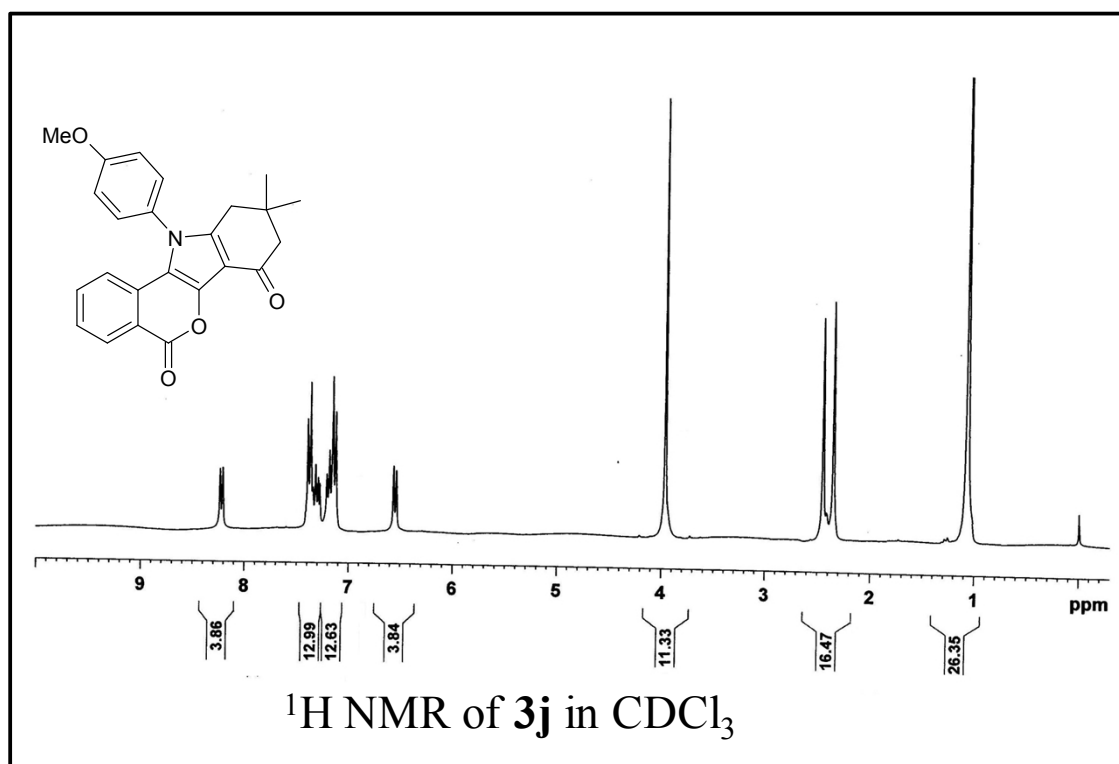

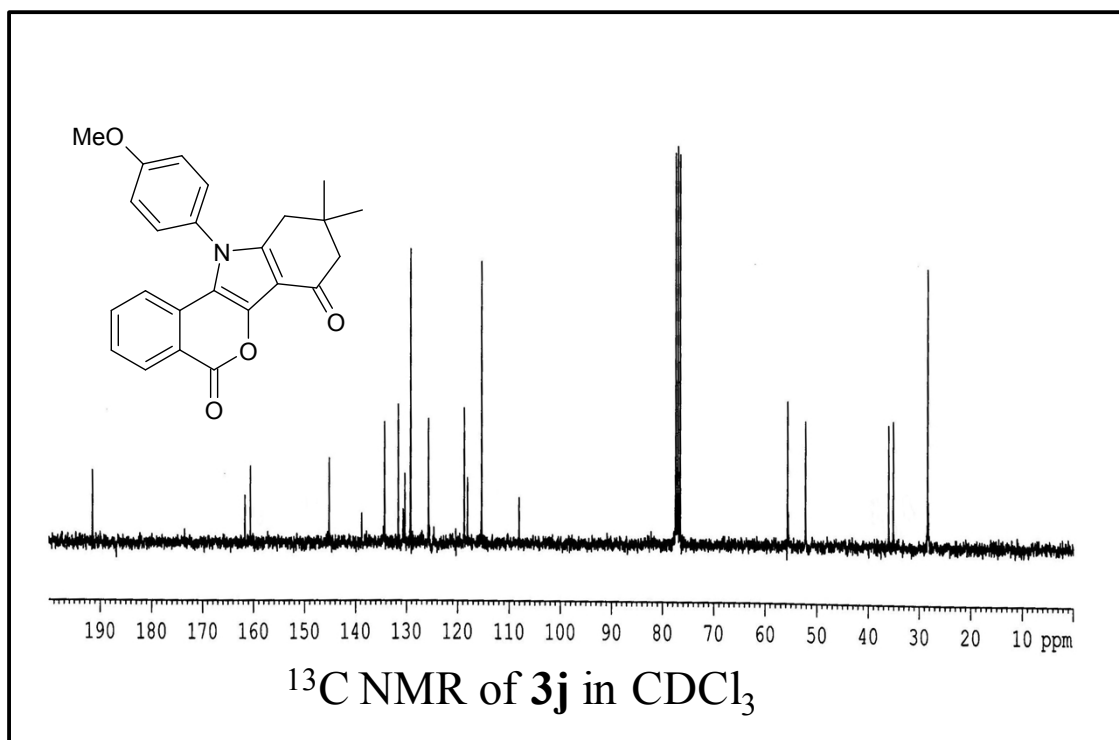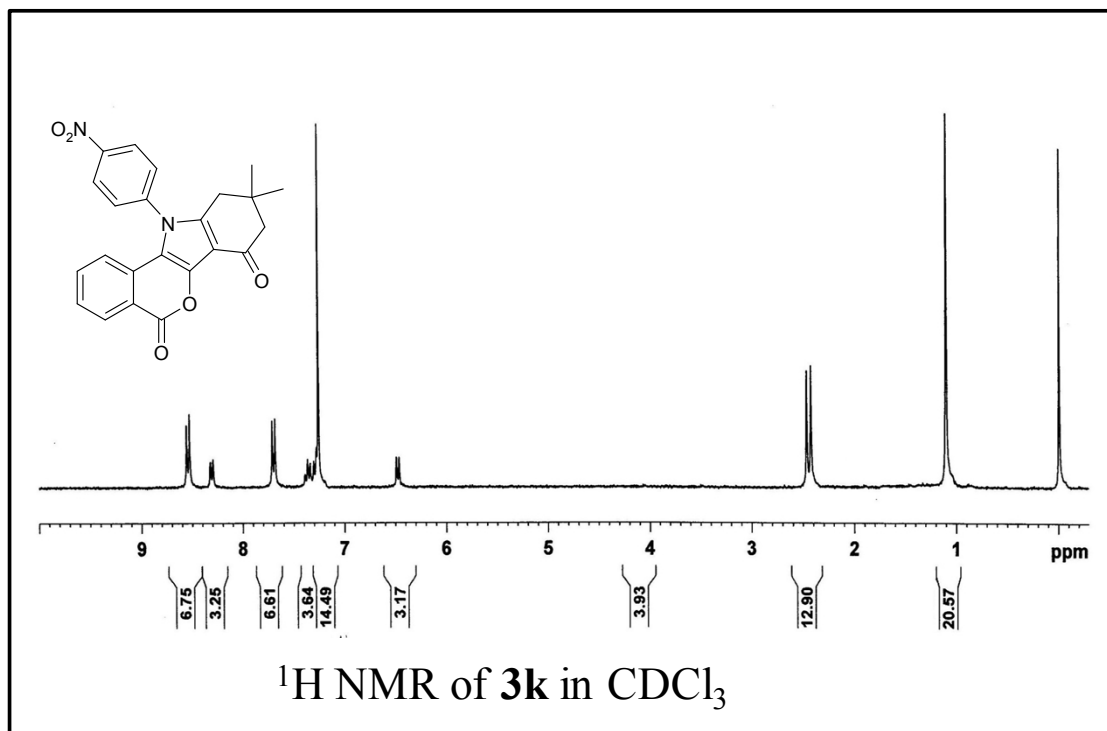

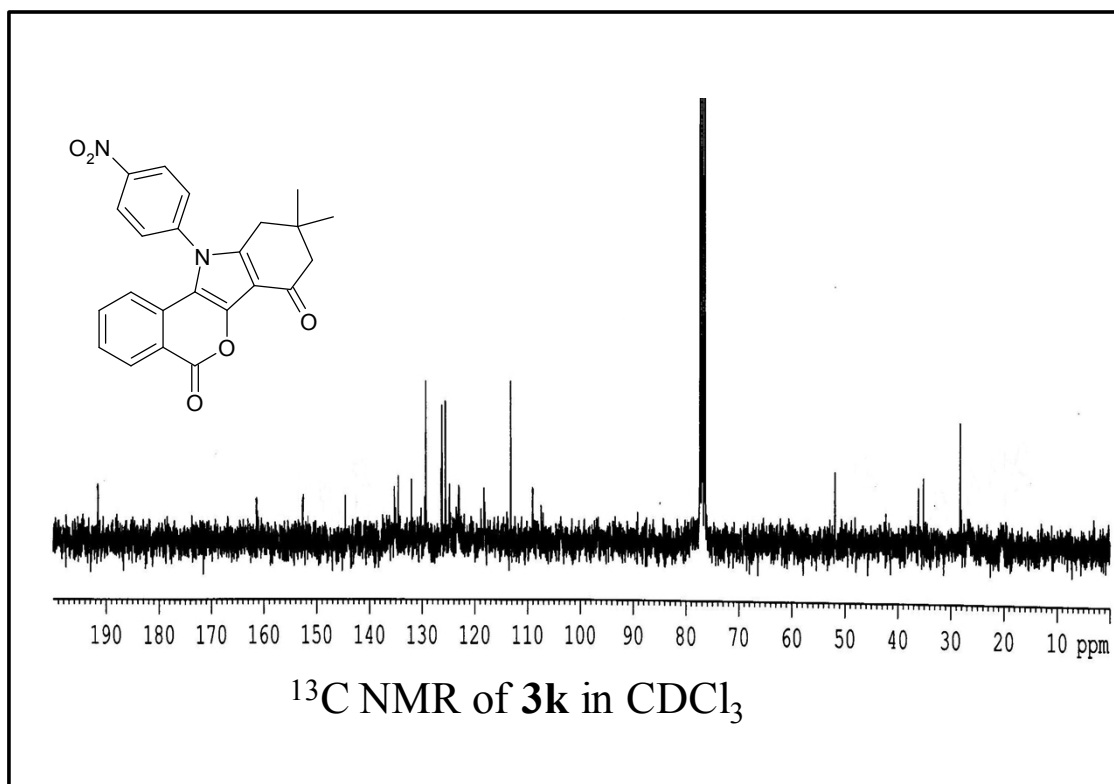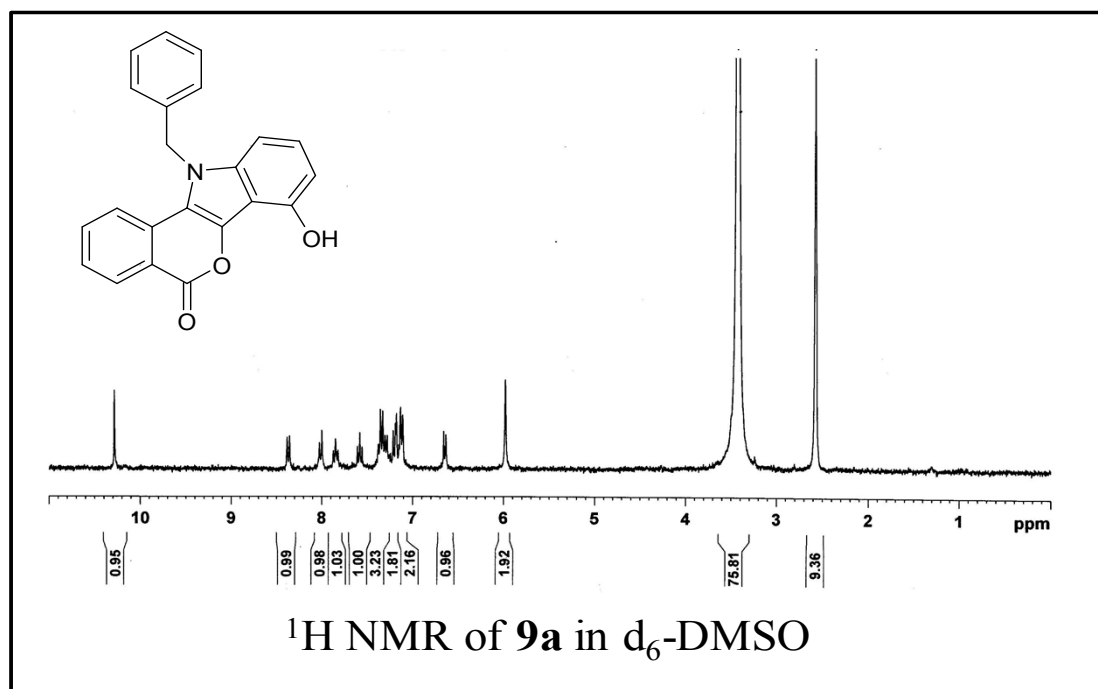

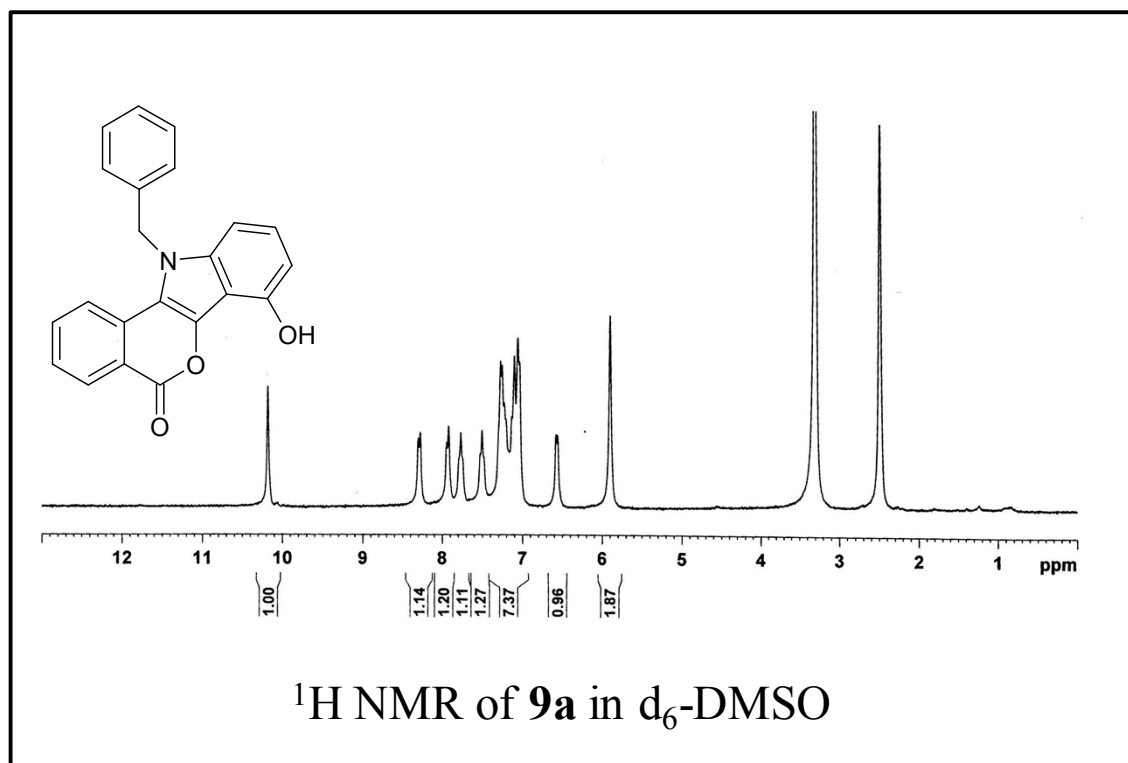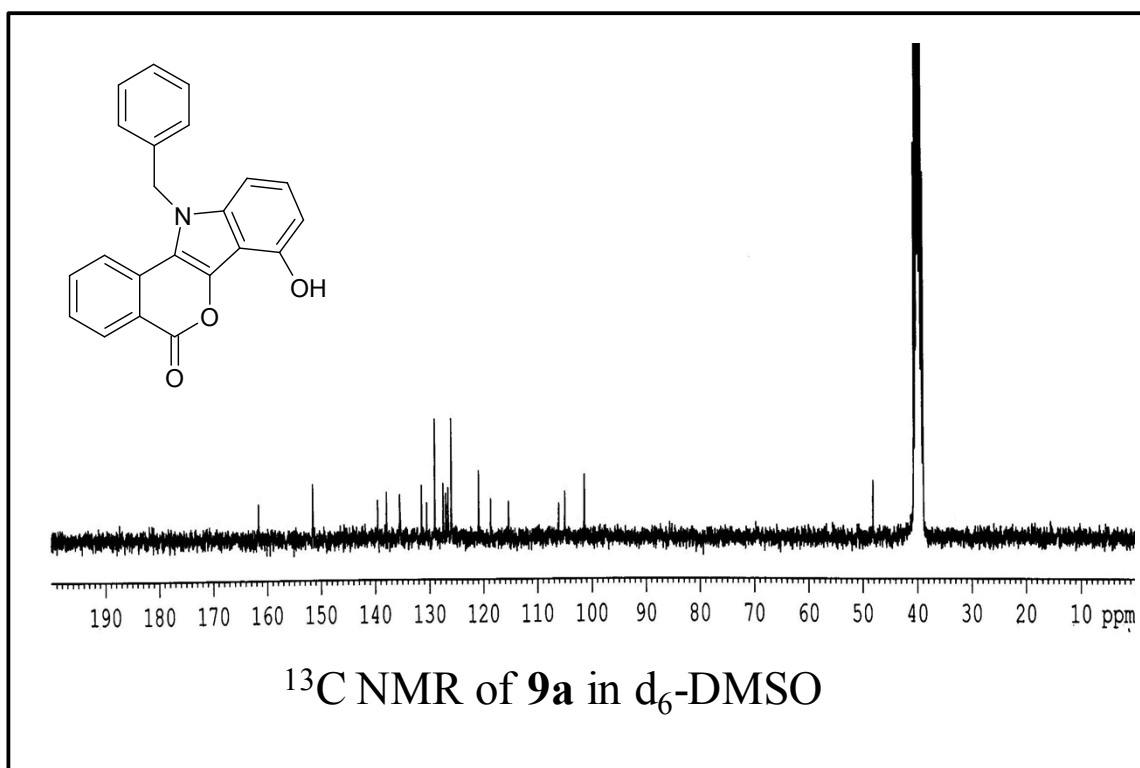

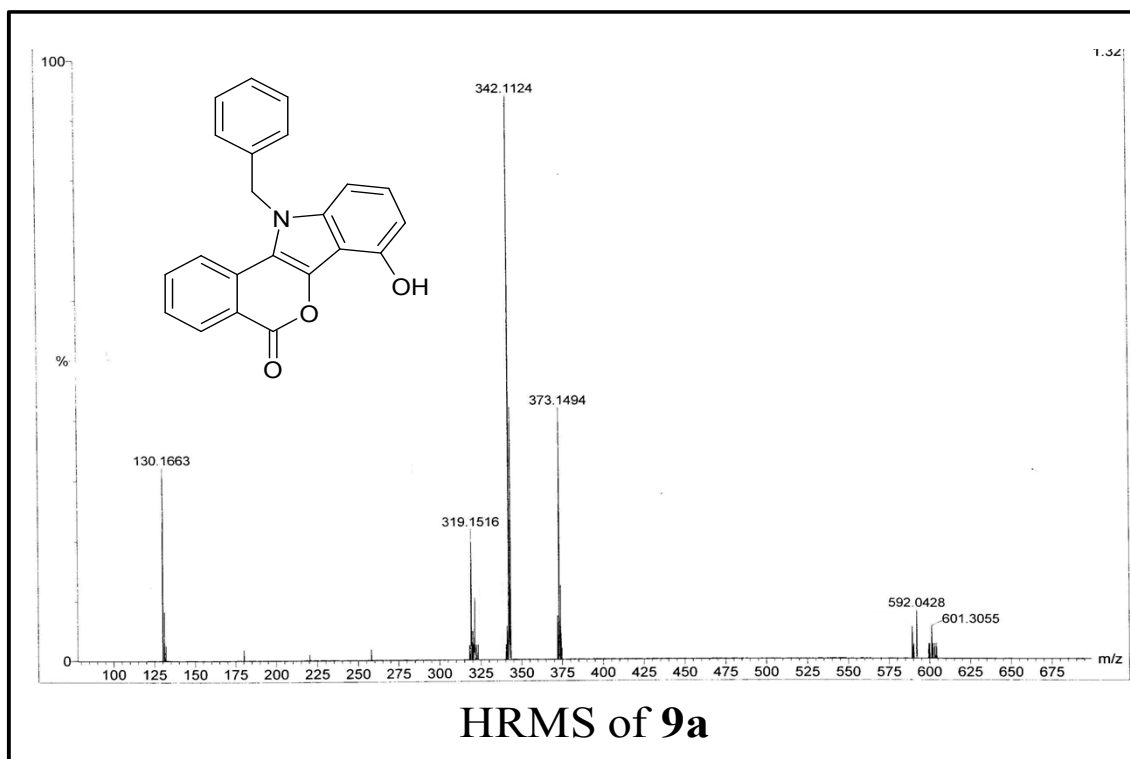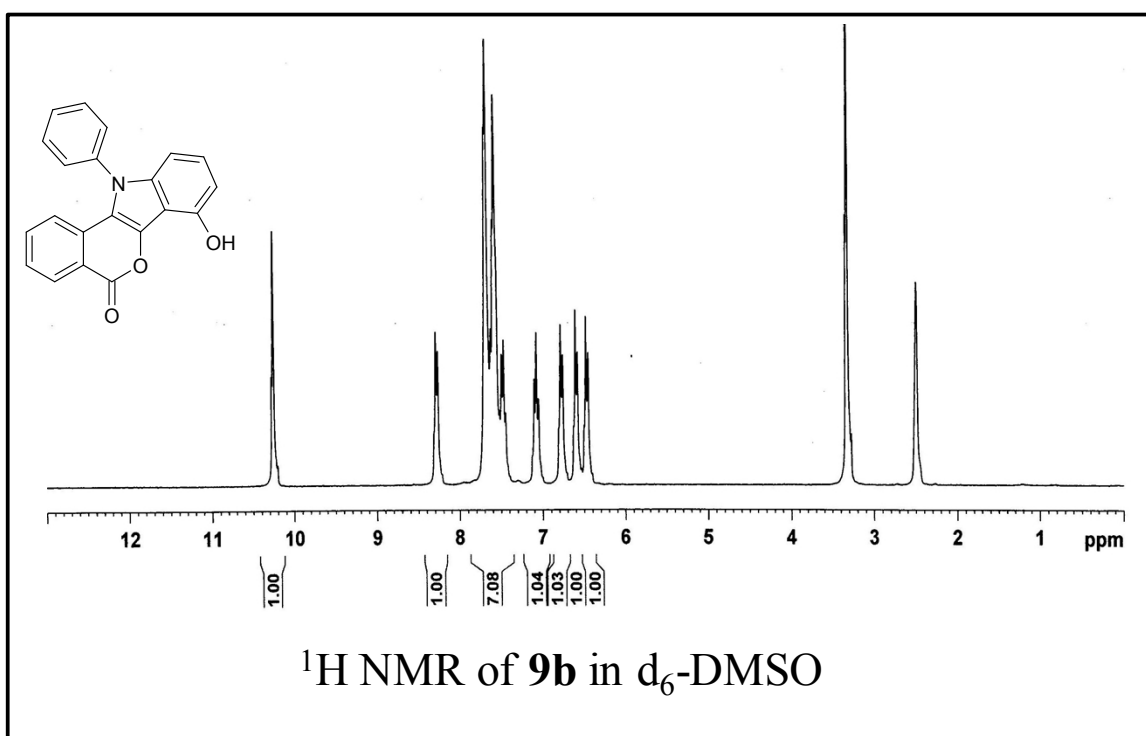

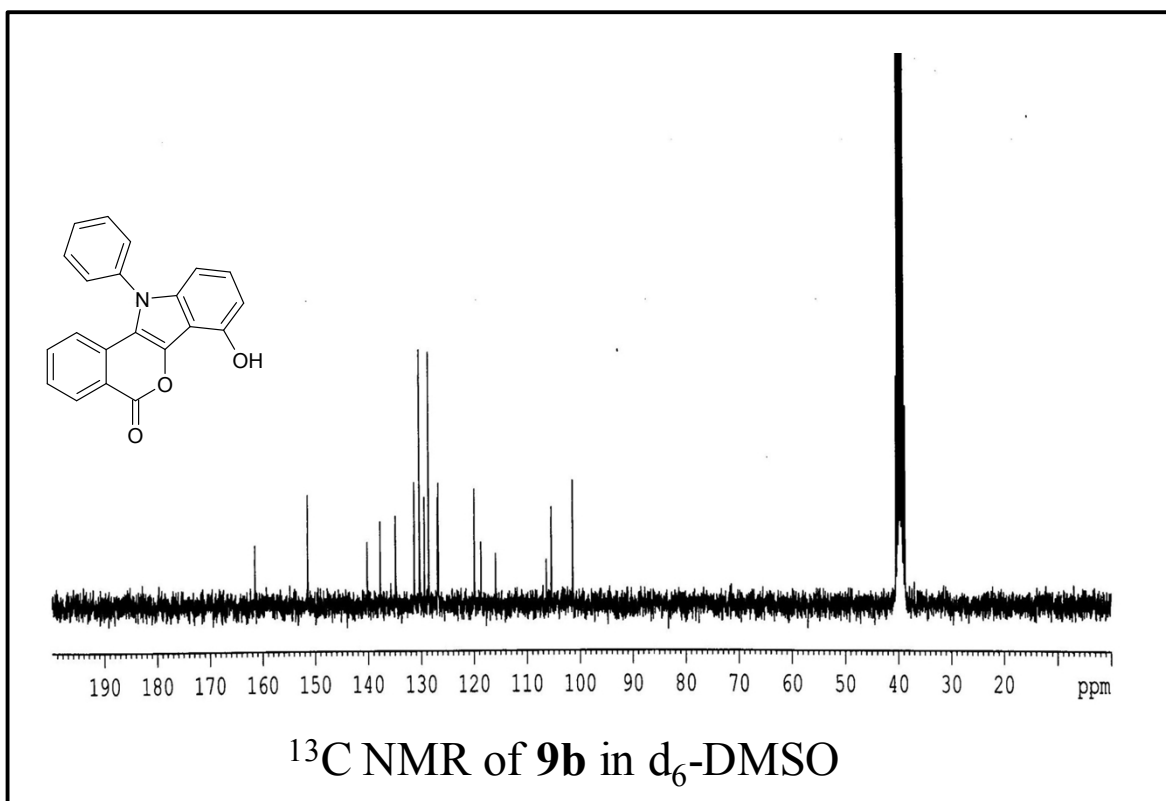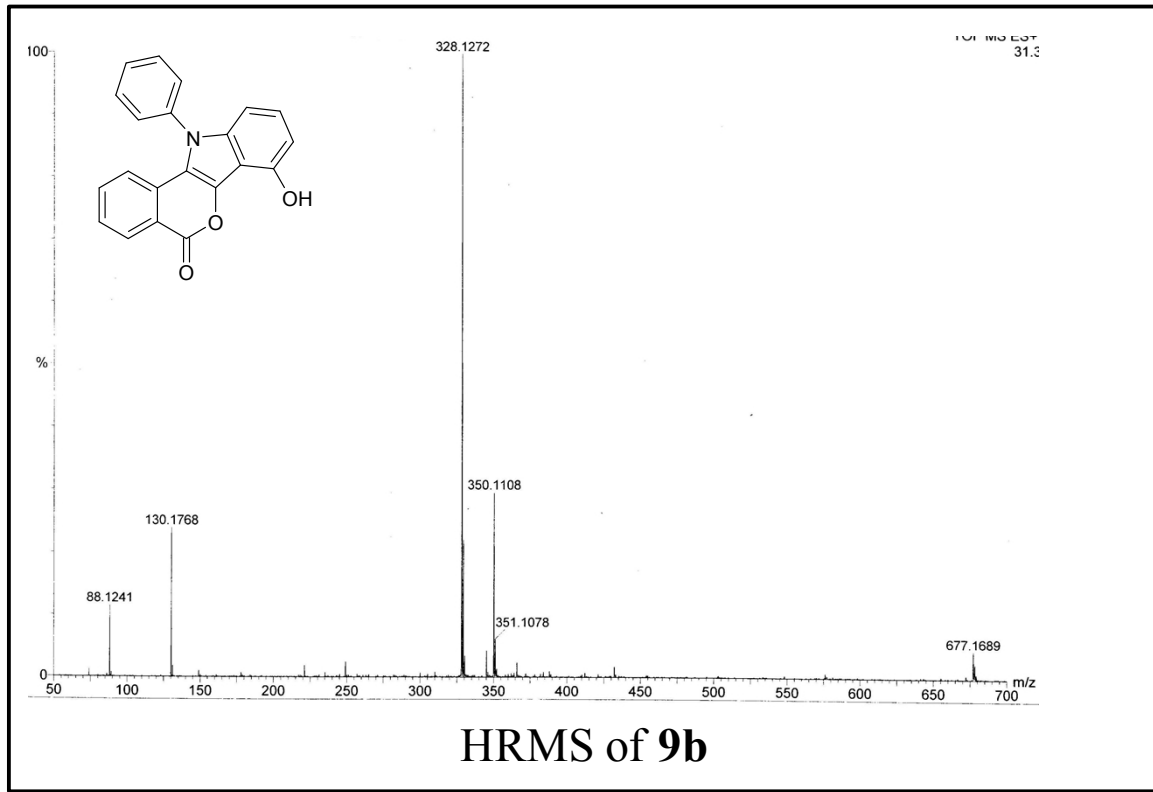

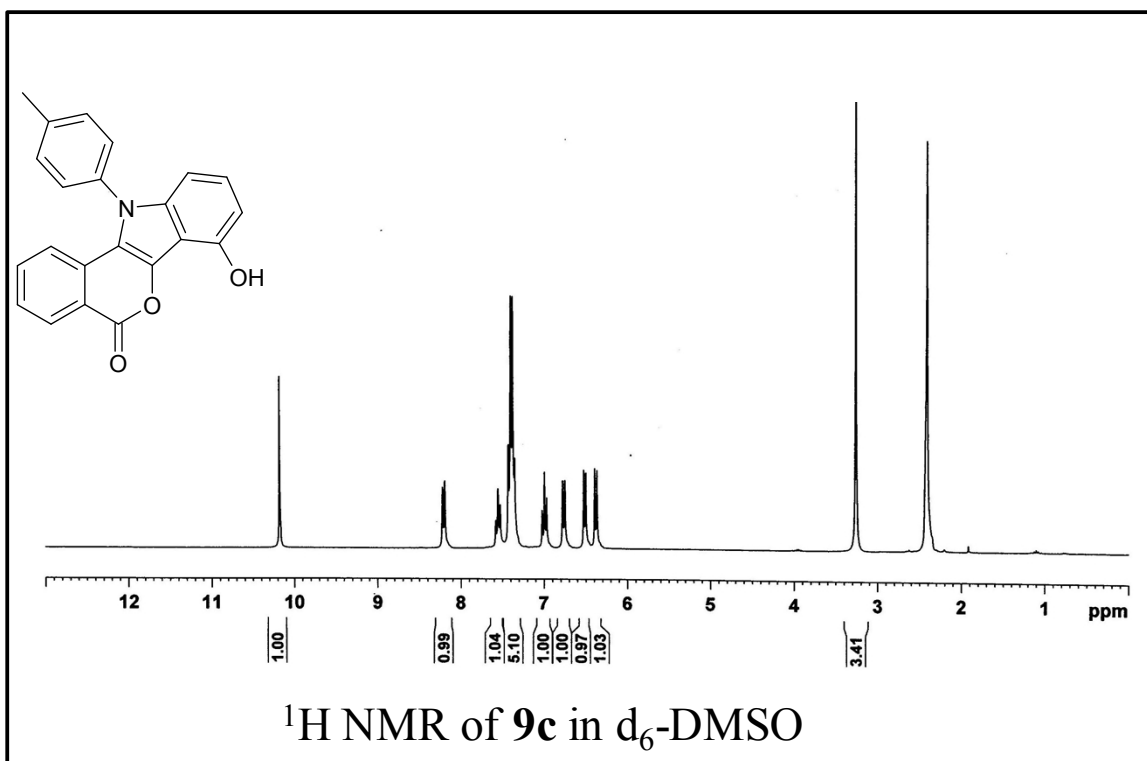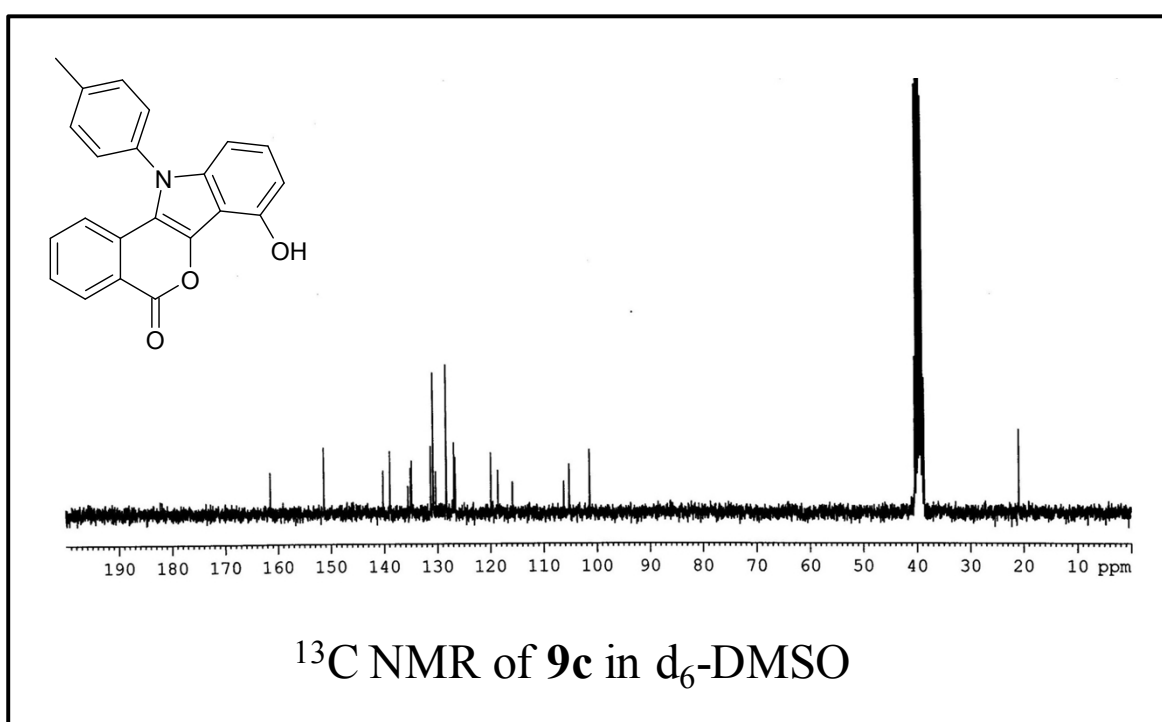

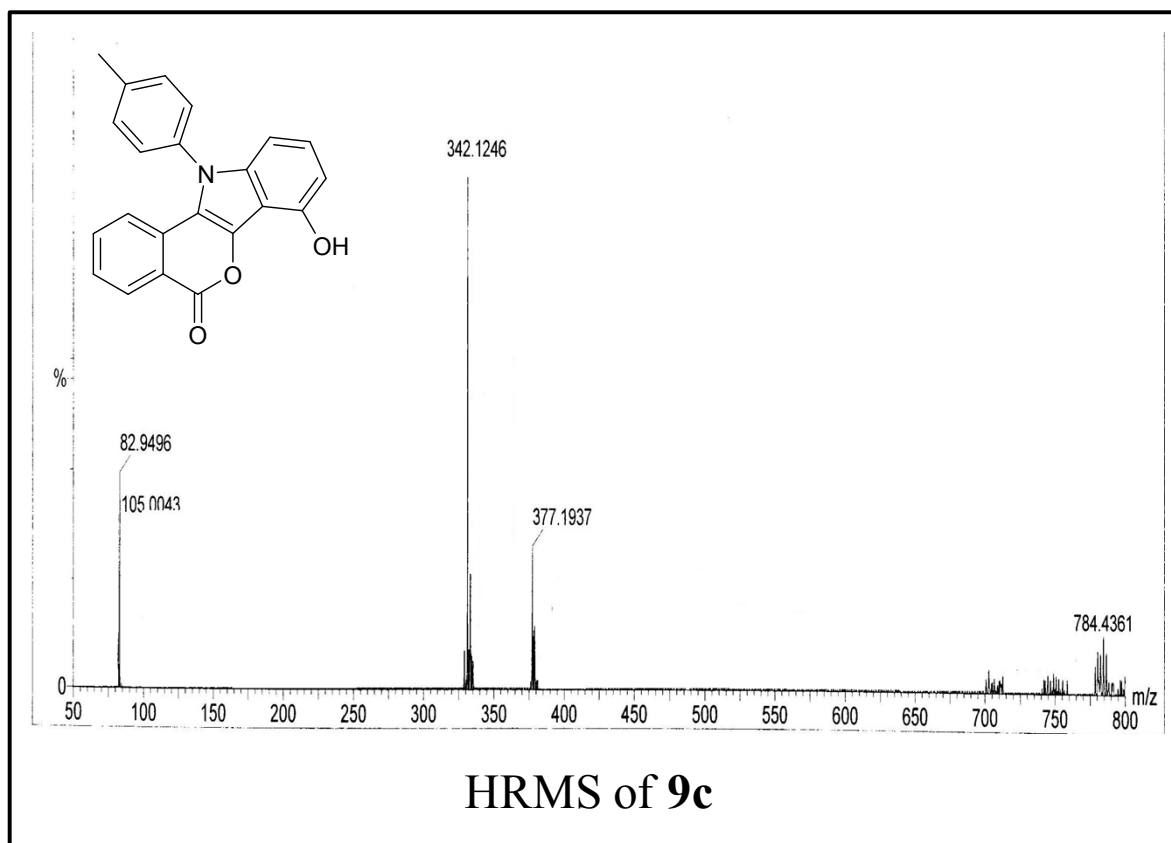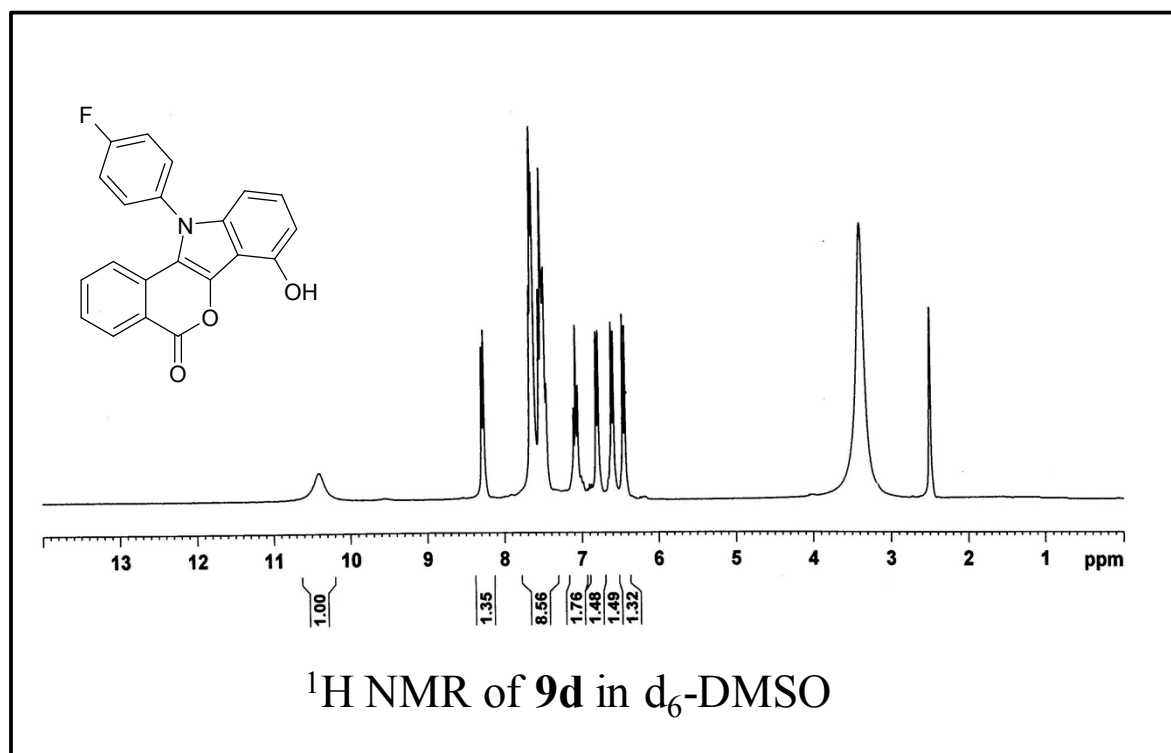

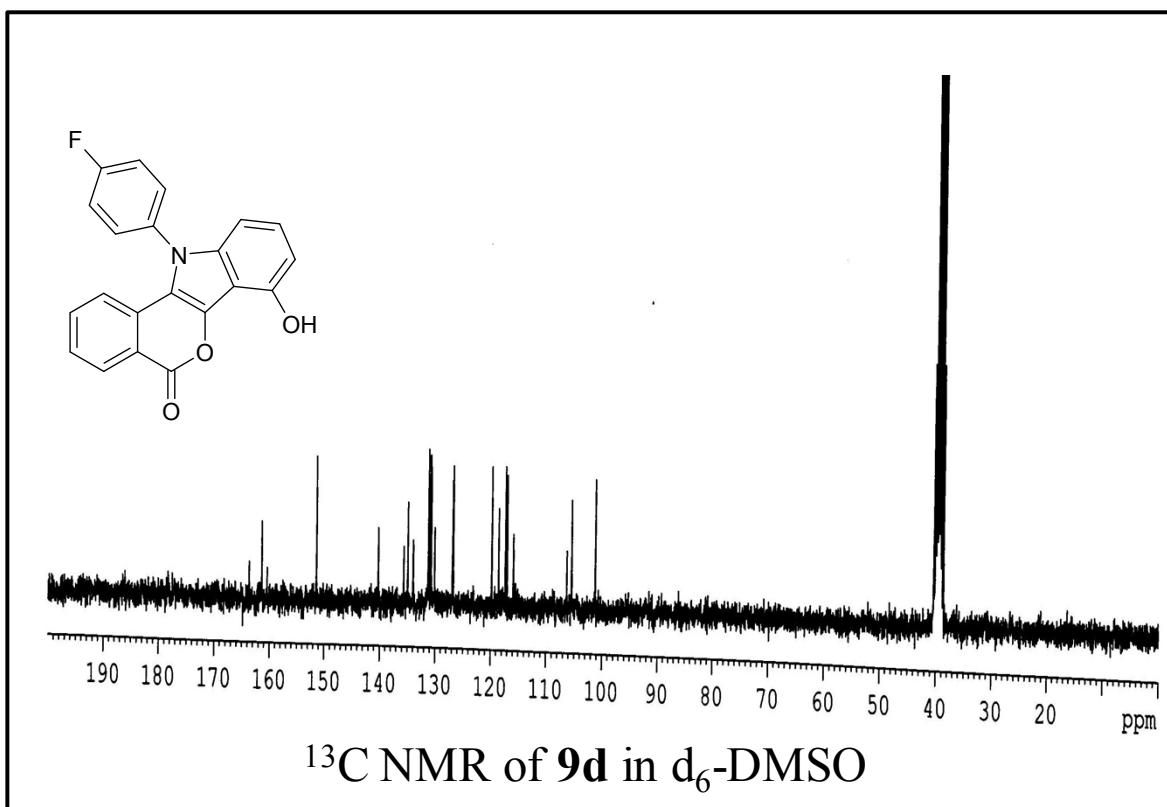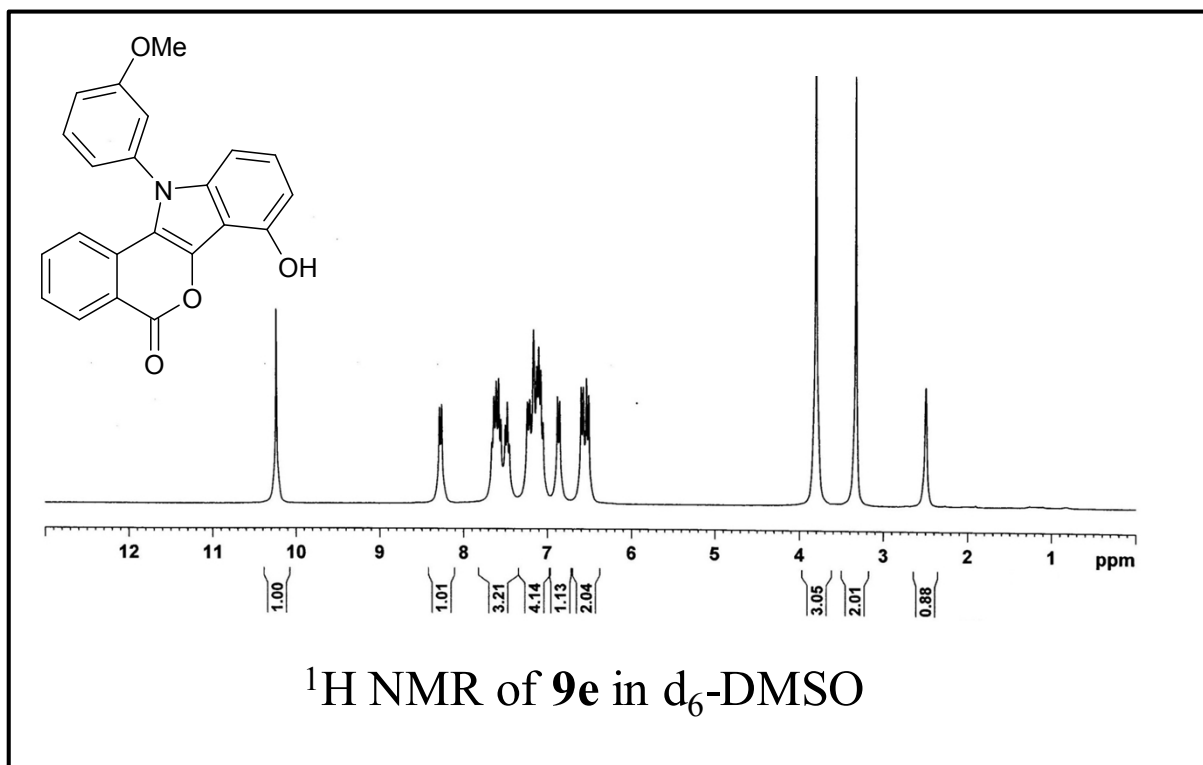

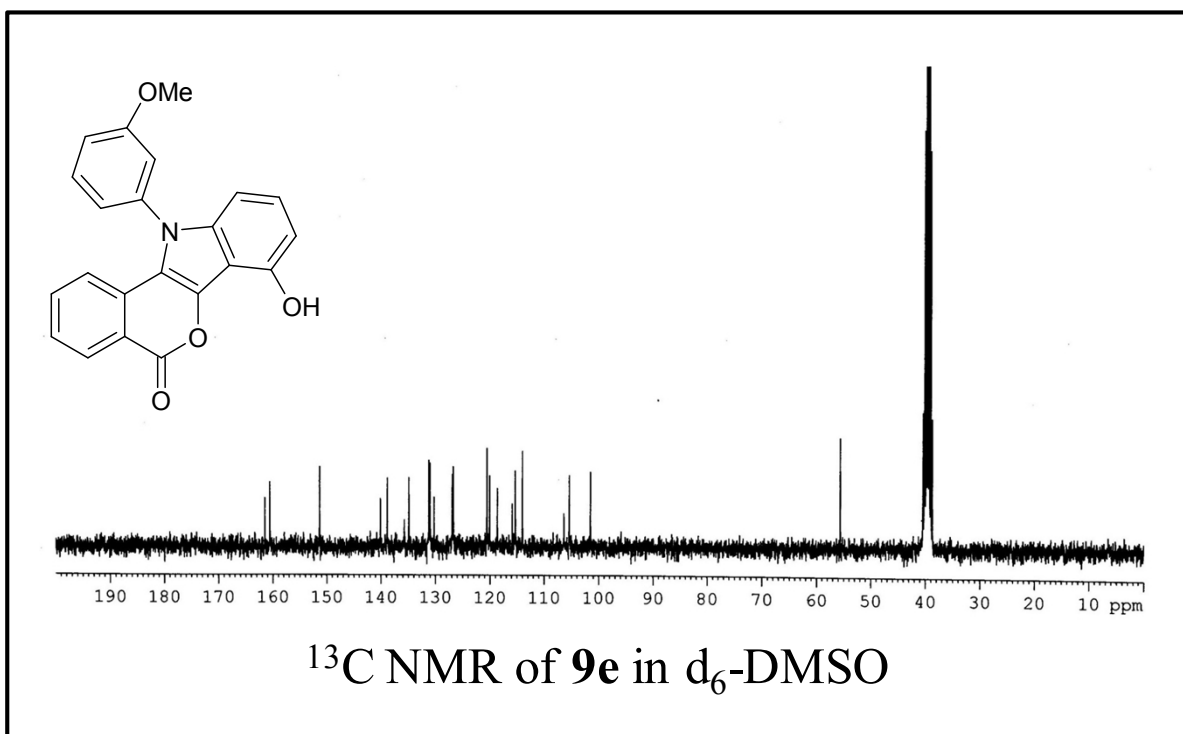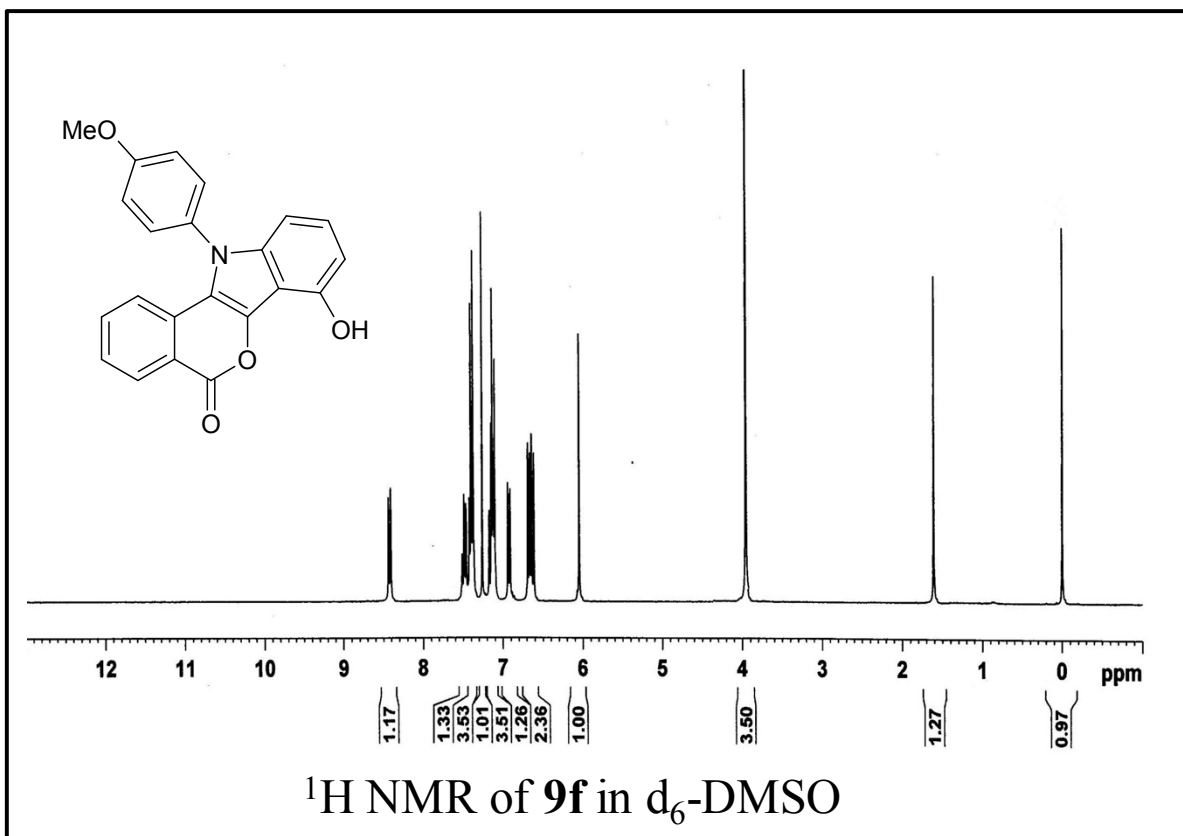

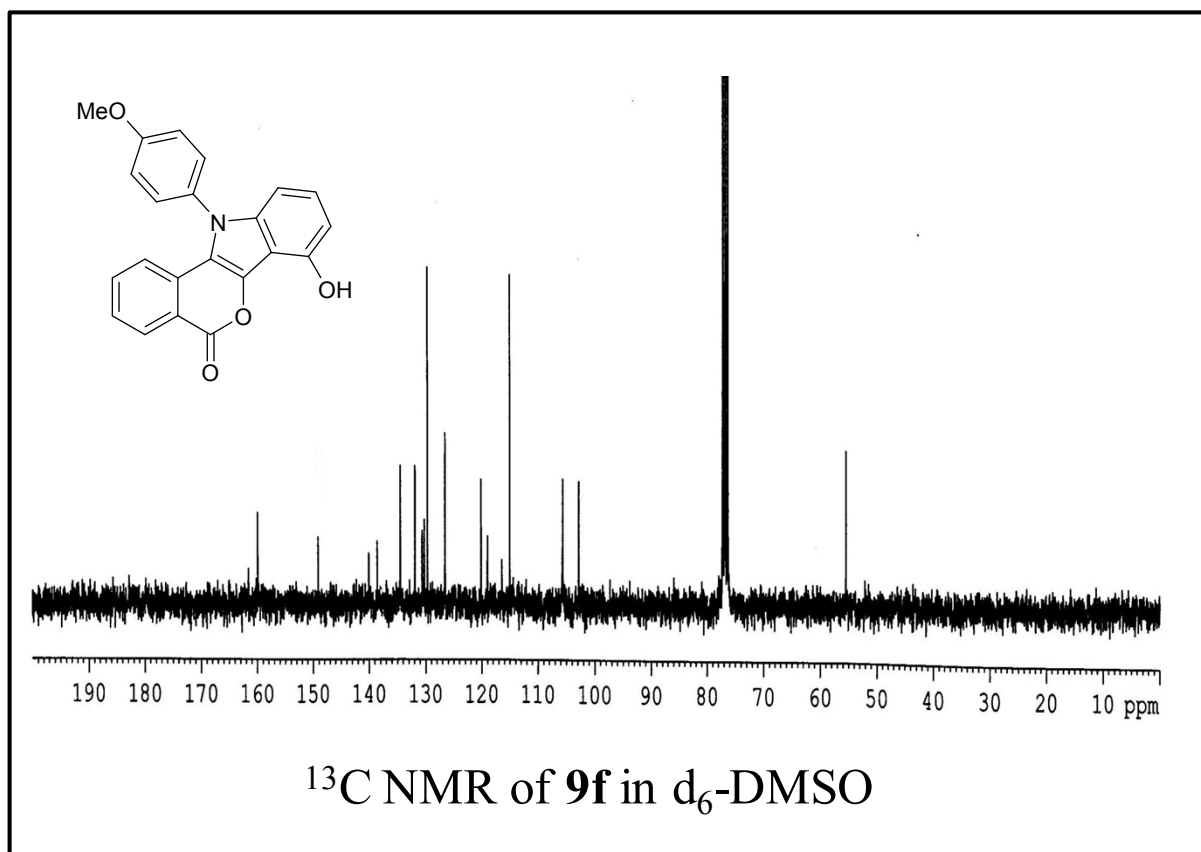

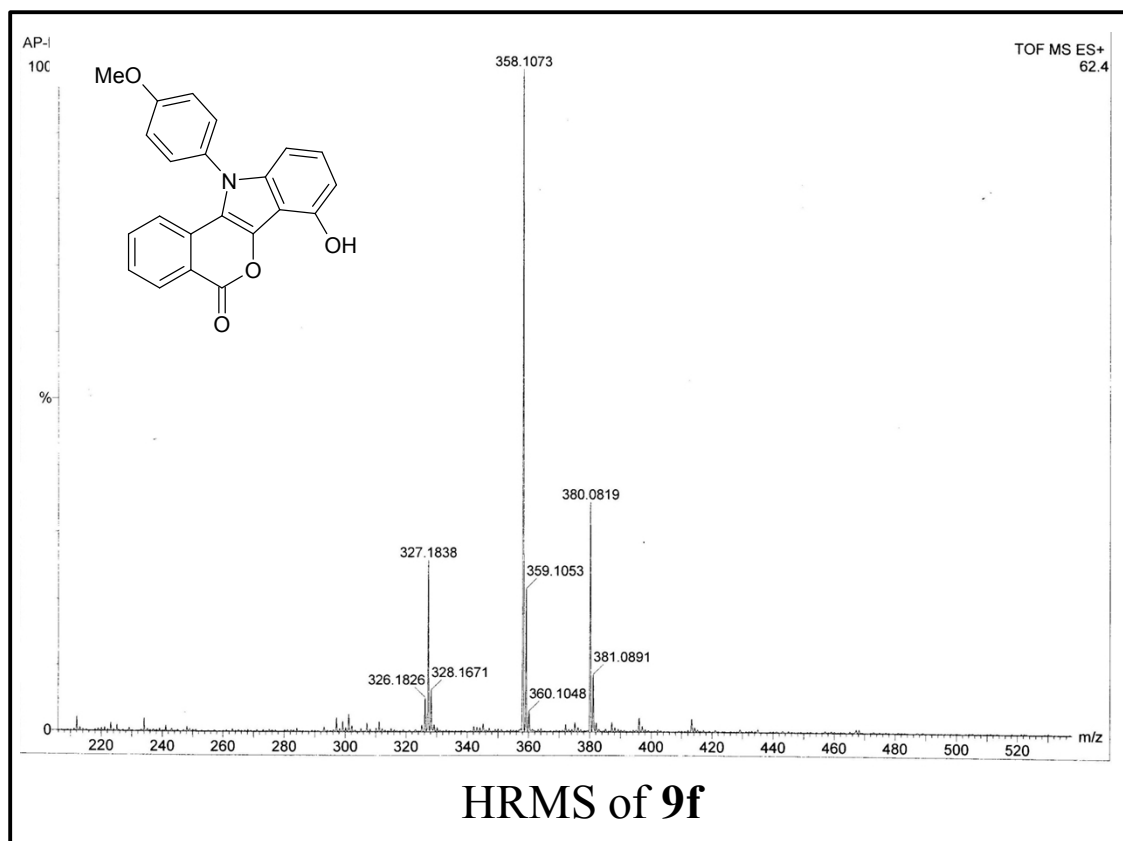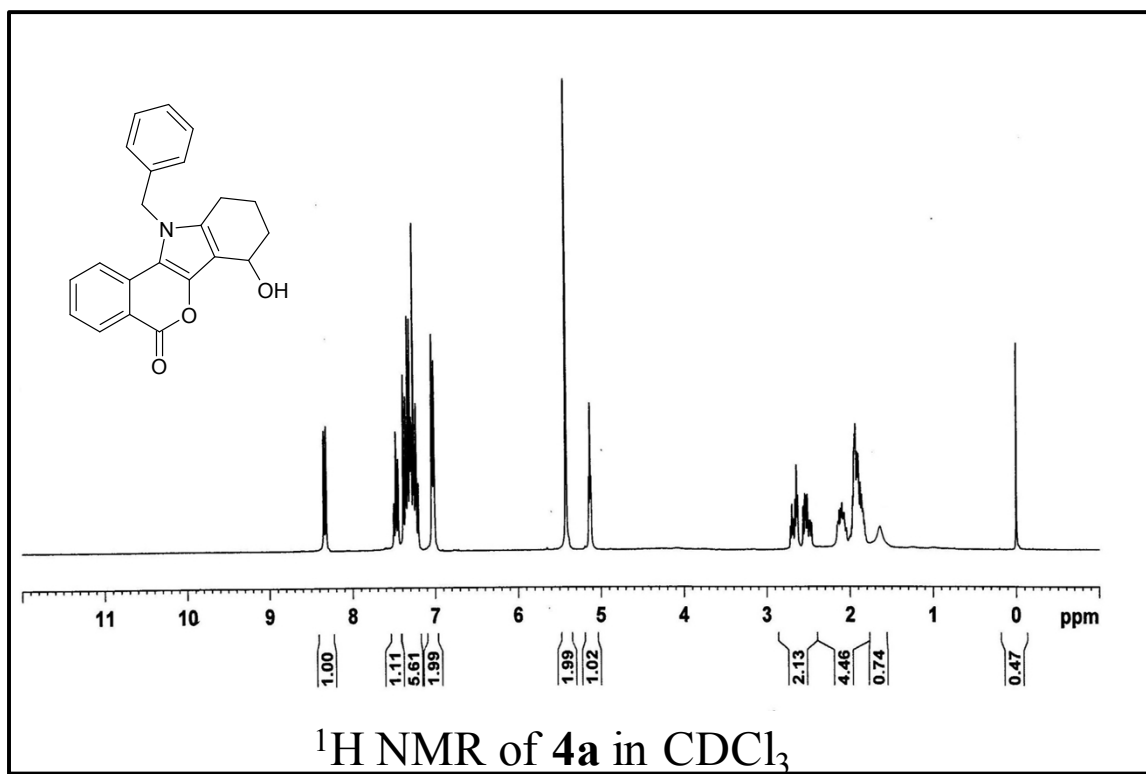

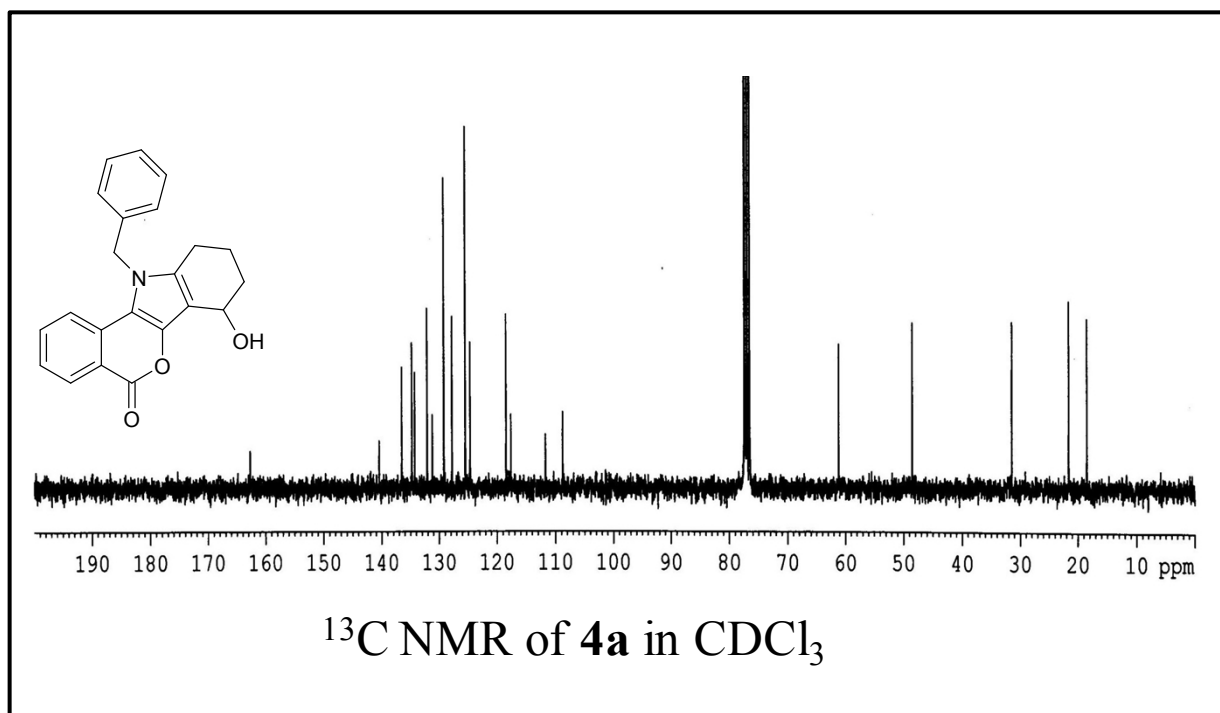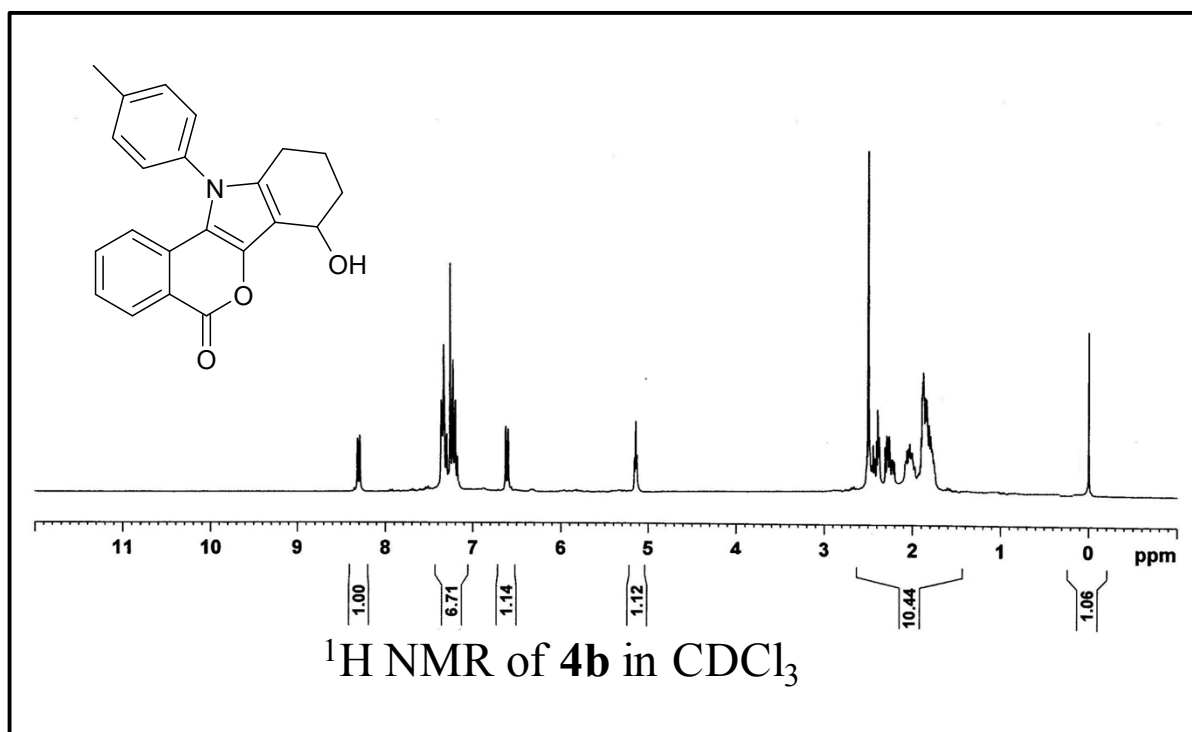

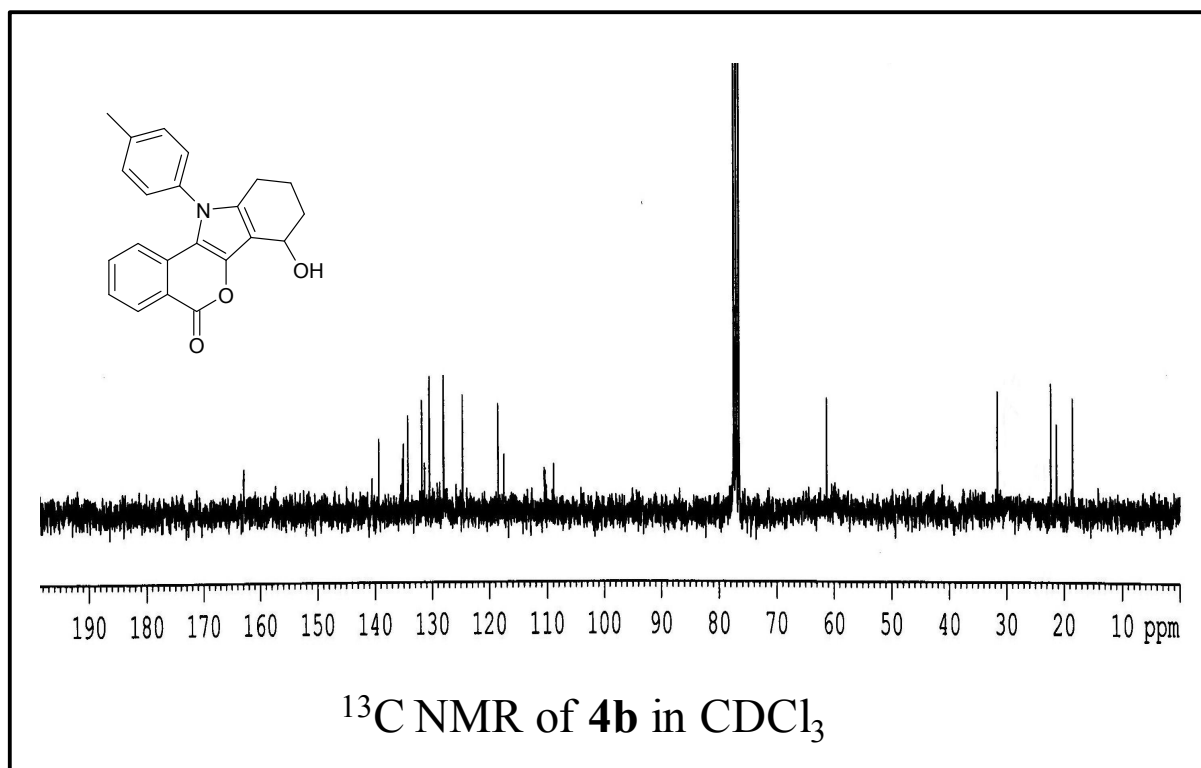

Supplement: c5ra01060h1.pdf [file c5ra01060h1.pdf]
